# Supplementary material for: Metabolome profiling and molecular docking analysis revealed the metabolic differences and potential pharmacological mechanisms of the inflorescence and succulent stem of Cistanche deserticola
Source: Royal Society of Chemistry journal article supplement (doi:10.1039/d0ra07488h), 2021-01-01
Supplement: d0ra07488h1.xlsx [file d0ra07488h1.xlsx]

## Sheet: Supplementary file S1
Supplementary file S1 Metabolome data																		A1			B1			C1			A2			B2			C2					A: saline-alkali land B: grassland C: sandy land
Index	Name	Ion mode	Q1 (Da)	Q3 (Da)	Rt (min)	Molecular Weight (Da)	Ionization model	DP (V)	CE (V)	KEGG ID	Compounds	Class	CV_value	mix01	mix02	mix03	mix04	HM1-1	HM2-1	HM3-1	HM4-1	HM5-1	HM6-1	HM26-1	HM27-1	HM28-1	HM1-2	HM2-2	HM3-2	HM4-2	HM5-2	HM6-2	HM26-2	HM27-2	HM28-2	cpd_ID	kegg_map	1:inflorescences, 2: succulent stems
CdM3	pme1936	Positive	114.059	114	0.57	113.059	[M+H]+	50	30	C00791	Creatinine	Organic acids	0.0913989	479000	551000	598000	564000	566000	432000	549000	379000	646000	522000	542000	587000	575000	290000	726000	626000	585000	541000	695000	392000	624000	380000	ko00330,ko01100
CdM4	pma2987	Positive	142.1	82.9	0.58	141.1	[M+H]+	50	30	C00860	Histidinol	Others	0.0658312	190000000	217000000	203000000	189000000	209000000	151000000	233000000	127000000	235000000	175000000	190000000	224000000	206000000	113000000	249000000	230000000	226000000	187000000	261000000	147000000	232000000	131000000	ko00340,ko01100,ko01110,ko01230
CdM5	pme2828	Positive	140	98.9	0.59	139.027	[M+H]+	50	30	C00870	4-Nitrophenol	Others	0.0850566	212000000	239000000	252000000	258000000	83200000	53500000	203000000	177000000	95200000	118000000	325000000	300000000	141000000	366000000	147000000	230000000	318000000	318000000	227000000	402000000	247000000	426000000	C00870	ko00627,ko01120
CdM6	pme3009	Positive	175	98.9	0.59	174.016	[M+H]+	50	30	-	trans-Citridic acid	Organic acids	0.14886	398000	516000	459000	565000	138000	103000	353000	407000	153000	238000	764000	695000	249000	1080000	188000	374000	702000	632000	417000	1070000	513000	1110000	--
CdM7	pmd0017	Positive	203	112	0.6	202	[M+H]+	50	30	C00750	Spermine	Phenolamides	0.049656	174000000	193000000	194000000	190000000	186000000	99300000	179000000	104000000	219000000	149000000	177000000	194000000	187000000	82100000	228000000	226000000	186000000	192000000	231000000	126000000	191000000	125000000	C00750	ko00330,ko00410,ko00480,ko01100,ko04976
CdM8	pme2755	Positive	222	138.1	0.6	221.09	[M+H]+	50	30	C00140	N-Acetyl-D-glucosamine	Carbohydrates	0.107102	6540000	6470000	7760000	7900000	9130000	4930000	7070000	4340000	7720000	5260000	5480000	7590000	6190000	2830000	9130000	8590000	7250000	7910000	8600000	5300000	8430000	4320000	ko00520,ko01100,ko02010,ko02060
CdM11	pme2122	Positive	112.08	94.6	0.63	111.08	[M+H]+	50	30	C00388	Histamine	Amino acid derivatives	0.16529	140000	193000	203000	205000	140000	392000	148000	65900	72600	738000	183000	19700	74200	173000	318000	28700	159000	69200	2320000	9	9	9	C00388	ko00340,ko01065,ko01100,ko01110,ko04080,ko04664,ko04721,ko04750,ko04971,ko04974,ko05310,ko07227
CdM13	pme2292	Positive	89	71.9	0.64	88.1	[M+H]+	50	30	C00134	Putrescine	Phenolamides	0.0695187	1920000	1980000	2180000	2210000	1190000	10500000	1100000	8590000	473000	3950000	874000	999000	1510000	2020000	2370000	211000	1440000	838000	3110000	3850000	1030000	192000	C00134	ko00330,ko00480,ko00960,ko01060,ko01064,ko01100,ko01110,ko01130,ko02010,ko04974
CdM15	pme2617	Positive	166	149.1	0.65	165.046	[M+H]+	50	30	-	Methionine sulfoxide	Amino acid derivatives	0.0950616	1930000	2070000	2210000	2410000	2250000	1110000	2050000	1220000	2360000	1620000	2090000	2040000	2300000	882000	3240000	2520000	2010000	2060000	2650000	1360000	2240000	1410000	--
CdM18	pmc0066	Positive	333.052	137	0.67	332.052	[M+H]+	50	30	C06196	2'-Deoxyinosine-5'-monophosphate	Nucleotide and its derivates	0.227117	201000	126000	211000	220000	3930000	183000	1520000	412000	1410000	43400	2030000	9470	4830000	16500000	1120000	78100	346000	1130000	1920000	218000	47500	24600	C06196	ko00230
CdM19	pme2046	Positive	170	96	0.67	169.181	[M+H]+	50	30	-	3-N-Methyl-L-histidine	Amino acid derivatives	0.0663822	200000	228000	219000	200000	209000	302000	395000	246000	461000	31400	337000	17200	220000	9	9	9	2840000	1550000	267000	9	9	9	--
CdM20	pme0026	Positive	147	83.2	0.68	146.106	[M+H]+	50	30	C00047	L-(+)-Lysine	Amino acids	0.0117312	4460000	4470000	4400000	4360000	3560000	5480000	6420000	4220000	8830000	3840000	8210000	3780000	5780000	2870000	14800000	4860000	4990000	1060000	4590000	2310000	1250000	265000
CdM21	pme0037	Positive	156.1	110	0.68	155.07	[M+H]+	50	30	C00135	L-Histidine	Amino acids	0.0581703	6340000	6110000	5630000	5670000	4670000	482000	6080000	68800	9500000	22800000	4820000	1440000	1330000	15400000	30600000	164000	46700000	12500000	91000000	292000	399000	346000
CdM23	pme0193	Positive	147.069	83.7	0.68	146.069	[M+H]+	50	30	C00064	L-Glutamine	Amino acids	0.00795922	4890000	4880000	4810000	4830000	3930000	5690000	6620000	4570000	9510000	4140000	9090000	4240000	6210000	3200000	15900000	5310000	5350000	1250000	5090000	2660000	1380000	318000	ko00220,ko00230,ko00240,ko00250,ko00471,ko00630,ko00910,ko00970,ko01060,ko01100,ko01120,ko01230,ko02010,ko02020,ko04724,ko04727,ko04964,ko04974,ko04978,ko05230
CdM26	pme2108	Positive	163	103	0.7	162.113	[M+H]+	50	30	C00318	L-Carnitine	Others	0.225294	22000	18600	31300	26900	25900	10100	51700	21700	37600	5810	20300	20400	20500	50200	30900	69500	48900	34200	63100	9	9	9	C00318	ko04976
CdM30	pme0043	Positive	175	69.9	0.73	174.112	[M+H]+	50	30	C00062	L-(+)-Arginine	Amino acids	0.063525	1660000	1870000	1630000	1680000	707000	89400	1350000	9	9	9	1760000	6530000	1440000	4710000	7680000	1730000	5260000	583000	1370000	776000	473000	625000
CdM32	pmb0484	Positive	104.1	60.2	0.74	103.1	[M+H]+	50	30	C00114	Choline	Cholines	0.0255226	202000000	201000000	200000000	191000000	202000000	181000000	217000000	214000000	172000000	31600000	213000000	129000000	196000000	206000000	210000000	138000000	160000000	187000000	173000000	495000000	186000000	353000000	ko00260,ko00564,ko01100,ko02010,ko04725,ko04976,ko05231
CdM38	pme3017	Positive	104	85.9	0.74	103.063	[M+H]+	50	30	C03665	2-Aminoisobutyric acid	Amino acid derivatives	0.0408622	25400000	24000000	24300000	23000000	24300000	22500000	26600000	25600000	20200000	3430000	27000000	14000000	24400000	26400000	26200000	16200000	17800000	25500000	21000000	86300000	22600000	53500000	--
CdM39	pme0038	Positive	112	95	0.75	111.043	[M+H]+	50	30	C00380	Cytosine	Nucleotide and its derivates	0.110284	65300	82200	66000	70200	137000	34300	131000	36900	149000	25300	329000	21400	151000	74800	229000	30500	33200	67800	50500	78800	13000	148000	ko00240,ko01100
CdM40	pme3033	Positive	104	58	0.75	103.063	[M+H]+	50	30	C01026	N,N-Dimethylglycine	Amino acid derivatives	0.0534017	898000	903000	849000	805000	689000	775000	879000	863000	662000	166000	1010000	529000	881000	982000	1010000	557000	600000	895000	687000	2920000	713000	1760000	C01026	ko00260,ko01100
CdM44	pme2735	Positive	399.2	250.1	0.76	398.137	[M+H]+	50	30	C00019	S-(5'-Adenosyl)-L-methionine	Amino acid derivatives	0.171225	788000	652000	595000	530000	357000	180000	2000000	76000	2090000	254000	1440000	269000	1250000	86500	3500000	31300	189000	1670000	1670000	79100	90000	41100	ko00261,ko00270,ko00330,ko00908,ko01060,ko01070,ko01100,ko01110,ko01130,ko01230,ko04122
CdM45	pmb0962	Positive	235.1	118.4	0.77	234.1	[M+H]+	50	30	-	Lysine butyrate	Amino acid derivatives	0.100157	112000000	132000000	109000000	107000000	104000000	81500000	109000000	108000000	132000000	106000000	103000000	125000000	114000000	75100000	107000000	144000000	130000000	101000000	91000000	98200000	109000000	103000000	--
CdM47	pme0285	Positive	146.085	85.9	0.77	145.085	[M+H]+	50	30	C01035	4-Guanidinobutyric acid	Organic acids	0.0972088	1980000	2170000	2070000	1720000	536000	1440000	975000	2240000	735000	1290000	1140000	2640000	789000	3600000	1480000	2190000	1410000	5420000	753000	9660000	908000	6770000	C01035	ko00330,ko01100
CdM55	pme3011	Positive	104.06	87	0.77	103.063	[M+H]+	50	30	C00334	γ-aminobutyric acid	Organic acids	0.138818	45200	45900	40300	55800	132000	15300	46500	42400	38900	88700	81500	43600	104000	109000	41100	11200	11600	5960	83100	30400	31600	18700	C00334	ko00250,ko00330,ko00410,ko00650,ko00760,ko01100,ko01120,ko02024,ko04024,ko04080,ko04721,ko04723,ko04727,ko04742,ko04915,ko05032,ko05033
CdM56	pmb1754	Positive	184	83.2	0.78	183	[M+H]+	50	30	C00588	O-Phosphocholine	Cholines	0.0777867	831000	805000	874000	959000	826000	684000	995000	671000	1100000	682000	935000	759000	912000	556000	879000	676000	753000	782000	750000	655000	683000	768000	ko00564,ko01100,ko05231
CdM58	pme1828	Positive	118.1	118.1	0.78	117.079	[M+H]+	50	30	C00719	Betaine	Alkaloids	0.0290646	261000000	268000000	257000000	250000000	299000000	244000000	287000000	281000000	309000000	279000000	297000000	288000000	260000000	308000000	330000000	294000000	296000000	235000000	288000000	236000000	257000000	254000000
CdM61	pme3174	Positive	324	112	0.78	323.052	[M+H]+	50	30	C00055	Cytidine 5'-monophosphate (Cytidylic acid)	Nucleotide and its derivates	0.0819741	82800	72400	68900	78500	20300	6560	22300	6550	12500	74000	9500	3270	10700	2620	52300	27500	9	9	9	9	9	9	ko00240,ko01100
CdM63	pmb0464	Positive	458.1	116.4	0.79	457.1	[M+H]+	50	30	-	Aspartic acid di-O-glucoside	Amino acid derivatives	0.116893	92400	74100	94900	79800	14300	9990	211000	24100	66400	31500	125000	15500	246000	31700	89000	60400	6820	42500	12900	28300	54800	81200	--	--
CdM64	pme0006	Positive	116.1	70	0.79	115.063	[M+H]+	50	30	C00148	L-Proline	Amino acids	0.088039	4170000	4440000	4120000	4970000	2840000	273000	16500000	322000	6300000	1680000	11000000	12900000	14700000	419000	17300000	651000	1280000	1020000	1530000	522000	170000	106000
CdM67	pme1944	Positive	183.08	111	0.79	182.079	[M+H]+	50	30	C00392	D-Mannitol	Alcohols and polyols	0.181541	356000	455000	384000	531000	938000	170000	1010000	260000	584000	131000	510000	3190	919000	417000	413000	168000	353000	393000	432000	133000	422000	90800	ko00051,ko02010,ko02060
CdM68	pme2268	Positive	138	137.9	0.79	137.048	[M+H]+	50	30	C01004	Trigonelline	Alkaloids	0.132982	14700000	17300000	13700000	12800000	1800000	10200000	3560000	32900000	1860000	11700000	3610000	21400000	3970000	27600000	3640000	7330000	12300000	61200000	2880000	35200000	19200000	42500000	ko00760
CdM69	pma3101	Positive	256.2	124	0.8	255.2	[M+H]+	50	30	C05841	Nicotinate ribonucleoside	Nicotinic acid derivatives	0.100113	1090000	1390000	1240000	1210000	368000	1770000	1610000	2150000	783000	680000	1410000	534000	1990000	7410000	976000	647000	144000	681000	1080000	1790000	288000	2470000	ko00760,ko01100
CdM70	pma6270	Positive	258.2	125.2	0.8	258.2	Protonated	50	30	C00670	sn-Glycero-3-phosphocholine	Cholines	0.374563	14400	15600	8480	7010	19100	7170	20100	3270	34000	6530	2940	15200	27400	9	9	9	21400	27500	33500	9	9	9	ko00564,ko00565,ko05231
CdM73	pme1119	Positive	269.1	137	0.8	268.081	[M+H]+	50	30	C00294	Inosine	Nucleotide and its derivates	0.228421	26200	40300	26800	38700	21600	25100	18100	11800	11600	12000	9	9	9	25600	12700	38400	62300	44000	25700	27700	30100	28900	C00294	ko00230,ko01100
CdM74	pmb0964	Positive	366.2	203.5	0.81	365.2	[M+H]+	50	30	-	iP7G	Nucleotide and its derivates	0.130528	3680000	3520000	3680000	2750000	105000	13000000	94900	4030000	83100	6010000	98200	2000000	67500	3540000	90400	231000	454000	35300000	87800	14900000	5810000	16600000	--
CdM79	pme3732	Positive	244.086	111.4	0.82	243.086	[M+H]+	50	30	C00475	Cytidine	Nucleotide and its derivates	0.294422	380000	565000	403000	276000	455000	161000	911000	312000	1080000	196000	1630000	71400	1100000	325000	720000	146000	26900	117000	246000	323000	25900	460000	C00475	ko00240,ko01100
CdM80	pme0004	Positive	190.1	84	0.83	189.111	[M+H]+	50	30	C02427	L-Homocitrulline	Amino acids	0.244195	76200	130000	114000	86100	34500	19500	65400	24200	41000	11500	192000	26300	121000	109000	327000	42300	74000	67500	150000	286000	37200	42700	--
CdM82	pme0039	Positive	118.1	71.8	0.84	117.079	[M+H]+	50	30	C00183	L-Valine	Amino acids	0.110772	66100000	84600000	84500000	79200000	57100000	14400000	121000000	22800000	121000000	21600000	181000000	8260000	173000000	30000000	207000000	15000000	41400000	77100000	94800000	25300000	58800000	12000000
CdM84	pme2634	Positive	118	88	0.84	117.079	[M+H]+	50	30	C01826	Dl-Norvaline	Amino acids	0.203021	48300000	76700000	78200000	73300000	52000000	13700000	112000000	21300000	114000000	19700000	169000000	7810000	159000000	28100000	208000000	13500000	37500000	73300000	88600000	23700000	55300000	10900000
CdM86	pmb0514	Positive	348.1	136.4	0.85	347.1	[M+H]+	50	30	C01367	Adenosine 3'-monophosphate	Nucleotide and its derivates	0.185677	681000	1080000	941000	991000	2880000	693000	465000	529000	1790000	561000	1590000	120000	3340000	2060000	3060000	184000	166000	202000	1030000	877000	316000	729000	ko00230
CdM87	pme0183	Positive	152.1	135.1	0.85	151.049	[M+H]+	50	30	-	2-Hydroxy-6-aminopurine	Nucleotide and its derivates	0.0819308	747000	855000	912000	831000	427000	235000	325000	62300	265000	137000	1370000	428000	735000	899000	1580000	2270000	251000	547000	1040000	2940000	391000	589000	--	--
CdM91	pma3649	Positive	132.1	86.2	0.99	131.1	[M+H]+	50	30	C00430	5-Aminolevulinate	Organic acids	0.168209	16500000	24200000	20500000	23800000	9240000	4510000	20800000	11200000	25300000	9260000	54200000	8610000	30000000	12000000	60300000	10700000	22500000	33000000	30700000	25900000	11700000	5020000	C00430	ko00260,ko00860,ko01060,ko01100,ko01110,ko01120,ko02010
CdM92	pme0274	Positive	132.095	76.9	1	131.095	[M+H]+	50	30	C02378	6-Aminocaproic acid	Organic acids	0.187402	3950000	6030000	5170000	6070000	2470000	1180000	5030000	2290000	6020000	2350000	13600000	2120000	6980000	2920000	15200000	2630000	5610000	7570000	7660000	6170000	2850000	1060000	C02378	ko00930,ko01100,ko01120
CdM93	pme0122	Positive	189.2	84	1.02	188.116	[M+H]+	50	30	C02727	N6-Acetyl-L-lysine	Amino acid derivatives	0.112474	1730000	1670000	1350000	1730000	439000	197000	1370000	415000	725000	179000	2310000	457000	1410000	1160000	5480000	1670000	2400000	1390000	2690000	3870000	379000	608000	ko00310
CdM94	pme3104	Positive	150	133.1	1.03	149.07	[M+H]+	50	30	C02216	1-Methyladenine	Nucleotide and its derivates	0.138467	87600	91800	111000	81100	37800	41600	84500	28300	117000	29900	247000	46500	184000	66900	311000	149000	46100	103000	74600	109000	60500	120000	--
CdM95	pme3038	Positive	130	83.9	1.04	129.043	[M+H]+	50	30	C01879	5-oxoproline	Amino acid derivatives	0.374687	21000000	56500000	56600000	57600000	13900000	8660000	79500000	8690000	11500000	11000000	47300000	524000	75700000	6960000	229000000	70000000	26500000	40000000	42600000	7030000	35200000	868000	ko00480
CdM97	pme0490	Positive	124	78	1.11	123	[M+H]+	50	30	C00253	Nicotinic acid	Nicotinic acid derivatives	0.151049	3240000	3880000	4620000	4370000	2410000	993000	3700000	830000	6240000	1070000	14900000	4050000	2600000	1380000	3780000	1080000	3340000	1680000	3510000	630000	1150000	308000	ko00760,ko00960,ko01060,ko01064,ko01100,ko01110,ko01120,ko05133
CdM98	pme1383	Positive	170.1	134.1	1.11	169.074	[M+H]+	50	30	C00314	Pyridoxine	Vitamins	0.0912485	3980000	4970000	4660000	4630000	16500000	2710000	16600000	1600000	10000000	679000	9870000	1030000	3130000	934000	3020000	671000	1010000	2010000	6490000	5110000	518000	513000	ko00750,ko01100,ko01120
CdM99	pme0040	Positive	136.1	136.1	1.12	135.054	[M+H]+	50	30	C00147	Adenine	Nucleotide and its derivates	0.0865684	16100000	19900000	18300000	18600000	19200000	3110000	20000000	2970000	30200000	1760000	38300000	3440000	53400000	5920000	42800000	4370000	10900000	6070000	13900000	3640000	4980000	2100000	ko00230,ko00908,ko01100
CdM100	pme0113	Positive	251.3	84	1.12	250.062	[M+H]+	50	30	C00669	γ-Glu-Cys	Amino acid derivatives	0.162939	64800	43300	58400	54900	35000	49800	64600	66700	56400	46000	75300	59700	48700	49300	77700	73200	40600	102000	48800	117000	60400	115000	C00669	ko00480,ko01100,ko04216
CdM103	pme0030	Positive	182.1	136.1	1.13	181.074	[M+H]+	50	30	C00082	L-(-)-Tyrosine	Amino acids	0.0447429	210000000	200000000	223000000	210000000	194000000	34400000	187000000	59600000	191000000	79000000	227000000	135000000	146000000	36500000	259000000	75100000	282000000	224000000	296000000	130000000	181000000	10000000
CdM104	pme0033	Positive	137	110	1.13	136.038	[M+H]+	50	30	C00262	Hypoxanthine	Nucleotide and its derivates	0.161388	191000	176000	241000	243000	526000	102000	143000	47600	241000	61600	333000	53200	302000	163000	372000	81100	269000	128000	343000	59600	77500	55400	C00262	ko00230,ko01100
CdM105	pme0108	Positive	126.1	126.1	1.13	125.059	[M+H]+	50	30	C02376	5-Methylcytosine	Nucleotide and its derivates	0.273728	135000	158000	183000	91600	77600	23800	108000	39700	243000	141000	1040000	84400	72100	39900	150000	117000	9	9	9	94900	86300	77600	ko00240
CdM108	pme1173	Positive	137	110	1.13	136.039	[M+H]+	50	30	-	Allopurinol	Others	0.099416	115000	132000	128000	106000	379000	77400	120000	22300	153000	31700	189000	35400	233000	113000	201000	30900	100000	54400	150000	33500	51500	46300	--	--
CdM109	pme1194	Positive	228	112	1.13	227.091	[M+H]+	50	30	C00881	Deoxycytidine	Nucleotide and its derivates	0.147959	334000	465000	454000	391000	377000	66600	431000	65400	803000	40700	2460000	44500	688000	95600	346000	73400	27900	89400	101000	324000	89400	148000	C00881	ko00240
CdM111	pma0134	Positive	121.042	77.1	1.14	120.042	[M+H]+	50	30	-	D(-)-Threose	Carbohydrates	0.0681134	8910000	10000000	10000000	10500000	5530000	16900000	2450000	3220000	902000	9580000	16100000	676000	3550000	987000	3650000	767000	32400000	57000000	955000	9330000	4500000	10000000	--
CdM112	pmb0197	Positive	298.1	166.5	1.14	297.1	[M+H]+	50	30	-	N2-methylguanosine	Nucleotide and its derivates	0.106363	347000	429000	443000	393000	388000	398000	710000	84000	1060000	196000	917000	206000	332000	374000	610000	537000	47500	60100	942000	142000	40400	406000	--	--
CdM114	pmb0789	Positive	332.1	314.7	1.14	331.1	[M+H]+	50	30	-	Pyridoxine O-glucoside	Vitamins	0.0652571	41000000	47700000	45800000	46600000	22400000	30900000	36000000	47600000	27400000	14700000	14900000	54700000	38400000	81500000	5350000	16300000	70200000	88600000	47900000	103000000	45400000	60500000	--
CdM117	pme3184	Positive	332	136.1	1.14	331.068	[M+H]+	50	30	C00360	2'-Deoxyadenosine-5'-monophosphate	Nucleotide and its derivates	0.0922968	3980000	4860000	4860000	4760000	2320000	2980000	3440000	4510000	2740000	1440000	1980000	5440000	4090000	8470000	998000	1600000	7230000	9880000	4620000	12100000	4620000	6200000	C00360	ko00230,ko01100
CdM118	pmb0998	Positive	364.1	152.5	1.15	363.1	[M+H]+	50	30	C00144	Guanosine 5'-monophosphate	Nucleotide and its derivates	0.121857	356000	276000	353000	364000	524000	144000	143000	168000	372000	119000	390000	538000	685000	416000	762000	114000	106000	43000	295000	247000	163000	342000	ko00230,ko01060,ko01065,ko01100,ko01523,ko04022,ko04740,ko04742,ko04744
CdM122	pmb0782	Positive	86.1	56	1.16	85.1	[M+H]+	50	30	C01746	Piperidine	Alkaloids	0.0420124	7480000	7800000	8280000	7810000	3750000	2410000	6590000	4410000	8380000	3630000	14800000	3310000	7500000	4580000	19500000	5290000	6990000	11100000	9940000	8530000	4960000	1690000	ko00960,ko04974
CdM123	pma0948	Positive	138.091	77.2	1.18	137.091	[M+H]+	50	30	-	Hydroxyphenethylamine	Others	0.0432157	20800000	22600000	22600000	22900000	12900000	38500000	4940000	7460000	1850000	21000000	35700000	1660000	7090000	1960000	8870000	1600000	74200000	126000000	1050000	21300000	9770000	23000000	--
CdM124	pme1210	Positive	150	72.8	1.18	149.051	[M+H]+	50	30	C00073	L-Methionine	Amino acids	0.080796	1150000	1220000	1390000	1240000	545000	171000	1730000	213000	1810000	383000	2810000	382000	1810000	321000	3400000	404000	617000	726000	4260000	132000	961000	51500
CdM127	pme0258	Positive	113.027	95.9	1.19	112.027	[M+H]+	50	30	C00106	Uracil	Nucleotide and its derivates	0.0939267	2280000	2490000	2840000	2440000	4080000	980000	2130000	1880000	3620000	974000	4290000	382000	3920000	2780000	4410000	1520000	65100	123000	1130000	1600000	634000	2430000	ko00240,ko00410,ko00770,ko01100
CdM129	pme0019	Positive	132.1	86	1.2	131.095	[M+H]+	50	30	C00123	L-Leucine	Amino acids	0.0504185	188000000	193000000	208000000	207000000	125000000	68900000	186000000	135000000	206000000	116000000	241000000	111000000	197000000	136000000	261000000	152000000	184000000	251000000	213000000	209000000	148000000	55200000
CdM130	pme1002	Positive	138.084	103	1.2	137.084	[M+H]+	50	30	C00483	L-Tyramine	Amino acids	0.0427166	45800000	47900000	49600000	50500000	28400000	80200000	10600000	15800000	4330000	46900000	76600000	3550000	15600000	4110000	19000000	3210000	158000000	258000000	2110000	45800000	22100000	49000000	ko00350,ko00680,ko00950,ko01060,ko01063,ko01110,ko04080,ko04974
CdM134	pme1218	Positive	124.03	77.8	1.21	123.032	[M+H]+	50	30	C10164	2-Picolinic acid	Organic acids	0.112788	500000	596000	653000	628000	358000	186000	615000	132000	1160000	205000	2850000	741000	453000	106000	517000	205000	39200	131000	223000	76000	108000	67900	C10164	ko00380,ko01100
CdM135	pme3384	Positive	162	74	1.21	161.069	[M+H]+	50	30	-	N-Acetylthreonine	Amino acid derivatives	0.0385594	218000	202000	220000	217000	121000	215000	150000	354000	149000	177000	206000	83200	204000	447000	118000	210000	185000	114000	192000	207000	298000	208000	--	--
CdM136	pme0109	Positive	212.2	166.1	1.22	211.084	[M+H]+	50	30	C07194	(-)-3-(3,4-Dihydroxyphenyl)-2-methylalanine	Amino acid derivatives	0.103446	71600	78300	62200	77800	60000	20600	136000	19300	118000	36500	69400	118000	83100	95400	94700	96100	78700	55200	61700	52000	54400	53200	--
CdM139	pme1242	Positive	322.4	176.1	1.23	321.1	[M+H]+	50	30	C11347	S-(methyl)glutathione	Amino acid derivatives	0.107098	504000	433000	555000	466000	404000	339000	253000	101000	281000	199000	565000	82600	242000	85400	1050000	158000	701000	1230000	431000	162000	305000	88400	--	--
CdM148	pme0174	Positive	132.1	72.8	1.29	131.058	[M+H]+	50	30	-	N-Propionylglycine	Amino acid derivatives	0.0436009	1510000	1580000	1650000	1660000	888000	392000	1430000	880000	1730000	766000	2910000	742000	1540000	893000	3330000	1140000	1570000	2100000	1860000	1760000	1040000	308000	--	--
CdM151	pme1286	Positive	385	136.1	1.31	384.122	[M+H]+	50	30	C00021	S-(5'-Adenosy)-L-homocysteine	Amino acid derivatives	0.075678	2400000	2120000	2550000	2390000	2500000	191000	2240000	87300	3020000	337000	4780000	298000	5590000	167000	16400000	235000	380000	506000	4310000	87000	255000	21500	ko00270,ko01100,ko01230
CdM155	pme0005	Positive	121	121	1.42	120.044	[M+H]+	50	30	C15587	Purine	Nucleotide and its derivates	0.0422977	7240000	7710000	8010000	7800000	4220000	12600000	1740000	2550000	630000	7460000	12300000	599000	2500000	619000	3170000	578000	27100000	43900000	428000	6980000	3530000	7670000	--
CdM158	pmb0037	Positive	166.1	121.4	1.45	165.1	[M+H]+	50	30	C06199	Hordenine	Alkaloids	0.0428724	142000	141000	154000	150000	510000	47000	338000	118000	198000	37400	128000	31600	181000	45100	166000	35900	124000	141000	205000	118000	130000	171000	ko00350
CdM159	pmb0790	Positive	494.1	332.8	1.46	493.1	[M+H]+	50	30	-	Pyridoxine di-O-hexoside	Vitamins	0.149239	227000	247000	314000	294000	78200	122000	77500	91000	141000	118000	34700	353000	118000	225000	162000	98700	904000	1600000	43300	461000	80300	388000	--	--
CdM161	pme1346	Positive	300.1	168.1	1.48	299.087	[M+H]+	50	30	-	8-Hydroxyguanosine	Nucleotide and its derivates	0.107822	211000	239000	245000	194000	9	9	9	113000	107000	118000	94000	87400	90700	177000	138000	298000	512000	295000	128000	549000	289000	396000	--	--
CdM162	pme3333	Positive	153.06	136.1	1.48	152.059	[M+H]+	50	30	-	1,4-dihydro-1-Methyl-4-oxo-3-pyridinecarboxamide	Pyridine derivatives	0.096905	816000	766000	959000	871000	1440000	400000	1220000	413000	1520000	323000	1800000	167000	1120000	561000	1350000	438000	225000	252000	540000	755000	256000	861000	--
CdM163	pmb0800	Positive	123.1	80.3	1.49	122.1	[M+H]+	50	30	C00153	Niacinamide	Vitamins	0.0469083	11000000	11600000	12200000	12100000	16000000	5250000	12800000	4010000	20300000	5960000	15000000	4860000	16800000	5320000	27000000	11800000	10800000	3770000	15400000	5950000	9190000	4570000	C00153	ko00760,ko01100,ko04212,ko04977
CdM168	pme0031	Positive	127	110	1.56	126.043	[M+H]+	50	30	C00178	Thymine	Nucleotide and its derivates	0.0895833	277000	275000	330000	310000	9	9	9	33700	443000	51400	897000	79400	397000	50700	860000	652000	113000	201000	162000	190000	203000	88800	C00178	ko00240,ko01100
CdM169	pmb0801	Positive	346	184.5	1.57	345	[M+H]+	50	30	-	4-Pyridoxic acid O-hexoside	Vitamins	0.0619626	732000	712000	813000	788000	101000	219000	160000	290000	276000	303000	200000	463000	332000	473000	417000	4600000	653000	2350000	216000	1580000	750000	1250000	--
CdM170	pme1228	Positive	221.1	114.8	1.58	220.085	[M+H]+	50	30	C00643	5-Hydroxy-L-tryptophan	Amino acid derivatives	0.0829283	227000	223000	257000	262000	864000	42500	453000	55100	83100	111000	310000	121000	216000	236000	383000	88400	288000	760000	285000	263000	95600	45600	--
CdM172	pme0295	Positive	146.074	85.8	1.59	145.074	[M+H]+	50	30	-	4-Acetamidobutyric acid	Organic acids	0.0808088	1200000	1200000	1370000	1390000	1660000	149000	2060000	1040000	1790000	295000	2570000	2320000	2060000	252000	5210000	331000	9	9	9	9	9	9	--	--
CdM176	pmb0212	Positive	348.1	187.7	1.68	347.1	[M+H]+	50	30	-	Kinetin 9-riboside	Phytohormones	0.105132	1280000	1480000	1390000	1640000	2040000	951000	1270000	863000	1740000	313000	446000	325000	1980000	1530000	933000	1210000	1480000	1290000	1720000	1630000	725000	828000
CdM179	pme3838	Positive	346.2	152	1.68	345.047	[M+H]+	50	30	C00942	Guanosine 3',5'-cyclic monophosphate	Nucleotide and its derivates	0.0348427	179000	183000	194000	188000	98100	239000	169000	9	9	9	9	9	9	685000	398000	110000	127000	35500	77100	420000	232000	536000	C00942	ko00230,ko04022,ko04270,ko04540,ko04611,ko04713,ko04730,ko04740,ko04744,ko04921,ko04923,ko04924,ko04925,ko04970,ko04976
CdM181	pme2801	Positive	167	124.1	1.74	166.049	[M+H]+	50	30	C16353	7-Methylxanthine	Nucleotide and its derivates	0.135624	656000	604000	592000	470000	168000	352000	195000	102000	909000	513000	369000	436000	449000	405000	1160000	1150000	372000	693000	1030000	1610000	303000	596000	ko00232,ko01100,ko01110,ko01120
CdM182	pme1419	Positive	164	61	1.77	163	[M+H]+	50	30	-	L-Methionine methyl ester	Amino acid derivatives	0.289886	155000	79400	107000	100000	93200	113000	133000	9	9	9	176000	80500	118000	9	9	9	84900	224000	263000	9	9	9	--
CdM183	pme0263	Positive	259.085	126.7	1.78	258.085	[M+H]+	50	30	-	5-Methyluridine	Nucleotide and its derivates	0.041384	254000	248000	257000	273000	201000	108000	155000	9	9	9	1220000	82600	651000	68900	482000	79400	135000	103000	251000	44100	116000	56100	--	--
CdM186	pme0230	Positive	268.097	136.1	1.88	267.097	[M+H]+	50	30	C00212	Adenosine	Nucleotide and its derivates	0.0061756	460000000	458000000	460000000	454000000	467000000	323000000	439000000	365000000	454000000	388000000	491000000	302000000	404000000	385000000	462000000	443000000	238000000	202000000	243000000	484000000	244000000	476000000	C00212	ko00230,ko01100,ko04022,ko04024,ko04071,ko04080,ko04270,ko04923,ko04924,ko05012,ko05032,ko05034
CdM188	pmb0374	Positive	136.1	119.3	1.89	135.1	[M+H]+	50	30	-	Aminopurine	Others	0.0440786	34200000	33200000	36500000	33400000	49100000	11700000	48500000	23900000	60300000	17900000	66800000	10800000	41700000	18800000	43100000	35000000	7170000	5410000	7450000	42900000	7150000	32000000	--	--
CdM190	pme3350	Positive	284	168.1	1.91	283.092	[M+H]+	50	30	-	8-Hydroxy-2-deoxyguanosine	Nucleotide and its derivates	0.283814	274000	156000	313000	317000	138000	1320000	110000	432000	31100	346000	53500	595000	73500	510000	42800	371000	1140000	439000	149000	564000	86600	215000	--	--
CdM191	pme0191	Positive	189.1	86	1.92	188.116	[M+H]+	50	30	C02155	N-Glycyl-L-leucine	Amino acid derivatives	0.0311804	349000	334000	324000	340000	158000	119000	480000	45100	612000	168000	1180000	202000	170000	81200	824000	257000	225000	267000	242000	140000	84600	43500	--
CdM192	pme1008	Positive	216.035	170.1	1.92	215.035	[M+H]+	50	30	-	3-Chloro-L-tyrosine	Amino acid derivatives	0.255416	45300	29800	27100	43500	9	9	9	9	9	9	248000	103000	176000	123000	110000	117000	9	9	9	9	9	9	--
CdM193	pmb0478	Positive	455.1	437.4	1.93	454.1	[M+H]+	50	30	-	Coumarin O-rutinoside	Hydroxycinnamoyl derivatives	0.0346043	2590000	2570000	2770000	2680000	2110000	58400	8440000	211000	4460000	118000	663000	62100	4860000	191000	2000000	267000	137000	89200	705000	139000	163000	159000	--
CdM194	pmc0274	Positive	167.1	121	1.96	166.1	[M+H]+	50	30	C16614	6-Methylmercaptopurine	Nucleotide and its derivates	0.00992746	128000000	127000000	127000000	125000000	194000000	19700000	122000000	16300000	171000000	38800000	255000000	39200000	121000000	22300000	305000000	40800000	112000000	69800000	189000000	67000000	33100000	8540000	ko00983
CdM195	pme3961	Positive	252	136.1	1.96	251.102	[M+H]+	50	30	C00559	Deoxyadenosine	Nucleotide and its derivates	0.0447619	15700000	14700000	16400000	15700000	14500000	1290000	9410000	1580000	34100000	1320000	115000000	2340000	15500000	3050000	10600000	3040000	547000	738000	1900000	3150000	2030000	2710000	C00559	ko00230,ko01100
CdM196	pme0025	Positive	209.1	146.1	1.98	208.085	[M+H]+	50	30	C00328	L-Kynurenine	Amino acid derivatives	0.14648	128000	105000	151000	129000	47100	82100	167000	36400	173000	67900	148000	72800	20400	31700	357000	194000	157000	266000	219000	62000	60600	63800	C00328	ko00380,ko01100,ko05143
CdM199	pme0489	Positive	137	108	2	136	[M+H]+	50	30	-	N-Methylnicotinamide	Nicotinic acid derivatives	0.0911966	318000	291000	349000	288000	338000	195000	215000	9	9	9	149000	471000	792000	386000	158000	272000	632000	981000	506000	9	9	9
CdM200	pma1751	Positive	286	124.3	2.03	285	[M+H]+	50	30	-	Nicotinic acid-hexoside	Nicotinic acid derivatives	0.020206	6940000	7060000	7150000	7280000	1530000	2860000	21400000	4580000	6630000	1160000	7120000	19300000	3560000	3900000	4840000	4130000	4100000	8160000	4770000	7290000	7340000	7820000
CdM201	pmc0281	Positive	400.2	136.1	2.05	399.2	[M+H]+	50	30	-	Adenosine O-ribose	Nucleotide and its derivates	0.0298396	3710000	3910000	3980000	3840000	2980000	2840000	2600000	3200000	1930000	1450000	4180000	6820000	2210000	5140000	2110000	6710000	1900000	3360000	1180000	16700000	3860000	6020000	--
CdM202	pme1313	Positive	237.1	146.1	2.05	236.08	[M+H]+	50	30	C02700	N'-Formylkynurenine	Amino acid derivatives	0.0488035	557000	506000	558000	521000	155000	52800	1340000	51400	677000	97300	2640000	222000	222000	21700	2630000	81200	388000	260000	658000	94800	63600	79200	ko00380,ko01100
CdM203	pme0264	Positive	243.09	127.1	2.08	242.09	[M+H]+	50	30	C00214	Thymidine	Nucleotide and its derivates	0.0755852	1600000	1530000	1750000	1800000	1430000	80100	899000	65200	2090000	48700	11100000	121000	1610000	171000	1660000	155000	127000	167000	218000	183000	373000	126000	C00214	ko00240,ko01100
CdM206	pme3337	Positive	384	252.1	2.17	383.108	[M+H]+	50	30	-	N6-Succinyl Adenosine	Nucleotide and its derivates	0.112106	31100000	24000000	28200000	25900000	17200000	6000000	21200000	18200000	43500000	6440000	26200000	14500000	13900000	21400000	18800000	25500000	50200000	49900000	9820000	39100000	19200000	43000000	--
CdM207	pmb0064	Positive	374.1	198.6	2.18	373.1	[M+H]+	50	30	C04831	DIMBOA glucoside	Others	0.107	72100	71200	71600	57100	9	9	9	9	9	9	9	9	9	94200	198000	301000	9	9	9	61800	83800	458000	ko00402
CdM209	pmc0304	Positive	384.115	252.2	2.19	383.115	[M+H]+	50	30	-	Succinyladenosine	Nucleotide and its derivates	0.1355	29600000	23300000	30200000	24000000	16900000	5810000	20100000	18100000	41300000	6910000	25200000	14400000	13600000	21300000	17200000	22300000	47200000	47100000	9650000	37900000	16600000	41700000	--
CdM215	pme1683	Positive	477.2	258.1	2.25	476.168	[M+H]+	50	30	C12276	D-Pantothenic dcid	Organic acids	0.118997	201000	230000	268000	245000	78400	41200	355000	154000	98500	52600	428000	116000	294000	508000	583000	179000	346000	287000	515000	274000	387000	253000	--	--
CdM216	pmb0490	Positive	235.1	147.5	2.27	234.1	[M+H]+	50	30	C18326	N-p-Coumaroyl putrescine	Phenolamides	0.0629437	1410000	1330000	1300000	1210000	1670000	2690000	3700000	9	9	9	9	9	9	9	9	9	9	9	9	9	9	9	ko00330
CdM217	pmb0505	Positive	235.1	147.4	2.27	234.1	[M+H]+	50	30	-	N'-p-Coumaroyl putrescine	Phenolamides	0.0387998	1510000	1440000	1380000	1410000	1880000	3050000	4210000	9	9	9	9	9	9	9	9	9	9	9	9	9	9	9	--
CdM218	pmb0802	Positive	220.2	202.7	2.28	219.2	[M+H]+	50	30	C00864	D-Pantothenic acid	Vitamins	0.0264498	54300000	55100000	57200000	57200000	27600000	34900000	42500000	42000000	25000000	23200000	45800000	45900000	55500000	79700000	51600000	43300000	68900000	76400000	63200000	81700000	63400000	94100000	C00864	ko00410,ko00770,ko01100,ko01110,ko04977
CdM219	pmb0891	Positive	382.2	220.6	2.28	381.2	[M+H]+	50	30	-	trans-zeatin N-glucoside	Phytohormones	0.0275694	88100000	88000000	86500000	92200000	26200000	76100000	31500000	136000000	19300000	69200000	25200000	170000000	19600000	170000000	6290000	143000000	112000000	172000000	27900000	179000000	58300000	96400000	--
CdM220	pme1261	Positive	206.13	188.2	2.29	205.131	[M+H]+	50	30	C05944	Pantothenol	Alcohols and polyols	0.0504579	92700	100000	93900	103000	42200	65300	59300	124000	63000	74000	40400	18900	59600	38200	130000	59200	31900	320000	156000	144000	81100	292000	--
CdM222	pme2486	Positive	155	137	2.3	154.027	[M+H]+	50	30	C00230	Protocatechuic acid	Catechin derivatives	0.0410759	392000	409000	373000	405000	1210000	2310000	119000	1500000	56200	618000	9	9	9	269000	82300	176000	9	9	9	825000	148000	827000	C00230	ko00362,ko00400,ko00623,ko00624,ko00627,ko01061,ko01100,ko01110,ko01120,ko01130,ko01220
CdM223	pmb0069	Positive	122	105.3	2.31	121	[M+H]+	50	30	C09815	Benzamide	Others	0.0388858	853000	928000	863000	866000	395000	715000	126000	137000	162000	411000	1060000	74400	159000	244000	686000	172000	3900000	4600000	184000	1860000	617000	423000	C09815	ko00627,ko01120
CdM225	pme1378	Positive	282.1	150.1	2.31	281.112	[M+H]+	50	30	C02494	1-Methyladenosine	Nucleotide and its derivates	0.39304	83700	38100	81300	43400	65900	15700	108000	31300	83700	21900	156000	19100	51100	17700	105000	86300	11700	14500	26400	34700	15700	14900	--	--
CdM230	pme1398	Positive	465.1	303.1	2.38	465.1	Protonated	50	30	C12138	Delphinidin 3-O-glucoside (Mirtillin)	Anthocyanins	0.262822	147000	92400	94700	88200	255000	271000	287000	9	9	9	117000	155000	193000	9	9	9	135000	175000	214000	9	9	9	ko00942
CdM232	pme2366	Positive	122.1	105	2.39	121.089	[M+H]+	50	30	C05332	Phenethylamine	Others	0.0290042	3800000	4030000	3790000	3840000	1810000	3330000	593000	625000	848000	1770000	4810000	267000	750000	1060000	3070000	738000	17600000	21000000	776000	8410000	2720000	1950000	ko00360
CdM233	pme1793	Positive	595	271.8	2.4	595	Protonated	50	30	C08725	Pelargonin	Anthocyanins	0.11521	123000	92800	110000	106000	96900	141000	126000	66400	121000	37700	83200	113000	142000	108000	66500	87300	110000	108000	90100	82100	91000	73100	ko00942
CdM234	pmb1912	Positive	474.2	327.8	2.42	473.2	[M+H]+	50	30	C00234	10-Formyl-THF	Others	0.0355288	2690000	2780000	2840000	2620000	322000	589000	815000	3420000	447000	1810000	1590000	7230000	453000	2040000	828000	5970000	1590000	6780000	980000	6960000	1230000	2610000	C00234	ko00670,ko00720,ko00970,ko01100,ko01120,ko01200,ko01523
CdM241	pmb0235	Positive	323.1	145.1	2.46	322.1	[M+H]+	50	30	-	O-Feruloyl coumarin	Coumarins	0.087207	67800	80000	78800	68800	9	9	9	100000	109000	118000	9	9	9	9	9	9	9	9	9	146000	38000	168000	--	--
CdM242	pma0149	Positive	341.079	179.4	2.47	340.079	[M+H]+	50	30	C02887	Sinapoyl malate	Organic acids	0.214985	85500	104000	143000	116000	9	9	9	61800	58200	54600	9	9	9	80400	85300	90200	225000	384000	305000	219000	156000	282000	C02887	ko00940
CdM245	pmb1096	Positive	118	58.2	2.47	117	[M+H]+	50	30	C00463	Indole	Indole derivatives	0.0412603	24300000	22600000	22800000	22100000	18300000	1880000	34800000	4550000	22200000	12300000	54200000	16700000	7990000	618000	49200000	13200000	49900000	32400000	29100000	17900000	14800000	1720000	ko00380,ko00400,ko00402,ko01100,ko01110,ko04974
CdM246	pme2054	Positive	205.1	146.1	2.47	204.09	[M+H]+	50	30	C00078	L-Tryptophan	Amino acids	0.0364618	409000000	388000000	380000000	378000000	351000000	63700000	435000000	140000000	380000000	303000000	485000000	357000000	214000000	17700000	484000000	300000000	465000000	448000000	406000000	376000000	319000000	54200000
CdM247	pmb0818	Positive	206.1	147.5	2.48	205.1	[M+H]+	50	30	C05660	Methoxyindoleacetic acid	Indole derivatives	0.0622892	20200000	22000000	19000000	21100000	18300000	1630000	38100000	3590000	23200000	11400000	54400000	15700000	7160000	504000	48100000	12200000	50600000	31800000	28000000	17300000	12800000	1520000
CdM248	pmb0892	Positive	382.1	220.7	2.48	381.1	[M+H]+	50	30	-	trans-zeatin 9-O-glucoside	Phytohormones	0.0778531	548000	631000	545000	619000	626000	204000	651000	534000	788000	236000	1350000	1540000	610000	698000	857000	1430000	71900	185000	54000	243000	172000	203000	--
CdM249	pmb0492	Positive	584.2	325.8	2.49	583.2	[M+H]+	50	30	-	N',N",N"'-p-coumaroyl-cinnamoyl-caffeoyl spermidine	Phenolamides	0.0317258	545000	530000	519000	558000	411000	418000	2300000	135000	1680000	129000	1040000	103000	140000	621000	1100000	142000	67900	80500	180000	50500	205000	66100	--
CdM252	pme0133	Positive	281.3	120	2.49	280.106	[M+H]+	50	30	-	Asp-phe	Amino acid derivatives	0.0624107	1060000	1020000	1160000	1150000	311000	991000	712000	1860000	536000	989000	660000	2380000	279000	937000	1400000	1870000	1610000	2950000	873000	2630000	1530000	868000	--	--
CdM253	pma0101	Positive	293.162	234.5	2.5	292.162	[M+H]+	50	30	-	N-Caffeoyl agmatine	Phenolamides	0.063213	377000	329000	371000	345000	542000	353000	333000	114000	318000	173000	229000	328000	427000	160000	269000	215000	400000	377000	335000	246000	243000	249000	--	--
CdM254	pme2065	Positive	222.26	136.1	2.5	221.128	[M+H]+	50	30	C02029	Dihydrozeatin (DZ)	Phytohormones	0.0305678	347000	326000	340000	349000	200000	147000	140000	524000	156000	105000	113000	830000	142000	259000	120000	476000	247000	498000	691000	966000	134000	37200
CdM255	pmb0824	Positive	537.1	177.5	2.54	536.1	[M+H]+	50	30	-	Syringic acid O-feruloyl-O-hexoside	Benzoic acid derivatives	0.0622642	189000	204000	217000	215000	9	9	9	430000	399000	367000	9	9	9	9	9	9	9	9	9	297000	78100	647000	--
CdM263	pma0634	Positive	495.297	478.4	2.6	494.297	[M+H]+	50	30	-	N', N''-di-p-coumaroylspermine	Phenolamides	0.0483363	1150000	1060000	1060000	1030000	1720000	935000	1180000	160000	1050000	392000	712000	1110000	1510000	318000	665000	11900	1110000	1030000	1230000	43800	666000	733000	--	--
CdM266	pmb0764	Positive	144.1	142.9	2.62	143.1	[M+H]+	50	30	C04294	4-Methyl-5-thiazoleethanol	Others	0.0372931	10100000	10600000	10300000	11000000	15600000	3580000	16700000	7570000	7290000	3420000	31700000	5290000	7190000	6520000	32100000	11800000	544000	516000	15400000	4160000	1860000	2040000	C04294	ko00730,ko01100
CdM267	pme1773	Positive	595	287.9	2.62	595	Protonated	50	30	C08620	Cyanidin 3-O-rutinoside (Keracyanin)	Anthocyanins	0.129623	4860000	3950000	4100000	3590000	9	9	9	9	9	9	9	9	9	128000000	256000000	287000	9	9	9	9	9	9	ko00942
CdM270	pme3391	Positive	479	317	2.63	479	Protonated	50	30	C12139	Petunidin 3-O-glucoside	Anthocyanins	0.119207	219000	187000	242000	194000	287000	234000	189000	56900	198000	111000	9	9	9	47200	146000	96600	288000	209000	221000	139000	148000	130000
CdM272	pma2400	Positive	167.1	121.2	2.69	166.1	[M+H]+	50	30	-	Dihydrojasmone	Others	0.0287195	21300000	20800000	20200000	20000000	29700000	19600000	15200000	4990000	15300000	9260000	14500000	413000	25400000	8890000	14000000	618000	22600000	20300000	15900000	2040000	15500000	15200000	--
CdM278	pmb0086	Positive	162	145.5	2.72	161	[M+H]+	50	30	C19837	Indole carboxylic acid	Phytohormones	0.0538012	175000	179000	162000	161000	9	9	9	114000	183000	252000	145000	852000	499000	197000	236000	275000	118000	333000	56200	328000	326000	310000	--
CdM280	pme1417	Positive	161.1	144.2	2.72	160.1	[M+H]+	50	30	C00398	L-Tryptamine	Tryptamine derivatives	0.0311388	285000	298000	300000	282000	134000	205000	287000	79900	198000	206000	1140000	144000	93600	670000	887000	453000	370000	341000	226000	212000	82000	184000	ko00380,ko00901,ko01060,ko01063,ko01100,ko01110,ko04080
CdM284	pme3392	Positive	433.1	271	2.75	433.1	Protonated	50	30	-	Pelargonidin 3-O-beta-D-glucoside（Callistephin chloride)	Anthocyanins	0.126775	896000	658000	807000	762000	1140000	699000	643000	521000	662000	379000	496000	798000	1100000	242000	451000	347000	769000	713000	802000	603000	546000	659000	--
CdM286	pmb0618	Positive	627.1	430	2.76	626.1	[M+H]+	50	30	-	8-C-hexosyl-hesperetin O-hexoside	Flavone C-glycosides	0.188016	191000	165000	125000	193000	193000	1300000	2400000	9	9	9	9	9	9	9	9	9	9	9	9	9	9	9
CdM287	pma2405	Positive	280	178.4	2.77	280	Protonated	50	30	-	Feruloylcholine	Cholines	0.123588	39900	46400	50300	38900	72600	121000	169000	9	9	9	9	9	9	9	9	9	9	9	9	9	9	9
CdM288	pmb0620	Positive	787.1	344.1	2.78	786.1	[M+H]+	50	30	-	Chrysoeriol 6-C-hexoside 8-C-hexoside-O-hexoside	Flavone C-glycosides	0.0581108	291000	273000	253000	267000	9	9	9	1320000	1720000	916000	9	9	9	9	9	9	9	9	9	138000	204000	118000
CdM289	pme0399	Positive	355.095	355.1	2.8	354.095	[M+H]+	50	30	C00852	Chlorogenic acid (3-O-Caffeoylquinic acid)	Quinate and its derivatives	0.191247	49500	34400	55600	49500	64000	60800	62100	9	9	9	9	9	9	9	9	9	9	9	9	9	9	9	C00852	ko00940,ko00941,ko00945,ko01110
CdM293	pmb0812	Positive	127.1	81.2	2.82	126.1	[M+H]+	50	30	C02835	Imidazole-4-acetate	Indole derivatives	0.0903609	1230000	1290000	1060000	1110000	1840000	844000	1190000	746000	1320000	433000	884000	2260000	1060000	647000	848000	192000	1170000	1250000	1270000	591000	1000000	1320000
CdM295	pmb0475	Positive	671.2	671	2.83	670.2	[M+H]+	50	30	-	Gallic acid O-feruloyl-O-hexosyl-O-hexoside	Hydroxycinnamoyl derivatives	0.293464	209000	127000	110000	144000	9	9	9	9	9	9	130000	97600	163000	107000	153000	199000	9	9	9	196000	230000	96500	--
CdM306	pmb0621	Positive	641.1	623	2.9	640.1	[M+H]+	50	30	-	C-hexosyl-isorhamnetin O-hexoside	Flavone C-glycosides	0.165871	561000	386000	484000	559000	736000	382000	539000	592000	439000	286000	232000	525000	817000	2310000	308000	518000	606000	508000	557000	362000	356000	367000
CdM308	pmb0706	Positive	713.1	713.1	2.93	712.1	[M+H]+	50	30	-	Quercetin 5-O-malonylhexosyl-hexoside	Flavonol	0.205539	85000	61100	54000	77100	94400	461000	827000	9	9	9	9	9	9	9	9	9	9	9	9	9	9	9	--
CdM315	pmb0752	Positive	369.1	177.5	2.99	368.1	[M+H]+	50	30	C02572	3-O-Feruloyl quinic acid	Quinate and its derivatives	0.109595	36400	30200	38200	38800	9	9	9	31200	26800	22400	47900	55100	34600	9	9	9	22700	40500	31600	9	9	9	--	--
CdM317	pma1590	Positive	463.123	301.4	3	463.123	Protonated	50	30	-	Peonidin O-hexoside	Anthocyanins	0.0656113	169000	198000	189000	184000	9	9	9	232000	190000	148000	9	9	9	9	9	9	9	9	9	9	9	9
CdM323	pme2607	Positive	192.06	114.9	3.04	191.058	[M+H]+	50	30	C05635	5-Hydroxyindole-3-acetic acid	Indole derivatives	0.0895005	375000	356000	435000	374000	116000	645000	69700	489000	147000	307000	71000	335000	203000	163000	200000	1250000	336000	505000	674000	187000	378000	93000	ko00380,ko01100,ko04726
CdM328	pme0474	Positive	139.03	50.3	3.07	138.032	[M+H]+	50	30	C00156	4-Hydroxybenzoic acid	Organic acids	0.116441	721000	685000	875000	705000	751000	1130000	1500000	9	9	9	1900000	1390000	878000	497000	1920000	103000	675000	901000	448000	9	9	9	C00156	ko00130,ko00360,ko00362,ko00363,ko00623,ko00627,ko00790,ko01061,ko01100,ko01110,ko01120,ko01220,ko07110
CdM330	pme2213	Positive	181.042	135.1	3.11	180.042	[M+H]+	50	30	C01197	Caffeic acid	Hydroxycinnamoyl derivatives	0.0269711	5560000	5500000	5650000	5300000	1210000	63800000	32500000	7870000	9640000	11400000	9	9	9	9	9	9	9	9	9	545000	544000	3030000	ko00940,ko01061,ko01100,ko01110,ko01220
CdM332	pma0675	Positive	153.047	135.3	3.14	152.047	[M+H]+	50	30	-	o-Anisic acid	Organic acids	0.0367774	247000	234000	237000	226000	203000	2270000	66100	608000	31200	355000	30800	58200	71200	291000	18900	132000	53300	271000	45100	33900	63900	167000	--	--
CdM334	pmb0803	Positive	508.1	152.5	3.15	507.1	[M+H]+	50	30	-	Pyridoxine O-feruloyl hexoside	Vitamins	0.16161	192000	199000	155000	142000	9730	423000	12700	508000	14200	55300	18400	280000	19600	2130000	5960	1210000	28400	9220	7240	961000	311000	1970000	--	--
CdM338	pme1667	Positive	595.2	367.2	3.18	594.159	[M+H]+	50	30	C08064	Isovitexin 7-O-glucoside (Saponarin)	Others	0.0519581	808000	764000	721000	802000	65900	588000	217000	213000	124000	51000	122000	768000	30700	582000	689000	795000	490000	2810000	75300	3040000	4140000	2310000	--
CdM339	pmb0247	Positive	137.3	94.3	3.19	136.3	[M+H]+	50	30	C00568	p-Aminobenzoate	Benzoic acid derivatives	0.0882806	529000	612000	499000	565000	265000	529000	232000	863000	153000	721000	184000	1190000	210000	446000	169000	602000	102000	660000	217000	750000	837000	1090000	ko00627,ko00790,ko01061,ko01100,ko01120
CdM341	pma6599	Positive	207.1	147.4	3.21	206.1	[M+H]+	50	30	-	6-Hydroxymethylherniarin	Hydroxycinnamoyl derivatives	0.210948	32700	40400	41400	25600	9	9	9	42500	30600	18700	47800	134000	90900	44000	77000	167000	9	9	9	40100	39800	60100	--
CdM342	pmb0712	Positive	655.2	331.7	3.21	654.2	[M+H]+	50	30	-	Tricin 5-O-hexosyl-O-hexoside	Flavone	0.382406	342000	456000	184000	251000	673000	232000	614000	297000	1280000	271000	891000	133000	1650000	288000	178000	233000	214000	326000	438000	9	9	9	--
CdM343	pmb1178	Positive	339.1	177.5	3.21	338.1	[M+H]+	50	30	-	O-Feruloyl 2-hydroxylcoumarin	Coumarins	0.110613	1530000	1790000	1600000	1950000	72700	237000	44300	370000	60900	2010000	129000	515000	112000	500000	105000	5020000	290000	12100000	191000	5590000	2840000	1180000	--
CdM344	pme1952	Positive	377	243.2	3.21	376.138	[M+H]+	50	30	C00255	Riboflavin	Vitamins	0.0594034	13300000	12500000	12600000	11500000	8510000	4850000	30800000	8250000	18500000	4140000	21900000	15600000	23800000	15600000	16100000	9380000	2540000	1860000	5990000	9830000	3030000	6310000	ko00740,ko01100,ko01110,ko04977
CdM345	pmb0635	Positive	933.1	933.7	3.23	932.1	[M+H]+	50	30	-	C-hexosyl-apigenin O-feruloylhexoside-O-hexoside	Flavone C-glycosides	0.202434	138000	101000	168000	148000	606000	461000	315000	9	9	9	9	9	9	9	9	9	9	9	9	9	9	9	--
CdM346	pme2786	Positive	219	160.1	3.23	218.106	[M+H]+	50	30	C00978	N-Acetyl-5-hydroxytryptamine	Tryptamine derivatives	0.0611115	481000	423000	473000	438000	391000	73000	804000	49100	422000	229000	984000	224000	267000	856000	1500000	211000	1160000	1170000	593000	227000	272000	33100
CdM350	pme0388	Positive	183.058	137.1	3.25	182.058	[M+H]+	50	30	C05582	Homovanillic acid	Hydroxycinnamoyl derivatives	0.287001	871000	595000	481000	516000	9	9	9	9	9	9	9	9	9	7690000	5280000	2870000	9	9	9	2150000	981000	4880000	C05582	ko00350,ko01100,ko04728
CdM351	pma0680	Positive	484.242	484.1	3.26	483.242	[M+H]+	50	30	-	N', N''-Feruloyl,caffeoylspermidine	Phenolamides	0.119426	27000	25700	20400	25900	9	9	9	9	9	9	9	9	9	20900	41400	61900	9	9	9	48800	41600	34300	--
CdM353	pmb0587	Positive	639.1	640	3.27	638.1	[M+H]+	50	30	-	Chrysoeriol O-glucuronic acid-O-hexoside	Flavone	0.197655	41100	58300	67800	56600	97300	138000	178000	9	9	9	91800	79900	67900	59100	48000	70200	9	9	9	9	9	9	--
CdM357	pmb0545	Positive	477.1	315.6	3.31	477.1	Protonated	50	30	-	Rosinidin O-hexoside	Anthocyanins	0.0832277	2880000	2920000	2870000	3390000	9	9	9	5290000	5270000	5250000	9	9	9	1060000	3100000	5140000	9	9	9	3120000	5600000	8070000
CdM359	pme3564	Positive	179.03	179	3.31	178.027	[M+H]+	50	30	C03093	Daphnetin	Coumarins	0.107266	558000	466000	435000	494000	9	9	9	243000	385000	527000	201000	1470000	836000	113000	57900	160000	225000	2930000	1580000	632000	818000	1400000	--
CdM360	pme1472	Positive	169.042	111	3.32	168.042	[M+H]+	50	30	C06672	Vanillic acid	Hydroxycinnamoyl derivatives	0.0371509	1410000	1330000	1370000	1450000	262000	2470000	179000	1510000	211000	1690000	216000	1190000	171000	1470000	168000	200000	59200	3640000	233000	2290000	402000	2920000	ko00627,ko01120
CdM365	pma0692	Positive	438.239	147.5	3.37	437.239	[M+H]+	50	30	-	N', N''-di-p-coumaroylspermidine	Phenolamides	0.166756	1550000	1480000	1900000	2100000	11100000	10900000	10700000	9	9	9	1070000	654000	238000	9	9	9	9	9	9	9	9	9	--
CdM366	pmb0645	Positive	627.1	447.3	3.37	626.1	[M+H]+	50	30	-	6-C-hexosyl-hesperetin O-hexoside	Flavone C-glycosides	0.157647	110000	119000	110000	81000	306000	273000	239000	210000	259000	160000	110000	79400	48700	9	9	9	345000	142000	548000	9	9	9
CdM370	pmb0647	Positive	581.1	449.2	3.38	580.1	[M+H]+	50	30	-	8-C-hexosyl-luteolin O-pentoside	Flavone C-glycosides	0.187182	212000	223000	190000	142000	9	9	9	166000	153000	139000	68200	405000	237000	453000	405000	356000	136000	912000	524000	458000	700000	406000
CdM371	pme2743	Positive	194.1	135.1	3.38	193.074	[M+H]+	50	30	C05598	N-Phenylacetylglycine	Amino acid derivatives	0.293073	130000	108000	109000	192000	9	9	9	9	9	9	9	9	9	9	9	9	89600	709000	399000	205000	420000	398000	C05598	ko00360
CdM372	pme2812	Positive	249	190.2	3.38	248.116	[M+H]+	50	30	C05643	6-Hydroxymelatonin	Tryptamine derivatives	0.208469	21900	20100	31400	22900	9	9	9	9	9	9	9	9	9	9	9	9	9	9	9	43700	46600	66300
CdM373	pmb0695	Positive	771.1	771	3.39	770.1	[M+H]+	50	30	-	C-hexosyl-chrysoeriol O-rutinoside	Flavone C-glycosides	0.272361	76300	55400	82800	45000	186000	50000	119000	127000	161000	93200	9	9	9	9	9	9	9	9	9	9	9	9	--
CdM374	pmb0696	Positive	625	397.8	3.41	624	[M+H]+	50	30	-	8-C-hexosyl chrysoeriol O-hexoside	Flavone C-glycosides	0.224672	309000	353000	269000	203000	1380000	1060000	735000	705000	898000	512000	550000	416000	282000	9	9	9	9	9	9	9	9	9
CdM378	pmb0108	Positive	375.2	137.6	3.43	374.2	[M+H]+	50	30	-	Feruloyl syringic acid	Hydroxycinnamoyl derivatives	0.279488	78100	62500	53800	39100	30000	51100	40600	194000	22400	108000	106000	173000	32900	42400	40400	131000	28700	36400	44100	98600	53700	69400	--	--
CdM379	pmb0713	Positive	655.2	331.7	3.45	654.2	[M+H]+	50	30	-	Tricin 7-O-hexosyl-O-hexoside	Flavone	0.354405	54600	70500	29400	73600	193000	70300	132000	59600	267000	77200	194000	37100	238000	128000	61800	94900	68800	74600	80300	9	9	9	--
CdM381	pma6499	Positive	509.3	347.9	3.46	508.3	[M+H]+	50	30	-	Limocitrin O-hexoside	Flavone	0.303087	125000	111000	127000	58700	9	9	9	200000	132000	64700	9	9	9	9	9	9	186000	153000	170000	9	9	9	--
CdM386	pma6647	Positive	625.2	463.6	3.49	624.2	[M+H]+	50	30	-	C-hexosyl-chrysoeriol O-hexoside	Flavone C-glycosides	0.109414	249000	236000	200000	203000	9	9	9	9	9	9	244000	229000	214000	68800	238000	580000	310000	331000	289000	9	9	9
CdM391	pme0059	Positive	325.2	307.5	3.52	324.184	[M+H]+	50	30	C06526	Quinine	Alkaloids	0.0773168	67100	63000	62300	73500	318000	45400	76800	12900	60200	21600	115000	119000	74100	22400	112000	57600	22400	35100	38500	16800	37200	25400	ko01063,ko04742,ko04976
CdM393	pme2698	Positive	313.4	120	3.52	312.147	[M+H]+	50	30	-	Phe-Phe	Amino acid derivatives	0.322641	35300	55300	25600	48400	9	9	9	9	9	9	78100	33700	55900	9	9	9	9	9	9	29300	34000	31700	--	--
CdM394	pma0170	Positive	498.261	323	3.53	497.261	[M+H]+	50	30	-	N', N''-Diferuloylspermidine	Phenolamides	0.162971	24200	31000	35300	34700	138000	109000	80300	9	9	9	9	9	9	9	9	9	9	9	9	9	9	9	--
CdM396	pma0249	Positive	479.118	302.8	3.54	478.118	[M+H]+	50	30	-	Selgin 5-O-hexoside	Flavone	0.0816781	17600000	21400000	20300000	19400000	13800000	12800000	11700000	19900000	39300000	432000	36700000	18400000	157000	82100	234000	547000	9	9	9	221000	47100	134000	--
CdM398	pme1540	Positive	625.169	317.1	3.54	624.169	[M+H]+	50	30	-	Isorhamnetin 3-O-neohesperidoside	Flavonol	0.173617	104000	146000	135000	105000	33500	48500	63400	9	9	9	198000	114000	29000	24200	21000	27400	14900	16600	13100	9	9	9
CdM401	pme0202	Positive	611.153	303	3.56	610.153	[M+H]+	50	30	C05625	Quercetin 3-O-rutinoside (Rutin)	Flavonol	0.0211484	417000	397000	412000	412000	109000	101000	1270000	72500	227000	117000	327000	50500	102000	18400	2840000	53300	129000	88700	1490000	136000	59900	8230	ko00944,ko01100,ko01110
CdM403	pme0419	Positive	167.063	149.1	3.57	166.063	[M+H]+	50	30	C01744	3-(4-Hydroxyphenyl)propionic acid	Hydroxycinnamoyl derivatives	0.0818317	1660000	1380000	1510000	1430000	9	9	9	4430000	4170000	3900000	9	9	9	9	9	9	646000	4570000	2610000	3010000	2870000	4170000	--	--
CdM404	pme3425	Positive	209.2	194.1	3.57	208.037	[M+H]+	50	30	C09265	6-Methoxy-7,8-DihydroxyCoumarin	Coumarins	0.0221565	366000	368000	383000	379000	125000	339000	232000	465000	56900	388000	238000	424000	52900	479000	442000	405000	260000	2340000	153000	806000	1200000	957000	--
CdM407	pma6254	Positive	757.3	757.2	3.61	756.3	[M+H]+	50	30	-	C-hexosyl-apigenin O-caffeoylhexoside	Flavone C-glycosides	0.0883255	3580000	3200000	3470000	2930000	14200000	729000	6050000	3340000	4890000	1710000	2820000	3500000	4180000	9	9	9	9	9	9	9	9	9	--
CdM408	pmb0312	Positive	176.1	133.4	3.63	175.1	[M+H]+	50	30	-	5-methoxyindole-3-carbaldehyde	Indole derivatives	0.0424918	115000	118000	120000	127000	9	9	9	9	9	9	9	9	9	9	9	9	79700	128000	104000	166000	512000	355000	--
CdM410	pmb0711	Positive	611.2	303.7	3.64	610.2	[M+H]+	50	30	-	Quercetin 7-O-rutinoside	Flavonol	0.099862	529000	442000	451000	425000	140000	90100	1320000	82800	212000	98000	357000	69000	108000	36400	2940000	52100	128000	91500	1330000	104000	41600	72800	--
CdM411	pme0401	Positive	369.111	163	3.65	368.111	[M+H]+	50	30	-	Chlorogenic acid methyl ester	Quinate and its derivatives	0.0590894	2230000	2070000	2070000	1930000	9	9	9	4820000	2920000	6720000	9	9	9	4020000	4170000	3860000	129000	892000	2240000	150000	618000	2220000	--
CdM418	pme2671	Positive	123.04	76.9	3.68	122.037	[M+H]+	50	30	C00633	4-Hydroxybenzaldehyde	Benzoic acid derivatives	0.0171135	4280000	4390000	4460000	4400000	6790000	6180000	5560000	2430000	3460000	2640000	5480000	2480000	5080000	1230000	5580000	1200000	4620000	3400000	6290000	2070000	4430000	1070000	ko00363,ko00623,ko00627,ko01061,ko01100,ko01120
CdM421	pme1709	Positive	138.05	78	3.69	137.048	[M+H]+	50	30	-	Nicotinic Acid Methyl Ester (Methyl Nicotinate)	Vitamins	0.0775126	540000	589000	651000	582000	458000	119000	1790000	198000	1110000	87200	918000	675000	761000	220000	986000	245000	166000	290000	317000	260000	393000	175000	--	--
CdM422	pme1980	Positive	175.1	83.1	3.7	174.089	[M+H]+	50	30	C08278	Suberic acid	Organic acids	0.0868059	104000	88200	108000	104000	98100	160000	50300	44800	74400	59000	418000	118000	83700	31200	160000	32100	58600	198000	191000	67800	30100	114000	--
CdM424	pmb0663	Positive	611.1	299.8	3.71	610.1	[M+H]+	50	30	-	8-C-hexosyl-luteolin O-hexoside	Flavone C-glycosides	0.0285202	41000000	39300000	41900000	39900000	33500000	29900000	26200000	9	9	9	72300000	17900	36200000	9	9	9	9	9	9	9	9	9
CdM426	pma0104	Positive	369.119	207.5	3.72	368.119	[M+H]+	50	30	-	N-sinapoyl hydroxycoumarin	Coumarins	0.0292768	1150000	1120000	1190000	1190000	9	9	9	1430000	1140000	853000	9	9	9	1150000	666000	182000	9	9	9	9	9	9	--	--
CdM431	pmb1240	Positive	503.2	311.8	3.74	502.2	[M+H]+	50	30	-	Phellodensin F	Others	0.057638	23200000	21200000	22700000	20500000	2770000	23900000	738000	35700000	763000	48900000	1950000	90500000	801000	18800000	6520000	27600000	17200000	79400000	5970000	56000000	40100000	47900000	--	--
CdM433	pme1698	Positive	225.069	149.1	3.74	224.069	[M+H]+	50	30	C00482	Sinapic acid	Hydroxycinnamoyl derivatives	0.231323	72200	71200	67500	41400	55300	71300	87200	9	9	9	129000	140000	151000	9	9	9	9	9	9	9	9	9	ko00940,ko01061,ko01100,ko01110
CdM434	pmb0590	Positive	461.1	257.4	3.75	460.1	[M+H]+	50	30	-	Acacetin O-glucuronic acid	Flavone	0.0748513	498000	439000	424000	433000	113000	602000	1090000	9	9	9	743000	466000	188000	1040000	2050000	26800	121000	69900	64900	9	9	9	--
CdM438	pme2459	Positive	449.1	287.1	3.77	448.101	[M+H]+	50	30	C03951	Luteolin 7-O-glucoside (Cynaroside)	Flavone	0.0608106	873000	779000	897000	835000	1990000	92800	1020000	78500	1010000	69200	2600000	173000	1390000	9	9	9	9	9	9	9	9	9	C03951	ko00944
CdM440	pmb0426	Positive	219.1	189.5	3.78	218.1	[M+H]+	50	30	C08309	5-Methoxy-N,N-dimethyltryptamine	Tryptamine derivatives	0.0346127	379000	373000	389000	358000	231000	555000	34700	692000	38000	398000	196000	1150000	75900	96800	188000	154000	1080000	1010000	121000	708000	779000	880000
CdM443	pmb0769	Positive	485.1	147.5	3.78	484.1	[M+H]+	50	30	-	N-hexosyl-p-coumaroyl serotonin	Tryptamine derivatives	0.271827	317000	227000	380000	217000	49000	290000	170000	376000	470000	564000	43600	1010000	22400	174000	120000	401000	213000	926000	110000	712000	511000	556000
CdM450	pma6218	Positive	419.1	383.9	3.81	418.1	[M+H]+	50	30	-	O-methylnaringenin C-pentoside	Flavone C-glycosides	0.246351	197000	372000	323000	308000	194000	537000	168000	383000	126000	520000	161000	520000	84200	897000	154000	1010000	99700	972000	142000	693000	548000	653000
CdM451	pma6373	Positive	671.1	356	3.81	670.1	[M+H]+	50	30	-	3',4',5'-Dihydrotricetin O-hexosyl-O-hexoside	Flavone	0.365557	83600	52100	61200	33000	196000	77800	44500	81400	37100	37600	61200	41500	78400	101000	25000	64300	40700	7110	226000	48500	34500	29000	--	--
CdM457	pma0214	Positive	479	317.3	3.84	478	[M+H]+	50	30	-	methylQuercetin O-hexoside	Flavonol	0.119143	12400000	10300000	10400000	9400000	8710000	7580000	6440000	9	9	9	9	9	9	9	9	9	9	9	9	9	9	9
CdM458	pmb0382	Positive	339.1	177.5	3.84	338.1	[M+H]+	50	30	-	O-Feruloyl 4-hydroxylcoumarin	Coumarins	0.0830903	9930000	9170000	10300000	11200000	416000	14100000	7260000	2340000	3660000	4970000	9	9	9	626000	10200000	19700000	10600000	35500000	1740000	57300000	38600000	15400000	--
CdM460	pme3130	Positive	465	302.9	3.85	464.096	[M+H]+	50	30	-	Quercetin 4'-O-glucoside (Spiraeoside)	Flavonol	0.053328	4240000	4430000	4330000	3910000	1470000	20200000	38900000	51700	2630000	1340000	9	9	9	165000	256000	73000	9	9	9	9	9	9	--
CdM464	pme0331	Positive	581.179	57.1	3.92	580.179	[M+H]+	50	30	C09789	Naringenin 7-O-neohesperidoside (Naringin)	Flavanone	0.0623095	678000	666000	728000	626000	1560000	1830000	2100000	9	9	9	2360000	2020000	1670000	2260000	4350000	164000	77800	62800	1010000	9	9	9	ko00941
CdM465	pme3210	Positive	433	270.9	3.93	432.106	[M+H]+	50	30	C09126	Genistein 7-O-Glucoside (Genistin)	Isoflavone	0.0247436	1390000	1450000	1370000	1390000	471000	1960000	3450000	9	9	9	4390000	2260000	138000	475000	834000	115000	62400	581000	129000	9	9	9	ko00943
CdM466	pme3268	Positive	449	286.9	3.93	448.101	[M+H]+	50	30	C12626	Kaempferol 3-O-galactoside (Trifolin)	Flavonol	0.0726889	1100000	1240000	1050000	1170000	2820000	131000	1480000	78900	1220000	91000	3150000	291000	159000	9	9	9	72900	247000	160000	731000	381000	1080000	ko00944
CdM467	pmb0680	Positive	741.2	740.9	3.94	740.2	[M+H]+	50	30	-	C-hexosyl-apigenin O-p-coumaroylhexoside	Flavone C-glycosides	0.106828	295000	290000	278000	231000	848000	176000	245000	117000	177000	75200	226000	230000	234000	9	9	9	9	9	9	9	9	9
CdM469	pme2060	Positive	204.251	136.1	3.95	203.117	[M+H]+	50	30	C04083	N6-Isopentenyladenine (iP)	Phytohormones	0.044522	160000	146000	148000	157000	158000	12500	51800	29100	49700	8450	286000	14700	125000	20800	213000	10500	27900	68700	161000	918000	82100	306000	ko00908,ko01110,ko04075
CdM471	pme0368	Positive	579.164	271.1	3.96	578.164	[M+H]+	50	30	-	Apigenin 7-rutinoside (Isorhoifolin)	Flavone	0.0505387	2060000	1870000	1860000	1870000	2730000	58500	2300000	33200	2070000	67500	5250000	56100	517000	29300	3570000	242000	422000	371000	320000	9	9	9	--
CdM473	pma0294	Positive	463.123	313.9	3.98	462.123	[M+H]+	50	30	-	Chrysoeriol 5-O-hexoside	Flavone	0.257902	90100	175000	150000	158000	36600	91800	71100	144000	30300	52600	397000	126000	37900	57600	62300	52800	256000	143000	30700	66200	413000	290000	--
CdM474	pma1116	Positive	301.1	259.1	3.98	300.1	[M+H]+	50	30	C10098	Kaempferide	Flavonol	0.159025	48900	72100	63300	67300	9	9	9	22700	90700	56700	9	9	9	9	9	9	9	9	9	9	9	9
CdM482	pmb0595	Positive	479.2	317.8	4	478.2	[M+H]+	50	30	-	Isorhamnetin 5-O-hexoside	Flavonol	0.0667151	33100000	30000000	31800000	28400000	31100000	42100000	53000000	29900000	59700000	78400	9	9	9	9	9	9	9	9	9	9	9	9
CdM483	pme2950	Positive	611.19	303	4	610.19	[M+H]+	50	30	C09755	Hesperetin 7-rutinoside (Hesperidin)	Flavanone	0.0394547	122000	116000	121000	112000	264000	36000	56000	17200	39000	62700	149000	61600	244000	38500	91100	70100	99800	67900	186000	31100	46200	17400
CdM484	pme2993	Positive	193.1	178.1	4	192.042	[M+H]+	50	30	C01752	Scopoletin (7-Hydroxy-5-methoxycoumarin)	Coumarins	0.230413	498000	280000	422000	379000	303000	517000	89400	943000	214000	1780000	176000	1770000	33000	350000	243000	479000	428000	960000	141000	3130000	407000	478000	ko00940,ko01061,ko01110
CdM485	pmb0569	Positive	509.2	347.6	4.01	508.2	[M+H]+	50	30	-	Syringetin 5-O-hexoside	Flavone	0.114406	1010000	982000	1130000	853000	9	9	9	9	9	9	190000	915000	1640000	2290000	3200000	1380000	9	9	9	9	9	9	--
CdM486	pmb0674	Positive	685.1	685	4.01	684.1	[M+H]+	50	30	-	C-pentosyl apigenin O-salicyloyl hexoside	Flavone C-glycosides	0.148823	2890000	3390000	2590000	3610000	3140000	107000	3390000	136000	3570000	3540000	3450000	3060000	2670000	155000	2750000	1460000	26600	227000	3100000	87900	79300	115000
CdM490	pme0333	Positive	579.164	271.1	4.02	578.164	[M+H]+	50	30	C12627	Apigenin 7-O-neohesperidoside (Rhoifolin)	Flavone	0.0365028	1910000	1950000	1890000	2050000	2660000	2470000	2270000	1090000	2110000	68000	5380000	45000	560000	1660000	3150000	161000	428000	383000	337000	9	9	9	C12627	ko00944
CdM492	pmb0600	Positive	609.4	301.7	4.03	608.4	[M+H]+	50	30	-	Chrysoeriol 7-O-rutinoside	Flavone	0.0786853	88500	88600	74800	87100	92000	64300	36500	40500	42000	38900	414000	225000	35000	55600	77500	33700	9	9	9	9	9	9	--	--
CdM495	pme0002	Positive	611.2	303.1	4.04	610.19	[M+H]+	50	30	C09806	Hesperetin 7-O-neohesperidoside (Neohesperidin)	Flavanone	0.0893937	108000	105000	106000	88300	204000	39000	67900	9	9	9	123000	60800	288000	29400	124000	53000	97800	72000	197000	34600	58300	46500	ko00941
CdM497	pmb0604	Positive	449.1	287.6	4.05	448.1	[M+H]+	50	30	C12249	Kaempferol 3-O-glucoside (Astragalin)	Flavonol	0.109544	28300	36500	31800	30400	123000	14900	108000	28100	35200	16500	9	9	9	102000	164000	225000	53800	146000	99900	266000	68600	91400	ko00944,ko01110
CdM498	pmb0675	Positive	711.2	693.1	4.05	710.2	[M+H]+	50	30	-	C-pentosyl-apigenin O-p-coumaroylhexoside	Flavone C-glycosides	0.119946	572000	541000	446000	463000	9	9	9	1540000	1140000	731000	941000	937000	933000	322000	845000	202000	9	9	9	17800	39100	60400	--
CdM503	pmb0602	Positive	509.3	283.6	4.1	508.3	[M+H]+	50	30	-	Syringetin 7-O-hexoside	Flavone	0.0594534	989000	872000	912000	876000	219000	131000	43800	9	9	9	171000	826000	1480000	2170000	3030000	1310000	9	9	9	9	9	9	--
CdM504	pma6639	Positive	479.2	318	4.11	478.2	[M+H]+	50	30	-	Isorhamnetin O-hexoside	Flavonol	0.0531408	33500000	32400000	32100000	29500000	31700000	41700000	51700000	29000	58700000	73700	19300000	9650000	7750	9	9	9	9	9	9	9	9	9
CdM506	pmb0603	Positive	625.1	331.7	4.12	624.1	[M+H]+	50	30	-	Chrysoeriol O-hexosyl-O-hexoside	Flavone	0.224635	43300	32000	32200	25300	46600	30300	13900	9	9	9	9	9	9	9	9	9	12200	4530	19800	9	9	9	--	--
CdM508	pme3456	Positive	149.1	131	4.12	148.052	[M+H]+	50	30	-	p-Coumaraldehyde	Hydroxycinnamoyl derivatives	0.153791	881000	1040000	1280000	1120000	9	9	9	1060000	1100000	1140000	9	9	9	9	9	9	256000	2190000	1220000	1580000	1230000	3660000	ko00940,ko01061,ko01100,ko01110
CdM510	pmb0605	Positive	433.1	271.7	4.15	432.1	[M+H]+	50	30	C04608	Apigenin 7-O-glucoside (Cosmosiin)	Flavone	0.0495615	1190000	1290000	1150000	1190000	445000	1810000	3180000	9	9	9	4180000	2140000	108000	397000	708000	85500	65500	109000	153000	9	9	9	C04608	ko00944
CdM512	pmc0682	Positive	133.1	105	4.16	132.1	[M+H]+	50	30	-	4-Aminoindole	Indole derivatives	0.234777	546000	499000	397000	316000	9	9	9	410000	379000	347000	9	9	9	9	9	9	9	9	9	897000	444000	1440000	--
CdM515	pmb0606	Positive	477.1	287	4.18	476.1	[M+H]+	50	30	-	Chrysoeriol O-glucuronic acid	Flavone	0.0444236	594000	539000	544000	559000	200000	510000	819000	534000	882000	186000	2810000	1470000	133000	20700	657000	57300	9	9	9	9	9	9	--
CdM519	pmb0358	Positive	641.1	479.5	4.23	640.1	[M+H]+	50	30	-	Selgin O-hexosyl-O-hexoside	Flavone	0.0780558	350000	308000	292000	326000	1170000	126000	329000	384000	336000	460000	321000	348000	375000	9	9	9	9	9	9	9	9	9	--	--
CdM522	pma6576	Positive	347	288	4.25	346	[M+H]+	50	30	-	Spinacetin	Flavone	0.23316	40700	33900	51600	57800	9	9	9	9	9	9	13200	161000	50400	23900	93500	62200	27400	44400	10400	35600	39400	43200	--
CdM524	pmb0607	Positive	463.2	287.7	4.25	462.2	[M+H]+	50	30	-	Chrysoeriol 7-O-hexoside	Flavone	0.147215	139000	191000	195000	187000	39000	162000	61300	177000	36400	49500	465000	149000	33400	32100	70200	55500	255000	56100	38100	70800	365000	360000	--
CdM525	pmb0681	Positive	403.1	367.6	4.25	402.1	[M+H]+	50	30	-	Apigenin 8-C-pentoside	Flavone C-glycosides	0.264093	60400	42400	80500	55800	9	9	9	98900	75600	52300	26500	372000	199000	111000	136000	160000	30900	371000	201000	252000	264000	460000
CdM528	pme3143	Positive	177	121	4.31	176.047	[M+H]+	50	30	-	6-Hydroxy-4-methylcoumarin	Coumarins	0.224174	106000	60000	84000	86100	9	9	9	69900	116000	163000	9	9	9	9	9	9	49400	360000	205000	455000	214000	593000	--
CdM529	pma0760	Positive	565	317.8	4.32	564	[M+H]+	50	30	-	Selgin O-malonylhexoside	Flavone	0.073522	18900000	21200000	19600000	17800000	14700000	19700000	24700000	9	9	9	8220000	4110000	4940	245000	384000	106000	9	9	9	9	9	9	--	--
CdM532	pmb0813	Positive	176.1	133.5	4.34	175.1	[M+H]+	50	30	-	1-Methoxyindole-3-carbaldehyde	Indole derivatives	0.120468	97100	114000	89800	88500	54700	190000	56000	69300	34700	128000	182000	302000	35000	42100	345000	194000	87700	157000	122000	248000	261000	716000	--
CdM533	pme1453	Positive	233	174.1	4.35	232.121	[M+H]+	50	30	C01598	Melatonin	Tryptamine derivatives	0.15895	168000	116000	144000	130000	9	9	9	72600	75200	77800	9	9	9	78600	23800	55000	390000	1230000	810000	1280000	212000	887000	ko00380,ko01100,ko04080,ko04713
CdM540	pme0249	Positive	189.105	97	4.43	188.105	[M+H]+	50	30	C08261	Azelaic acid	Organic acids	0.164052	54500	38300	40400	48200	30300	67900	11900	30400	20700	97200	31500	105000	21000	39700	34400	76200	175000	185000	29800	63100	85200	45100	--
CdM543	pmb0576	Positive	519	271.7	4.45	518	[M+H]+	50	30	-	Apigenin O-malonylhexoside	Flavone	0.0340456	130000	132000	122000	127000	45700	246000	446000	69600	76700	84100	190000	89400	27500	64800	101000	123000	9	9	9	9	9	9	--	--
CdM546	pma0791	Positive	521	317.6	4.46	520	[M+H]+	50	30	-	Naringenin O-malonylhexoside	Flavanone	0.0747693	979000	1040000	1050000	889000	256000	63400	2590000	47700	81500	39800	1020000	57700	374000	250000	720000	2690000	119000	419000	473000	176000	916000	726000	--
CdM550	pme2723	Positive	146.1	118.1	4.49	145.053	[M+H]+	50	30	C08493	Indole-3-carboxaldehyde	Indole derivatives	0.0212982	6960000	6980000	7210000	7250000	8110000	1430000	4400000	4800000	3200000	2100000	10200000	7970000	1700000	3130000	6240000	10800000	7410000	1880000	2760000	42200000	13400000	24800000	--
CdM553	pmb0720	Positive	579.1	331.7	4.5	578.1	[M+H]+	50	30	-	Tricin O-malonylhexoside	Flavone	0.172034	95300	70900	69800	67400	34500	26900	19200	9	9	9	9	9	9	9	9	9	9	9	9	9	9	9	--	--
CdM554	pmb1318	Positive	457.2	191.5	4.51	456.2	[M+H]+	50	30	-	8-Methyl-2-oxo-4-phenyl-2H-chromen-7-yl 4-(hexyloxy)benzoate	Benzoic acid derivatives	0.0577305	3070000	2860000	2670000	2930000	255000	1930000	313000	6160000	929000	5640000	552000	24200000	399000	13000000	1080000	11700000	668000	2650000	161000	10700000	1870000	6120000	--	--
CdM555	pma0795	Positive	551	347.4	4.52	550	[M+H]+	50	30	-	Tricetin O-malonylhexoside	Flavone	0.198847	117000	74900	118000	117000	111000	114000	116000	73200	90600	108000	63800	67000	70100	77400	52000	520000	9	9	9	9	9	9	--	--
CdM556	pmb0608	Positive	549.1	301.7	4.52	548.1	[M+H]+	50	30	-	Chrysoeriol O-malonylhexoside	Flavone	0.201732	42400	43900	57700	63800	9	9	9	9	9	9	57400	194000	126000	9	9	9	9	9	9	52100	186000	215000	--	--
CdM567	pmb0785	Positive	130.1	128.4	4.64	129.1	[M+H]+	50	30	C06323	Isoquinoline	Alkaloids	0.154553	197000	277000	238000	277000	141000	34400	93000	110000	82500	64300	366000	454000	57900	39600	258000	425000	647000	412000	177000	1550000	467000	827000
CdM577	pmb0500	Positive	411.1	177.5	4.74	410.1	[M+H]+	50	30	-	N',N"-p-coumaroyl-feruloyl putrescine	Phenolamides	0.154089	12600	10500	8650	10300	43100	24500	5810	9	9	9	9	9	9	9	9	9	9	9	9	9	9	9	--	--
CdM579	pme3279	Positive	287	217.1	4.79	286.048	[M+H]+	50	30	C12134	2'-Hydroxygenistein	Isoflavone	0.0191468	991000	1000000	1030000	988000	229000	1870000	3510000	19800	3610000	1810000	9	9	9	9	9	9	9	9	9	9	9	9
CdM583	pme1572	Positive	287.048	241.1	4.83	286.048	[M+H]+	50	30	C10510	Orobol (5,7,3',4'-tetrahydroxyisoflavone)	Isoflavone	0.0250936	170000	172000	163000	165000	31700	352000	672000	9	9	9	9	9	9	9	9	9	9	9	9	9	9	9	--
CdM584	pme2975	Positive	677.2	369.2	4.83	676.237	[M+H]+	50	30	C17555	Icariin (kaempferol 3,7-O-diglucoside 8-prenyl derivative)	Flavonol	0.0394472	666000	663000	655000	611000	9	9	9	9	9	9	9	9	9	17300000	11500000	5700000	9	9	9	404000	159000	395000	--
CdM585	pme0265	Positive	203.121	93	4.84	202.12	[M+H]+	50	30	C08277	Sebacate	Organic acids	0.285528	102000	80200	103000	51800	34900	40700	29100	9	9	9	84100	438000	261000	553000	439000	324000	9	9	9	304000	631000	243000	--
CdM594	pmb0580	Positive	417.1	255.7	4.95	416.1	[M+H]+	50	30	-	Chrysin 5-O-glucoside (Toringin)	Flavone	0	9	9	9	9	9	9	9	9	9	9	9	9	9	41700	105000	185000	9	9	9	9	9	9	--
CdM595	pma6199	Positive	417.2	255.8	4.96	416.2	[M+H]+	50	30	-	Chrysin O-hexoside	Flavone	0	9	9	9	9	9	9	9	9	9	9	9	9	9	49300	99100	113000	9	9	9	9	9	9	--
CdM603	pme1583	Positive	289.063	153.1	5.03	288.063	[M+H]+	50	30	C05631	Eriodictyol	Flavanone	0.0346372	150000	152000	157000	162000	100000	188000	275000	9	9	9	464000	240000	16400	221000	423000	19900	123000	50800	196000	9	9	9
CdM606	pme3052	Positive	333.2	287.1	5.08	332.162	[M+H]+	50	30	C02035	Gibberellin A20	Phytohormones	0.360961	79300	142000	89500	171000	299000	558000	39500	9	9	9	9	9	9	551000	809000	292000	374000	270000	165000	9	9	9	ko00904,ko01100,ko01110
CdM623	pme1578	Positive	271.053	215.1	5.45	270.053	[M+H]+	50	30	C06563	Genistein (4',5,7-Trihydroxyisoflavone)	Isoflavone	0.0299977	192000	184000	192000	198000	118000	452000	785000	9	9	9	9	9	9	9	9	9	9	9	9	9	9	9	ko00943,ko01061,ko01110
CdM630	pme2988	Positive	149.2	107	5.6	148.052	[M+H]+	50	30	C02274	3,4-Dihydrocoumarin	Coumarins	0.0767128	33200	38600	38300	39600	39600	43400	47100	9	9	9	142000	186000	32300	60200	72600	37800	9	9	9	9	9	9	ko00624,ko01120
CdM631	pme3475	Positive	273.07	153.1	5.6	272.069	[M+H]+	50	30	C09614	Butin	Flavone	0.0121792	2110000	2150000	2130000	2090000	1350000	43500	5640000	29900	1290000	41400	5880000	38400	279000	35900	3180000	103000	27800	18800	349000	26200	33300	22400	ko00941
CdM632	pme0379	Positive	271.053	215.1	5.62	270.053	[M+H]+	50	30	C01477	Apigenin	Flavone	0.0196449	75000000	74200000	76400000	72900000	50000000	38800	314000000	942000	179000000	549000	2950000	73800	481000	434000	833000	35200	16500	115000	76300	9	9	9	ko00941,ko00943,ko00944,ko01061,ko01100,ko01110
CdM634	pmb0277	Positive	331.1	315.8	5.69	330.1	[M+H]+	50	30	-	Tricin	Flavone	0.194788	33200	20900	28100	24800	27400	28700	38200	28100	17600	49100	20100	16900	27500	17200	28100	40700	32700	17800	22600	17400	23200	16400	--
CdM637	pme2321	Positive	303.079	303.1	5.72	302.079	[M+H]+	50	30	C01709	Hesperetin	Flavanone	0.0325817	154000	160000	163000	152000	325000	268000	210000	152000	169000	135000	491000	283000	75000	9	9	9	9	9	9	9	9	9
CdM638	pme0364	Positive	301.063	286.1	5.73	300.063	[M+H]+	50	30	C04293	Chrysoeriol	Flavone	0.0363176	967000	970000	967000	899000	204000	1460000	2710000	3200000	6380000	29300	548000	304000	60400	9	9	9	9	9	9	9	9	9	ko00944
CdM645	pme0424	Positive	133.058	115	5.83	132.058	[M+H]+	50	30	C00903	trans-cinnamaldehyde	Hydroxycinnamoyl derivatives	0.095563	94500	96500	77800	94000	99500	122000	38400	92600	43200	73800	76800	123000	46400	146000	113000	178000	134000	98200	67200	49400	140000	106000	ko00940,ko01060,ko01100,ko01110,ko04750
CdM646	pme2732	Positive	187.1	141.1	5.87	186.068	[M+H]+	50	30	C13014	1-Naphthylacetic acid	Phytohormones	0.0778052	33400	37000	40300	36000	17600	68500	18000	43700	20400	34200	47300	72100	24100	16100	56000	81900	60700	11100	32300	35300	28500	36400
CdM649	pma2172	Positive	268	131.3	5.91	267	[M+H]+	50	30	-	Cinnamoyl tyramine	Tryptamine derivatives	0.098391	60200	61000	73000	60300	33900	81000	128000	9	9	9	716000	380000	44500	36600	89100	62900	9	9	9	9	9	9	--
CdM652	pmb1452	Positive	275.1	258.1	5.98	274.1	[M+H]+	50	30	-	N-Lauryldiethanolamine	Others	0.136715	1290000	971000	1340000	1260000	909000	1720000	1050000	576000	786000	280000	1370000	1310000	1990000	398000	1960000	2240000	1320000	322000	1070000	1250000	1040000	1330000	--
CdM653	pmb0142	Positive	165.1	95.5	5.99	164.1	[M+H]+	50	30	C10945	Caffeic aldehyde	Hydroxycinnamoyl derivatives	0.108401	91800	79600	80200	70500	44700	25700	55800	77800	169000	23900	34100	68600	29800	56200	137000	50600	33800	30900	24700	43900	63700	31600	ko00940,ko01110
CdM658	pme0144	Positive	190.1	130.1	6.13	189.079	[M+H]+	50	30	-	Methyl indole-3-acetate	Phytohormones	0.0301592	989000	1000000	978000	933000	595000	241000	621000	1150000	492000	166000	1110000	1100000	265000	529000	601000	1220000	806000	58400	575000	3830000	1520000	3680000	--
CdM661	pme2344	Positive	231.152	149.1	6.16	230.152	[M+H]+	50	30	-	Dodecanedioic aicd	Organic acids	0.049656	63900	64900	57900	62400	21000	36700	17500	34500	21400	33200	22000	39700	23200	92700	37900	131000	58300	210000	29600	182000	189000	105000	--
CdM670	pme3290	Positive	331	316	6.44	330.074	[M+H]+	50	30	C01265	3,7-Di-O-methylquercetin	Flavonol	0.135184	12300	16300	16600	14200	34300	33000	31700	9	9	9	42200	43500	44700	9	9	9	9	9	9	9	9	9
CdM675	pmb2211	Positive	343.1	240.9	6.53	342.1	[M+H]+	50	30	-	Cocamidopropyl betaine	Others	0.0217258	5910000	6100000	6230000	6110000	5290000	5750000	6340000	5830000	6310000	5370000	6300000	5790000	6140000	7780000	6260000	6780000	5460000	6320000	5990000	6710000	5440000	6770000	--
CdM678	pmb0149	Positive	351	259.8	6.62	350	[M+H]+	50	30	-	MAG (18:4) isomer1	Lipids_Glycerolipids	0.0519386	420000	427000	379000	413000	925000	80300	390000	9	9	9	726000	532000	338000	506000	929000	83000	9	9	9	9	9	9	--
CdM680	pmb0885	Positive	291	273.9	6.65	290	[M+H]+	50	30	-	4-oxo-9Z,11Z,13E,15E-octadecatetraenoic acid	Lipids_Fatty acids	0.0480061	19800	21800	20300	21700	16600	16100	18300	36200	22300	35500	20400	42700	24600	22000	37100	30600	9	9	9	7020	22100	15300	--
CdM683	pmb0862	Positive	440.1	422.7	6.71	439.1	[M+H]+	50	30	-	LysoPC 12:1	Lipids_Glycerophospholipids	0.107165	14100	15000	17500	17400	31400	16400	42000	11900	29200	6560	13600	9310	8380	5350	25300	36600	5550	2750	24700	11900	4210	6640	--	--
CdM693	pme1662	Positive	287.084	287.1	6.92	286.084	[M+H]+	50	30	C09833	sakuranetin	Flavone	0.232477	14700	12900	11800	8150	75500	45300	15000	4870	6110	3630	29500	19000	8590	7360	13500	9460	11900	7000	55900	13000	3970	16100	--
CdM697	pme1518	Positive	403.132	373.1	7.02	402.132	[M+H]+	50	30	C10112	Nobiletin	Flavone	0.0732345	4290000	3860000	3610000	3820000	4020000	3640000	3870000	3660000	4190000	2880000	3220000	2920000	4290000	3670000	3680000	2840000	2940000	3390000	4010000	4610000	3770000	4490000	--	--
CdM702	pmb1530	Positive	317.1	299.9	7.28	316.1	[M+H]+	50	30	-	Phytocassane D	Terpenoids	0.0200467	67500	67200	64800	65400	50900	54700	85800	109000	61000	54100	103000	85000	89700	59700	111000	89600	24800	3580	52700	27200	47800	70600	--	--
CdM704	pmb0863	Positive	492.3	184.5	7.29	491.3	[M+H]+	50	30	-	LysoPC 16:2 (2n isomer)	Lipids_Glycerophospholipids	0.027195	644000	624000	613000	605000	299000	53400	1540000	73100	2310000	101000	365000	146000	207000	61900	656000	2940000	139000	65800	206000	513000	222000	383000	--	--
CdM706	pme3255	Positive	179	138	7.3	178.099	[M+H]+	50	30	C10454	Methyleugenol	Hydroxycinnamoyl derivatives	0.0726417	73400	63600	74400	74000	58600	75700	50100	61300	45200	50100	33400	60000	72600	63700	82500	66800	93800	87500	92200	77700	73600	63200	C10454	ko00940
CdM707	pme3066	Positive	317.2	271.2	7.33	316.168	[M+H]+	50	30	C11863	GIBBERELLIN A9	Phytohormones	0.105593	95600	87300	81200	74600	153000	282000	24800	9	9	9	127000	82300	37600	315000	479000	151000	97900	112000	127000	9	9	9	ko00904,ko01100,ko01110
CdM709	pmd0130	Positive	468.3	450.5	7.5	467.3	[M+H]+	50	30	-	LysoPC 14:0 (2n isomer)	Lipids_Glycerophospholipids	0.0323477	540000	521000	529000	500000	645000	122000	1320000	107000	2450000	70600	565000	66400	385000	62500	876000	600000	52700	31300	281000	198000	123000	116000	--	--
CdM710	pme1550	Positive	373.121	373.1	7.5	372.121	[M+H]+	50	30	C10190	Tangeretin	Flavone	0.0850105	3860000	3360000	3160000	3490000	3760000	3320000	3410000	3080000	3220000	2570000	2660000	2760000	3760000	3310000	3130000	2460000	2690000	3180000	3650000	3920000	3520000	3800000	--
CdM711	pmb0159	Positive	696.4	696.2	7.53	695.4	[M+H]+	50	30	-	DGMG (18:2) isomer2	Lipids_Glycerolipids	0.0830263	78700	64600	70800	74600	32300	10400	144000	8200	134000	2820	63500	19300	57400	21300	120000	240000	9190	6580	11800	60000	101000	93200	--
CdM712	pmb0160	Positive	353.3	261.8	7.53	352.3	[M+H]+	50	30	-	MAG (18:3) isomer5	Lipids_Glycerolipids	0.0696571	1640000	1430000	1430000	1440000	617000	220000	2780000	183000	2790000	55800	1310000	425000	1190000	337000	2870000	5420000	204000	109000	277000	1200000	2150000	1890000	--
CdM713	pmb2251	Positive	694.1	335.8	7.53	693.1	[M+H]+	50	30	-	DGMG (18:1)	Lipids_Glycerolipids	0.100416	612000	606000	605000	736000	303000	96200	1530000	82900	1530000	28400	684000	194000	558000	186000	1130000	2330000	96500	48800	115000	587000	893000	966000	--
CdM714	pme3459	Positive	317.2	281.3	7.53	316.204	[M+H]+	50	30	C09066	Cafestol	Hydroxycinnamoyl derivatives	0.218102	193000	266000	334000	263000	549000	882000	215000	53100	81800	308000	1200000	36400	277000	53800	2930000	691000	442000	10400	406000	39900	40800	340000	--	--
CdM715	pmb0292	Positive	387.1	331.8	7.59	386.1	[M+H]+	50	30	C00187	Cholesterol	Others	0.0488875	5970000	5340000	5550000	5800000	8490000	8350000	6340000	4520000	5400000	3760000	4730000	5430000	8270000	3430000	7200000	7560000	4690000	2660000	4010000	4650000	7960000	7460000	ko00100,ko00120,ko00140,ko00981,ko00984,ko01066,ko01100,ko01120,ko04913,ko04925,ko04975,ko04976,ko04977,ko05200,ko05217
CdM716	pmb0864	Positive	426.3	285.8	7.63	425.3	[M+H]+	50	30	-	LysoPE 14:0	Lipids_Glycerophospholipids	0.0716317	991000	856000	879000	858000	2360000	1030000	5500000	756000	2210000	86300	1890000	1050000	1360000	389000	1840000	1220000	488000	215000	1440000	962000	580000	702000	--	--
CdM718	pmb2260	Positive	480.1	184.5	7.66	479.1	[M+H]+	50	30	-	LysoPC 15:1	Lipids_Glycerophospholipids	0.091299	53000	43600	53200	48600	75500	51100	75500	62100	59600	14200	25700	39100	31000	27200	43000	97300	26700	12000	54700	72200	79000	54500	--	--
CdM719	pmb0865	Positive	518.2	500.3	7.67	517.2	[M+H]+	50	30	-	LysoPC 18:3 (2n isomer)	Lipids_Glycerophospholipids	0.0771656	64300000	55900000	55400000	55000000	16800000	5070000	85100000	10400000	164000000	4470000	34300000	17000000	24200000	14000000	34400000	273000000	9700000	6120000	13800000	68500000	23300000	29200000	--	--
CdM720	pmb0866	Positive	468.1	450.5	7.68	467.1	[M+H]+	50	30	-	LysoPC 14:0	Lipids_Glycerophospholipids	0.0131918	4200000	4120000	4140000	4240000	11300000	2880000	16600000	2350000	10400000	617000	5530000	1090000	5180000	909000	8700000	4020000	1220000	587000	6440000	2010000	2120000	1950000	--	--
CdM722	pmb0848	Positive	494.3	184.6	7.82	493.3	[M+H]+	50	30	-	LysoPC 16:1 (2n isomer)	Lipids_Glycerophospholipids	0.042891	4570000	4250000	4630000	4300000	685000	259000	3840000	1240000	6280000	422000	2080000	1590000	844000	837000	1390000	37000000	1750000	862000	438000	8800000	4060000	7010000	--	--
CdM724	pmb0161	Positive	696.4	337.8	8.05	695.4	[M+H]+	50	30	-	DGMG (18:2) isomer1	Lipids_Glycerolipids	0.0717062	2100000	1810000	2010000	2130000	1260000	784000	2950000	384000	2900000	137000	3620000	1480000	1410000	745000	1910000	2940000	912000	442000	471000	3700000	5810000	5820000	--
CdM726	pme2816	Positive	301.2	133.1	8.15	300.209	[M+H]+	50	30	C16683	4-Oxoretinol	Vitamins	0.0480275	256000	232000	245000	232000	389000	643000	134000	9	9	9	697000	374000	50700	700000	915000	485000	431000	364000	296000	9	9	9	C16683	ko00830
CdM728	pmb0873	Positive	520	125	8.19	519	[M+H]+	50	30	-	LysoPC 18:2 (2n isomer)	Lipids_Glycerophospholipids	0.0453266	144000000	136000000	135000000	129000000	72200000	11800000	218000000	14400000	353000000	10500000	144000000	30300000	77800000	18900000	128000000	261000000	22900000	13700000	38700000	124000000	79800000	110000000	--	--
CdM729	pmb2319	Positive	482.3	184.5	8.2	481.3	[M+H]+	50	30	-	LysoPC 15:0	Lipids_Glycerophospholipids	0.0546939	1670000	1520000	1560000	1470000	1970000	1670000	8890000	1810000	4370000	209000	2410000	1210000	1520000	538000	1510000	5630000	886000	312000	563000	2640000	1340000	2100000	--	--
CdM730	pmb0163	Positive	696.4	696.3	8.24	695.4	[M+H]+	50	30	-	DGMG (18:2) isomer3	Lipids_Glycerolipids	0.0790654	712000	628000	652000	746000	963000	1170000	958000	215000	875000	53200	1490000	610000	637000	478000	926000	361000	211000	106000	243000	1490000	2390000	1630000	--
CdM731	pme1399	Positive	355.15	178.9	8.24	354.147	[M+H]+	50	30	C16417	Xanthohumol	Flavanone	0.102267	7720	6380	6250	7260	9	9	9	9	9	9	9	9	9	11300	5440	17200	9	9	9	2970	4680	7420
CdM732	pmb0874	Positive	478.6	337.9	8.32	477.6	[M+H]+	50	30	-	LysoPE 18:2 (2n isomer)	Lipids_Glycerophospholipids	0.058461	16600000	16900000	17600000	18900000	17500000	7390000	52700000	5990000	57600000	2190000	25700000	12000000	16400000	6370000	32900000	13800000	11700000	8900000	7550000	14500000	13800000	10500000	--	--
CdM733	pmb1587	Positive	207.2	165.5	8.33	206.2	[M+H]+	50	30	-	4-Hydroxy-3,5-diisopropylbenzaldehyde	Benzoic acid derivatives	0.0628448	206000	180000	185000	183000	9	9	9	9	9	9	9	9	9	2930000	1480000	21800	23600	38600	31100	9	9	9	--
CdM734	pmb2325	Positive	353.1	261.8	8.33	352.1	[M+H]+	50	30	-	MAG (18:3) isomer2	Lipids_Glycerolipids	0.110769	1400000	1290000	1330000	1640000	575000	216000	4540000	106000	4710000	39700	1570000	539000	406000	187000	1090000	3640000	214000	54700	204000	684000	928000	1260000	--
CdM735	pmb0852	Positive	520.3	502.3	8.36	519.3	[M+H]+	50	30	-	LysoPC 18:2	Lipids_Glycerophospholipids	0.042939	123000000	116000000	115000000	111000000	130000000	34600000	274000000	32900000	283000000	13600000	158000000	27500000	124000000	25500000	181000000	79900000	35400000	24600000	85600000	58100000	73600000	63800000	--	--
CdM736	pmb0164	Positive	355.1	263.8	8.38	354.1	[M+H]+	50	30	-	MAG (18:2) isomer1	Lipids_Glycerolipids	0.122028	254000	196000	200000	217000	223000	292000	293000	52200	264000	17100	445000	130000	220000	101000	368000	101000	54900	26300	81300	344000	651000	397000	--
CdM737	pma0461	Positive	277.216	157.4	8.47	276.216	[M+H]+	50	30	-	14,15-Dehydrocrepenynic acid	Lipids_Fatty acids	0.195892	715000	494000	486000	520000	391000	251000	676000	161000	796000	84200	840000	383000	533000	482000	871000	716000	275000	153000	228000	360000	332000	342000
CdM738	pmb0165	Positive	494.3	476.6	8.48	493.3	[M+H]+	50	30	-	LysoPC 16:1	Lipids_Glycerophospholipids	0.0699393	386000	349000	358000	326000	1020000	145000	897000	128000	685000	407000	604000	44200	1050000	213000	1060000	208000	76900	26600	239000	222000	152000	214000	--	--
CdM740	pmb1605	Positive	353.3	335.8	8.55	352.3	[M+H]+	50	30	-	MAG (18:3) isomer3	Lipids_Glycerolipids	0.0792706	2420000	2070000	2220000	2460000	3780000	1900000	5000000	467000	5040000	98400	1660000	565000	1670000	477000	4560000	4710000	204000	104000	1400000	2490000	3550000	3410000	--
CdM741	pmd0132	Positive	496.33	478.3	8.57	495.33	[M+H]+	50	30	-	LysoPC 16:0 (2n isomer)	Lipids_Glycerophospholipids	0.0388317	14000000	13800000	13500000	12800000	14300000	4020000	88000000	3940000	110000000	973000	56200000	3540000	12900000	2500000	26500000	13400000	2080000	772000	1950000	7100000	3130000	7480000	--	--
CdM742	pmb0876	Positive	454.2	314	8.68	453.2	[M+H]+	50	30	-	LysoPE 16:0	Lipids_Glycerophospholipids	0.110163	75700000	63300000	62900000	59200000	62000000	70600000	448000000	67400000	359000000	3420000	229000000	161000000	126000000	52700000	140000000	89700000	61800000	11100000	14600000	152000000	25300000	121000000	--	--
CdM743	pmb2363	Positive	357.2	339.9	8.69	356.2	[M+H]+	50	30	-	MAG (18:1) isomer1	Lipids_Glycerolipids	0.0857293	1440000	1230000	1380000	1510000	213000	171000	783000	417000	633000	49000	1130000	1060000	907000	783000	563000	3850000	717000	394000	128000	4630000	4920000	4450000	--
CdM744	pmb2369	Positive	772.1	478.4	8.73	771.1	[M+H]+	50	30	-	PC 19:2/16:0	Lipids_Glycerophospholipids	0.403602	13200	12100	19300	28100	20800	7820	319000	5910	289000	147000	111000	6590	26000	62800	62700	62800	9	9	9	43700	8670	61300	--	--
CdM745	pmb0854	Positive	518.3	459.6	8.74	517.3	[M+H]+	50	30	-	LysoPC 18:3	Lipids_Glycerophospholipids	0.0331193	53100000	49100000	51000000	52000000	63200000	34100000	321000000	34400000	273000000	3390000	152000000	41700000	68100000	17100000	95700000	87300000	29500000	8610000	14200000	69900000	28300000	89200000	--	--
CdM746	pmb0855	Positive	496.3	478.3	8.74	495.3	[M+H]+	50	30	-	LysoPC 16:0	Lipids_Glycerophospholipids	0.0884119	270000000	240000000	235000000	219000000	265000000	156000000	670000000	155000000	602000000	18000000	485000000	218000000	293000000	92800000	359000000	330000000	149000000	44300000	73200000	278000000	139000000	335000000	--	--
CdM747	pmb0296	Positive	357.2	339.9	8.8	356.2	[M+H]+	50	30	-	MAG (18:1) isomer2	Lipids_Glycerolipids	0.0798504	1360000	1200000	1350000	1460000	202000	151000	766000	407000	533000	41300	1070000	1070000	888000	820000	520000	3860000	651000	355000	130000	4560000	4980000	4500000	--
CdM748	pmb0856	Positive	480.5	339.9	8.8	479.5	[M+H]+	50	30	-	LysoPE 18:1 (2n isomer)	Lipids_Glycerophospholipids	0.0460546	31400000	28900000	28900000	28400000	3880000	2500000	75800000	11800000	85600000	1730000	21300000	18200000	18800000	7330000	17200000	79200000	8410000	5700000	2580000	68200000	25700000	43600000	--	--
CdM749	pmb0877	Positive	480.1	339.9	8.8	479.1	[M+H]+	50	30	-	LysoPE 18:1	Lipids_Glycerophospholipids	0.0380378	1110000	1060000	1090000	1160000	148000	87800	3200000	434000	3650000	67800	873000	695000	763000	285000	629000	3370000	329000	209000	95900	2860000	996000	1800000	--	--
CdM750	pmb2388	Positive	524.1	507.4	8.84	523.1	[M+H]+	50	30	-	LysoPC 18:0 (2n isomer)	Lipids_Glycerophospholipids	0.0457127	4310000	4100000	4030000	3860000	545000	117000	5770000	759000	7900000	118000	2220000	1520000	1680000	815000	2020000	23900000	863000	580000	314000	9850000	3980000	11500000	--	--
CdM751	pmb0859	Positive	522.4	184.5	8.86	521.4	[M+H]+	50	30	-	LysoPC 18:1 (2n isomer)	Lipids_Glycerophospholipids	0.062137	244000000	225000000	223000000	210000000	32500000	7390000	276000000	52600000	341000000	9000000	134000000	101000000	104000000	55100000	127000000	487000000	57100000	39600000	22400000	367000000	227000000	390000000	--	--
CdM752	pmc0960	Positive	544.4	544.4	8.89	543.4	[M+H]+	50	30	-	LysoPC 20:4	Lipids_Glycerophospholipids	0.0581284	15500000	14200000	16000000	16200000	2230000	499000	20700000	3520000	28300000	507000	7100000	5380000	5520000	3020000	7900000	78900000	3320000	2440000	1410000	41800000	17900000	45100000	--	--
CdM753	pmb0889	Positive	279.3	201.5	8.91	278.3	[M+H]+	50	30	C08364	Punicic acid	Lipids_Fatty acids	0.0831482	4340000	3660000	4000000	3660000	4000000	1600000	5390000	1380000	7040000	452000	10300000	3260000	4440000	3510000	5950000	5880000	2140000	1380000	2060000	3500000	2140000	2610000
CdM754	pmb0880	Positive	482.1	314	8.92	481.1	[M+H]+	50	30	-	LysoPE 18:0 (2n isomer)	Lipids_Glycerophospholipids	0.104527	15100	11700	13700	13200	9	9	9	9	9	9	160000	7510	21100	39400	42800	36000	9	9	9	9	9	9	--	--
CdM756	pmb2383	Positive	534.1	338	8.99	533.1	[M+H]+	50	30	-	MGMG (18:2) isomer2	Lipids_Glycerolipids	0.189498	1120000	779000	909000	1190000	756000	413000	3180000	200000	3880000	58600	2190000	570000	498000	215000	901000	1530000	190000	104000	216000	1150000	1040000	1460000	--
CdM757	pmb0882	Positive	522.1	125.5	9.04	521.1	[M+H]+	50	30	-	LysoPC 18:1	Lipids_Glycerophospholipids	0.0261121	26300000	25700000	25100000	24800000	11000000	4220000	77200000	16100000	41400000	1950000	26100000	15500000	28300000	11200000	26100000	61300000	16800000	10600000	7120000	33700000	40000000	61700000	--	--
CdM758	pmb1626	Positive	534.4	262.9	9.15	533.4	[M+H]+	50	30	-	MGMG (18:2) isomer1	Lipids_Glycerolipids	0.204999	1460000	993000	1190000	1590000	2280000	1530000	2380000	303000	3450000	53200	2080000	848000	887000	511000	1680000	1220000	246000	97300	428000	3050000	3380000	2380000	--
CdM759	pma3606	Positive	295.2	179.5	9.18	294.2	[M+H]+	50	30	-	9-Hydroxy-(10E,12Z,15Z)-octadecatrienoic acid	Lipids_Fatty acids	0.0955788	1560000	1250000	1350000	1460000	1340000	437000	1550000	590000	2490000	189000	2060000	1190000	1890000	1540000	1090000	3480000	732000	668000	668000	1300000	1130000	1060000	--
CdM761	pmb2406	Positive	510.1	510.4	9.29	509.1	[M+H]+	50	30	-	LysoPC 17:0	Lipids_Glycerophospholipids	0.110608	2630000	2210000	2120000	2090000	1210000	1750000	28700000	2450000	25900000	109000	7660000	6690000	2330000	1390000	2620000	10800000	4880000	1430000	197000	16500000	1370000	20900000	--	--
CdM762	pmb1650	Positive	279.2	149.4	9.64	278.2	[M+H]+	50	30	-	Octadeca-11E,13E,15Z-trienoic acid	Lipids_Fatty acids	0.0885538	282000000	234000000	238000000	263000000	228000000	190000000	278000000	191000000	236000000	180000000	274000000	240000000	301000000	191000000	309000000	280000000	167000000	322000000	273000000	273000000	270000000	303000000
CdM763	pmb1652	Positive	149	121.3	9.64	148	[M+H]+	50	30	-	Phthalic anhydride	Others	0.0996932	34900000	28100000	28800000	30800000	23900000	19500000	29600000	19700000	23900000	18900000	31500000	27100000	39000000	19600000	42000000	33800000	17800000	42600000	35900000	32800000	33300000	37900000	--	--
CdM764	pmd0136	Positive	524.36	507.4	9.69	523.36	[M+H]+	50	30	-	LysoPC 18:0	Lipids_Glycerophospholipids	0.105545	48900000	40500000	43200000	38500000	18400000	19000000	359000000	24500000	387000000	1680000	228000000	65600000	62300000	11600000	116000000	38400000	94500000	11700000	2200000	52200000	6630000	113000000	--	--
CdM765	pmb0883	Positive	482.1	341.9	9.8	481.1	[M+H]+	50	30	-	LysoPE 18:0	Lipids_Glycerophospholipids	0.217214	523000	341000	336000	436000	235000	282000	10400000	257000	6680000	24200	1920000	1270000	498000	189000	940000	351000	960000	193000	37800	809000	73900	874000	--	--
CdM766	pmd0144	Positive	550.37	245.1	9.81	549.37	[M+H]+	50	30	-	LysoPC 20:1 (2n isomer)	Lipids_Glycerophospholipids	0.0808072	496000	467000	557000	543000	339000	19700	1880000	20600	2690000	17300	1890000	60300	180000	28600	394000	894000	28800	12100	39400	189000	109000	109000	--	--
CdM767	pmb1656	Positive	353.1	173.7	9.85	352.1	[M+H]+	50	30	-	MAG (18:3) isomer4	Lipids_Glycerolipids	0.210347	233000	168000	142000	187000	79000	34800	241000	23200	183000	103000	144000	268000	74400	153000	218000	835000	25700	10800	90100	158000	116000	300000	--
CdM768	pmd0145	Positive	550.37	245.1	9.9	549.37	[M+H]+	50	30	-	LysoPC 20:1	Lipids_Glycerophospholipids	0.0549042	2370000	2180000	2420000	2480000	2640000	262000	22700000	445000	13100000	95800	6160000	1080000	1560000	397000	1820000	4540000	872000	330000	442000	1820000	1550000	1530000	--	--
CdM769	pmb2444	Positive	353.2	261.8	10	352.2	[M+H]+	50	30	-	MAG (18:3) isomer1	Lipids_Glycerolipids	0.230374	11500000	7920000	6780000	9690000	5150000	2540000	16700000	1510000	15000000	108000	8510000	7710000	3950000	6150000	17600000	32800000	2100000	581000	3960000	10100000	10700000	14200000	--
CdM770	pme3069	Positive	556.28	371.2	10.22	555.284	[M+H]+	50	30	C05122	Taurocholic acid	Organic acids	0.0738818	27900000	24400000	23700000	26200000	28500000	26600000	28000000	24400000	28100000	25000000	26200000	25600000	25600000	25500000	25700000	24900000	24400000	24800000	23600000	24600000	25300000	25500000	C05122	ko00120,ko00121,ko00430,ko01100,ko04976
CdM771	pmb0890	Positive	355.1	337.9	10.45	354.1	[M+H]+	50	30	-	MAG (18:2)	Lipids_Glycerolipids	0.151153	14600000	10500000	11100000	12900000	8710000	2820000	26800000	1390000	22400000	154000	19200000	13400000	6110000	6100000	21900000	24100000	1820000	748000	6000000	10600000	11100000	25600000	--
CdM772	pmb2467	Positive	279.2	201.5	10.56	278.2	[M+H]+	50	30	C06427	α-Linolenic acid	Lipids_Fatty acids	0.180295	1030000	696000	759000	933000	700000	197000	1860000	139000	2030000	30800	928000	276000	594000	431000	1470000	2150000	241000	87100	335000	688000	924000	933000
CdM773	pme1014	Positive	445.3	281	10.71	444.303	[M+H]+	50	30	C00828	Menaquinone (K2)	Vitamins	0.177287	642000	434000	466000	525000	811000	639000	494000	384000	448000	506000	510000	739000	599000	368000	457000	743000	364000	458000	750000	269000	1050000	362000	C00828	ko00130,ko01100,ko01110,ko02020,ko04977
CdM776	pme1640	Positive	371.1	267.1	11.63	370.105	[M+H]+	50	30	-	sesamolin	Others	0.288651	1140000	557000	780000	932000	1290000	1360000	1270000	579000	695000	627000	665000	1220000	911000	688000	853000	1440000	745000	707000	1070000	669000	1520000	577000	--	--
CdM777	mws1155	Positive	183.2	147	0.74	182.079	[M+H]+	50	30	C00392	Mannitol	Alcohols and polyols	0.0845184	163000	184000	166000	150000	351000	71200	339000	106000	205000	57500	151000	80300	273000	183000	130000	53900	99300	11500	246000	62800	210000	63900	ko00051,ko02010,ko02060
CdM781	pme0180	Negative	168.1	151.1	0.68	169.085	[M-H]-	-50	-30	C01152	1-Methylhistidine	Amino acid derivatives	0.147471	32500	24200	29100	24200	32200	48400	64500	9	9	9	48700	39300	29900	9	9	9	320000	176000	31000	9	9	9	ko00340
CdM783	pme3007	Negative	403	159	0.68	404.161	[M-H]-	-50	-30	C00015	Uridine 5’-diphosphate	Nucleotide and its derivates	0.0955273	240000	248000	265000	210000	414000	68000	461000	169000	558000	131000	193000	139000	661000	281000	568000	51800	108000	85500	176000	123000	67000	240000	ko00240,ko00908,ko01100,ko04080
CdM784	pmb2657	Negative	289.1	191.2	0.69	290.1	[M-H]-	-50	-30	C03406	Argininosuccinate	Organic acids	0.0848835	137000	168000	157000	150000	91500	198000	177000	89600	228000	189000	144000	44700	319000	175000	381000	48000	78600	57700	292000	40200	78900	74000	C03406	ko00220,ko00250,ko01100,ko01110,ko01130,ko01230
CdM785	pmb3088	Negative	421.1	241.2	0.69	422.1	[M-H]-	-50	-30	C00689	Trehalose 6-phosphate	Carbohydrates	0.111537	182000	141000	158000	150000	159000	83700	81500	102000	81300	128000	69300	68300	96700	69900	91200	73700	108000	109000	75600	108000	191000	75100	C00689	ko00500,ko01100,ko02060,ko04723
CdM786	pme0066	Negative	116.1	73.9	0.69	117.054	[M-H]-	-50	-30	C00581	Guanidineacetic acid	Amino acid derivatives	0.333404	8100	5250	4240	8810	13700	898	9330	9140	10500	2460	5520	10900	8770	8930	19100	12300	9810	2240	18000	9800	1110	1740	ko00260,ko00330,ko01100
CdM787	pme3160	Negative	259	96.9	0.69	260.03	[M-H]-	-50	-30	C00092	D-Glucose 6-phosphate	Carbohydrates	0.0604264	4860000	5310000	4840000	4600000	3520000	3270000	6310000	3550000	3910000	3710000	5520000	1910000	9720000	6870000	9860000	2730000	6350000	1170000	21400000	1480000	1880000	1290000	C00092	ko00500,ko00521,ko00524,ko00562,ko01062,ko01100,ko01130,ko02020,ko02060,ko04911,ko04917,ko04918,ko04931,ko04973,ko05111,ko05230
CdM788	pme3207	Negative	141.03	58.7	0.69	142.027	[M-H]-	-50	-30	-	trans,trans-Muconic acid	Organic acids	0.181709	16900000	10800000	14800000	15700000	4830000	79800000	838000	48000000	602000	46500000	1040000	13700000	1010000	11900000	1670000	7090000	3010000	6800000	625000	20400000	11700000	23700000	--
CdM789	pmb2497	Negative	197	135.1	0.7	198	[M-H]-	-50	-30	C05584	4-Hydroxy-3-methoxymandelate	Organic acids	0.0908949	85000	73400	71800	84900	182000	26100	72000	117000	116000	32700	143000	61500	133000	143000	93000	87000	87300	65600	106000	126000	137000	68600	C05584	ko00350,ko01100
CdM791	pme0534	Negative	195.157	75.1	0.7	196.058	[M-H]-	-50	-30	C00257	Gluconic acid	Carbohydrates	0.0476845	2060000	1920000	1910000	1840000	1730000	1220000	1380000	1870000	1520000	935000	1900000	2630000	1940000	2970000	1390000	2770000	1880000	1050000	1370000	2030000	1610000	1320000	C00257	ko00030,ko01100,ko01110,ko01120,ko01130,ko01200
CdM792	pmb2648	Negative	263.1	147.2	0.71	264.1	[M-H]-	-50	-30	C00378	Thiamine	Vitamins	0.216957	11300	7290	7370	8560	15400	15100	14800	7620	13800	10700	26000	3960	10900	30500	12800	12800	3900	9020	15600	8990	2920	2760	ko00730,ko01100,ko02010,ko04122,ko04977
CdM793	pme0011	Negative	132	99.9	0.71	133.037	[M-H]-	-50	-30	C00049	L-Aspartic acid	Amino acids	0.0361132	4190000	3970000	4000000	3840000	1180000	381000	7770000	1710000	9950000	3040000	5890000	1550000	10200000	1210000	10800000	2090000	6460000	2190000	6840000	1070000	3420000	281000	ko00220,ko00250,ko00260,ko00261,ko00270,ko00300,ko00340,ko00410,ko00460,ko00710,ko00760,ko00770,ko00970,ko01060,ko01064,ko01070,ko01100,ko01110,ko01120,ko01130,ko01200,ko01210,ko01230,ko02010,ko02020,ko02030,ko04080,ko04974,ko05230
CdM795	pme1712	Negative	275	257.1	0.71	276.132	[M-H]-	-50	-30	C00449	L-Saccharopine	Amino acid derivatives	0.105566	221000	220000	201000	175000	81100	147000	164000	273000	284000	98600	164000	255000	108000	113000	168000	400000	306000	80600	188000	267000	57700	79600	C00449	ko00300,ko00310,ko01100,ko01110,ko01130,ko01230
CdM797	pme2830	Negative	140	78.5	0.71	141.019	[M-H]-	-50	-30	-	O-Phosphorylethanolamine	Others	0.0835384	22200	25900	22600	21600	20000	6860	33900	6900	40900	7780	23400	29900	36300	19500	37800	11400	49300	20800	77700	19400	13100	4590	C00346	ko00564,ko00600,ko01100,ko01503,ko04071
CdM798	pmb2857	Negative	308.1	128.2	0.72	309.1	[M-H]-	-50	-30	-	L-Glutamic acid O-glucoside	Amino acid derivatives	0.119639	27300	29700	29300	22600	11100	2300	20800	33100	16200	13400	58200	63500	24900	24600	75800	84900	46100	10600	27400	14700	14200	11700	--
CdM799	pme0007	Negative	174.1	131.1	0.72	175.096	[M-H]-	-50	-30	C00327	L-Citrulline	Amino acids	0.203654	48400	47700	39000	30500	273000	177000	81100	9	9	9	60400	30600	53800	44200	77600	10800	24700	57200	89600	33200	10500	21900
CdM800	pme0009	Negative	104	73.9	0.72	105.043	[M-H]-	-50	-30	C00065	L-Serine	Amino acids	0.0438445	400000	379000	365000	365000	475000	159000	503000	281000	433000	150000	974000	219000	818000	192000	890000	283000	311000	53200	1220000	151000	126000	19800
CdM801	pme0013	Negative	146.1	102.1	0.72	147.053	[M-H]-	-50	-30	C00025	L-Glutamic acid	Amino acids	0.123573	2050000	1670000	1570000	1650000	1740000	302000	3080000	936000	5840000	1300000	4110000	863000	3760000	959000	7440000	503000	2460000	697000	2250000	641000	1340000	130000
CdM802	pme3705	Negative	193.141	72.9	0.72	194.043	[M-H]-	-50	-30	C00191	D-glucoronic acid	Carbohydrates	0.0266667	1170000	1110000	1110000	1110000	623000	302000	1290000	663000	1540000	251000	924000	1450000	465000	648000	964000	1140000	1770000	633000	771000	1360000	603000	1040000	ko00040,ko00053,ko00520,ko00562,ko01100
CdM803	pma6281	Negative	145.06	74	0.73	146.06	[M-H]-	-50	-30	-	Methylglutaric acid	Organic acids	0.115677	46100	44600	41300	35200	64300	3100	96600	5620	117000	29200	40100	3910	92500	4710	80400	2370	45200	36700	28200	2670	25000	13800	--
CdM804	pmb2855	Negative	307	145.2	0.73	308	[M-H]-	-50	-30	-	L-Glutamine O-hexside	Amino acid derivatives	0.155208	57000	62200	48800	70900	65800	82500	99200	29300	89800	83900	207000	83100	144000	21900	615000	116000	83800	30700	99200	33500	69600	14700	--
CdM805	pme0226	Negative	131.054	71.8	0.73	132.054	[M-H]-	-50	-30	C00152	L-Asparagine	Amino acids	0.0414995	2910000	2770000	2750000	2630000	6020000	232000	10700000	242000	7860000	1540000	5200000	95800	5610000	94600	9170000	184000	5040000	596000	3020000	57400	896000	13000	ko00250,ko00460,ko00970,ko01060,ko01100,ko01110,ko01230,ko04974,ko04978,ko05230
CdM806	pme1730	Negative	117	99.8	0.73	118.027	[M-H]-	-50	-30	-	D-Erythronolactone	Organic acids	0.0222394	597000	569000	576000	591000	92700	1490000	40300	785000	39100	1330000	62200	740000	39500	132000	45100	598000	222000	1060000	51300	855000	802000	1400000	--
CdM808	pme2256	Negative	151.146	70.8	0.73	152.069	[M-H]-	-50	-30	C01904	D-Arabitol	Alcohols and polyols	0.138692	31600	30300	23000	31000	26300	17200	42400	13600	55200	11100	54500	25600	33900	15800	39800	37400	30500	25000	30100	24200	41900	67700	ko00040,ko01100
CdM809	pmb2653	Negative	649.1	503.3	0.74	650.1	[M-H]-	-50	-30	-	D(+)-Melezitose O-rhamnoside	Carbohydrates	0.200952	224000	308000	198000	224000	8130	508000	21400	64800	6050	59500	37000	96300	43800	719000	113000	54700	17700	105000	65200	414000	22800	138000	--	--
CdM810	pmb2654	Negative	460.1	118.2	0.74	461.1	[M-H]-	-50	-30	-	Anthranilate O-hexosyl-O-hexoside	Benzoic acid derivatives	0.155538	133000	106000	145000	108000	31700	153000	100000	58100	97500	81500	155000	33900	120000	183000	199000	20200	108000	241000	69600	626000	43500	66400	--	--
CdM811	pme0022	Negative	118	100.9	0.74	119.058	[M-H]-	-50	-30	C00188	L-Threonine	Amino acids	0.0917914	1120000	973000	920000	939000	1050000	607000	763000	892000	859000	882000	1360000	553000	1060000	334000	2050000	1200000	2160000	398000	1320000	1020000	410000	135000
CdM812	pme0161	Negative	118.1	101	0.74	119.058	[M-H]-	-50	-30	C00263	L-Homoserine	Amino acids	0.0983442	10700	13300	13200	12100	13000	7230	12200	12900	12400	8510	21800	3180	23900	4630	34000	11800	21400	5760	20800	12600	13000	4750
CdM814	pme0499	Negative	181	70.9	0.74	182.079	[M-H]-	-50	-30	C00794	D-Sorbitol	Alcohols and polyols	0.0325091	40500000	39000000	37400000	38900000	59500000	38700000	38000000	40000000	32500000	33500000	42900000	32800000	57200000	52200000	30900000	35900000	48400000	16400000	63600000	17900000	47700000	19300000	C00794	ko00051,ko00052,ko01100,ko02010,ko02060
CdM815	pme0516	Negative	179.157	87	0.74	180.063	[M-H]-	-50	-30	C00137	Inositol	Others	0.0436781	4270000	4420000	4010000	4390000	5060000	2120000	4940000	3780000	5810000	2950000	6650000	1940000	5080000	6110000	6660000	3500000	1710000	923000	6130000	5270000	3060000	2980000	C00137	ko00052,ko00053,ko00521,ko00562,ko01100,ko01120,ko01130,ko02010,ko04070
CdM820	pme2237	Negative	181.08	70.8	0.75	182.079	[M-H]-	-50	-30	C01697	Dulcitol	Alcohols and polyols	0.0410038	59500000	55700000	54000000	57000000	84100000	56400000	57100000	57300000	50400000	48100000	63600000	47900000	79600000	75900000	44400000	51000000	70200000	24000000	92400000	26300000	67400000	28000000	ko00052,ko01100,ko02060
CdM824	pme1846	Negative	179	70.9	0.76	180.063	[M-H]-	-50	-30	C00031	D(+)-Glucose	Carbohydrates	0.194908	11000000	7790000	9720000	7230000	8550000	7300000	5200000	13200000	5640000	6790000	7110000	5860000	7870000	15500000	8600000	6190000	4790000	5540000	8890000	11800000	9130000	11700000	ko00010,ko00030,ko00052,ko00500,ko00520,ko00521,ko00524,ko00901,ko01100,ko01110,ko01130,ko02010,ko02020,ko02060,ko04066,ko04068,ko04113,ko04152,ko04742,ko04910,ko04911,ko04917,ko04922,ko04930,ko04931,ko04932,ko04933,ko04973,ko04976,ko04978,ko05111,ko05230
CdM829	pme0279	Negative	189.095	128.1	0.77	190.095	[M-H]-	-50	-30	C00666	2,6-Diaminooimelic acid	Amino acid derivatives	0.175655	198000	168000	130000	153000	166000	11300	267000	33100	310000	28200	353000	34600	134000	11200	231000	21900	56900	11000	527000	22300	11600	11000	C00666	ko00300,ko01100,ko01110,ko01120,ko01130,ko01230
CdM831	pme2019	Negative	149	58.9	0.77	150.053	[M-H]-	-50	-30	-	DL-Arabinose	Carbohydrates	0.0696907	3070000	2860000	2600000	2760000	2120000	2720000	1930000	3380000	1600000	1940000	4530000	4410000	1890000	3100000	1410000	3350000	2200000	1820000	1230000	4370000	2620000	3050000	--	--
CdM835	pme3387	Negative	187	145.1	0.77	188.127	[M-H]-	-50	-30	C01924	H-HomoArg-OH	Amino acid derivatives	0.0991928	163000	130000	138000	150000	136000	44100	243000	95300	361000	59100	201000	66500	206000	46000	529000	88600	96200	58300	112000	127000	35900	39200	--	--
CdM837	pme0195	Negative	120.02	80	0.78	121.02	[M-H]-	-50	-30	C00097	L-Cysteine	Amino acids	0.130133	122000	141000	103000	117000	9400	563000	286000	42600	272000	502000	9	9	9	9	9	9	9	9	9	114000	77200	408000	ko00260,ko00270,ko00311,ko00332,ko00430,ko00460,ko00480,ko00730,ko00770,ko00920,ko00970,ko01060,ko01100,ko01110,ko01120,ko01130,ko01200,ko01230,ko04122,ko04216,ko04974,ko05230
CdM838	pme0519	Negative	341	58.8	0.78	342.116	[M-H]-	-50	-30	-	D-(+)-Sucrose	Carbohydrates	0.0472374	2340000	2160000	2400000	2230000	857000	5010000	1830000	883000	1570000	2690000	1930000	1400000	2920000	7850000	1140000	345000	1350000	7330000	1370000	6220000	3460000	6230000	--	--
CdM839	pme1021	Negative	177.14	70.8	0.78	178.048	[M-H]-	-50	-30	C00198	D-(+)-Glucono-1,5-lactone	Carbohydrates	0.118673	49900	60300	66900	58800	93200	129000	10500	136000	18000	51100	29300	38600	78300	209000	33700	39300	55600	33800	59900	82800	83100	54500	C00198	ko00030,ko01100,ko01110,ko01120,ko01130,ko01200
CdM840	pme2758	Negative	162	144.1	0.78	163.129	[M-H]-	-50	-30	C03079	4-Hydroxy-L-glutamic acid	Amino acid derivatives	0.201709	27500	27100	18100	20600	30500	8090	30900	22900	27300	9390	18600	24800	34800	11500	36000	22300	46200	14100	25600	15700	15900	12200	--
CdM847	pme2253	Negative	177.14	74.8	0.81	178.048	[M-H]-	-50	-30	C01040	L-Gulonic-γ-lactone	Carbohydrates	0.108686	190000	171000	213000	170000	295000	166000	357000	157000	673000	193000	442000	130000	292000	121000	517000	342000	232000	33200	260000	95000	167000	76100	C01040	ko00053,ko01100
CdM850	pme3351	Negative	144.1	126.1	0.82	145.074	[M-H]-	-50	-30	C04076	Allysine(6-Oxo DL-Norleucine)	Amino acid derivatives	0.195701	182000	153000	132000	116000	203000	54400	263000	33600	238000	31200	313000	43300	321000	51200	645000	46600	11300	13400	88600	24600	23100	7320	ko00300,ko00310,ko00960,ko01060,ko01064,ko01100,ko01110,ko01130,ko01230
CdM853	pme2529	Negative	163.2	162.9	0.83	164.069	[M-H]-	-50	-30	C07326	1,5-Anhydro-D-glucitol	Alcohols and polyols	0.0357863	471000	475000	503000	464000	737000	543000	481000	513000	342000	457000	523000	401000	672000	604000	320000	596000	510000	169000	686000	217000	593000	187000	--	--
CdM854	pme2050	Negative	191	131	0.84	192.027	[M-H]-	-50	-30	C00158	Citric acid	Organic acids	0.0425908	149000000	143000000	139000000	153000000	79500000	45700000	99800000	71500000	181000000	68800000	139000000	90700000	90700000	123000000	186000000	170000000	157000000	127000000	134000000	156000000	141000000	84800000	ko00020,ko00250,ko00630,ko00720,ko01060,ko01061,ko01062,ko01063,ko01064,ko01065,ko01066,ko01070,ko01100,ko01110,ko01120,ko01130,ko01200,ko01210,ko01230,ko02020,ko04742,ko04922,ko05230
CdM856	pmb2826	Negative	147	85	0.92	148	[M-H]-	-50	-30	C00815	Citramalate	Organic acids	0.144041	753000	761000	548000	725000	453000	280000	1170000	755000	1020000	427000	1820000	595000	905000	615000	1470000	461000	380000	331000	1140000	1400000	537000	655000	--
CdM858	pme1851	Negative	130.07	88	0.93	131.07	[M-H]-	-50	-30	C00300	Creatine	Organic acids	0.0546768	4540000	4390000	4010000	4480000	3000000	1930000	2700000	6810000	3790000	1670000	3910000	8030000	3350000	4000000	2770000	9380000	766000	2650000	5770000	9990000	1740000	1840000	C00300	ko00260,ko00330,ko01100
CdM861	pme3719	Negative	165.05	74.9	0.95	166.048	[M-H]-	-50	-30	-	D-Xylonic acid	Organic acids	0.0380228	13700000	13300000	12500000	13100000	14000000	9600000	12200000	21100000	10500000	7410000	11100000	15800000	7920000	23700000	12600000	19500000	9500000	5000000	13400000	20400000	10800000	10200000	--
CdM862	pmb2507	Negative	213.1	78.9	0.97	214.1	[M-H]-	-50	-30	C00672	2-Deoxyribose 1-phosphate	Carbohydrates	0.146016	288000	232000	253000	323000	285000	65800	306000	70800	562000	31300	246000	547000	847000	87800	1070000	93600	379000	975000	1570000	50900	130000	90500	C00672	ko00030,ko00240
CdM864	pme3313	Negative	259	78.8	0.97	260.03	[M-H]-	-50	-30	C00085	D-Fructose 6-phosphate	Carbohydrates	0.0554969	1400000	1530000	1370000	1360000	1010000	963000	1750000	1060000	1100000	1050000	1520000	634000	2740000	1970000	2840000	908000	1690000	340000	5430000	443000	522000	396000	C00085	ko00052,ko00500,ko00680,ko00710,ko01100,ko01120,ko01200,ko04152,ko04922,ko04931,ko05230
CdM874	pme2165	Negative	155	111	1.08	156.017	[M-H]-	-50	-30	C00295	Orotic acid	Vitamins	0.135716	273000	223000	206000	267000	142000	77700	160000	107000	242000	59000	595000	76300	313000	128000	311000	181000	185000	96600	150000	208000	181000	87800	ko00240,ko01100
CdM879	pmb2922	Negative	565.1	323.3	1.12	566.1	[M-H]-	-50	-30	C00029	Uridine 5'-diphospho-D-glucose	Nucleotide and its derivates	0.186892	5710000	5090000	4750000	7150000	13000000	1700000	7700000	3160000	5990000	1600000	8730000	572000	23900000	8760000	13100000	1300000	7610000	1020000	24000000	2130000	6820000	1680000	C00029	ko00040,ko00052,ko00053,ko00240,ko00500,ko00520,ko00524,ko00561,ko00908,ko01051,ko01060,ko01100,ko01130
CdM881	pme1363	Negative	662.11	540.1	1.13	663.109	[M-H]-	-50	-30	C00003	Nicotinic acid adenine dinucleotide	Nucleotide and its derivates	0.0311067	2660000	2860000	2790000	2820000	4090000	1110000	4770000	1780000	4520000	1540000	3910000	963000	6800000	2530000	5430000	1140000	1810000	1220000	5040000	2830000	2080000	3820000	ko00190,ko00730,ko00760,ko01100,ko04152,ko04211,ko04212,ko04925,ko04977
CdM882	pme2036	Negative	191	85	1.13	192.063	[M-H]-	-50	-30	C00296	Quinic acid	Quinate and its derivatives	0.139555	12700000	9370000	10700000	12500000	8260000	2370000	8250000	4320000	16500000	3810000	13100000	8050000	9240000	10200000	21400000	9670000	12000000	7490000	12200000	12800000	11900000	6780000	ko00400
CdM883	pme2380	Negative	145	80.8	1.13	146.022	[M-H]-	-50	-30	-	A-Ketoglutaric acid	Organic acids	0.0481756	3680000	3360000	3700000	3440000	1550000	3470000	1020000	1140000	569000	766000	1080000	983000	3020000	5520000	3360000	3540000	1410000	1990000	10400000	1120000	1850000	2250000	--	--
CdM884	pme2555	Negative	346	78.8	1.13	347.063	[M-H]-	-50	-30	C00020	Adenosine 5'-monophosphate	Nucleotide and its derivates	0.044715	843000	859000	831000	918000	1840000	457000	373000	327000	1530000	634000	968000	263000	1730000	581000	2830000	250000	260000	296000	524000	559000	337000	732000	ko00230,ko00908,ko01060,ko01065,ko01070,ko01100,ko01110,ko01130,ko01523,ko04022,ko04024,ko04068,ko04150,ko04151,ko04152,ko04211,ko04740,ko04742,ko04923,ko04924,ko04925,ko05012,ko05032
CdM885	pmb3264	Negative	611.1	306.2	1.14	612.1	[M-H]-	-50	-30	C00127	Glutathione oxidized	Amino acid derivatives	0.0773568	356000	407000	393000	429000	208000	70000	807000	82900	824000	90400	406000	54400	713000	13100	2850000	46900	248000	229000	829000	49100	208000	14500	C00127	ko00480,ko04216,ko04918
CdM888	pme1086	Negative	306	143	1.14	307.084	[M-H]-	-50	-30	C00051	Glutathione reduced form	Amino acid derivatives	0.262094	27400	47200	36800	28500	29200	17000	46600	10200	62900	23700	35900	28200	41900	24600	86300	31500	47000	32400	40400	28800	30500	10500	ko00270,ko00480,ko01100,ko02010,ko04216,ko04918,ko04976
CdM889	pme2566	Negative	217	88	1.14	218.09	[M-H]-	-50	-30	C03740	(5-L-Glutamyl)-L-amino acid	Amino acid derivatives	0.0417188	139000	131000	134000	144000	38700	109000	55000	213000	56500	72400	42300	61300	48800	303000	426000	308000	163000	183000	41500	234000	119000	147000	ko00480
CdM891	pme1368	Negative	128	126	1.15	129.079	[M-H]-	-50	-30	C00408	L-Pipecolic acid	Amino acid derivatives	0.0435343	50900	52200	47300	51600	99500	14300	85200	5690	91000	110000	44500	7890	75800	24000	47400	33100	109000	18900	39500	10500	76900	5280	ko00310,ko00960,ko01060,ko01064,ko01100,ko01110
CdM892	pme2278	Negative	362	78.9	1.15	363.058	[M-H]-	-50	-30	-	Guanosine monophosphate	Nucleotide and its derivates	0.159136	78200	72300	84300	57200	106000	26000	48800	33600	131000	18900	79300	11000	182000	48200	233000	33800	17600	7290	56100	36700	36300	66600	ko00230,ko01060,ko01065,ko01100,ko01523,ko04022,ko04740,ko04742,ko04744
CdM894	pme0075	Negative	188.1	102	1.16	189.064	[M-H]-	-50	-30	C00624	N-Acetyl-L-glutamic acid	Amino acid derivatives	0.0455216	2470000	2640000	2650000	2760000	2970000	1740000	3490000	2530000	2160000	2350000	2410000	421000	3360000	1540000	3700000	741000	897000	470000	4650000	2430000	2130000	993000	ko00220,ko01100,ko01110,ko01130,ko01210,ko01230
CdM896	pme0137	Negative	187.2	127.1	1.17	188.08	[M-H]-	-50	-30	-	Nα-Acetyl-L-glutamine	Amino acid derivatives	0.0493929	376000	367000	349000	393000	218000	429000	290000	584000	257000	340000	249000	212000	288000	396000	354000	463000	129000	305000	450000	1130000	266000	444000	--	--
CdM897	pme0256	Negative	151.033	108	1.17	152.033	[M-H]-	-50	-30	C00385	Xanthine	Nucleotide and its derivates	0.146341	90700	121000	97900	89600	697000	274000	44200	191000	62300	161000	115000	34400	46000	70700	64300	79400	11800	24900	39700	14600	19300	53700	ko00230,ko00232,ko01060,ko01065,ko01100,ko01110,ko01120
CdM899	pme2589	Negative	159.1	58.8	1.17	160.037	[M-H]-	-50	-30	C00322	Oxoadipic acid	Organic acids	0.125914	44400	42700	41300	54000	33000	90900	18000	82000	17800	46900	27500	30100	24900	51400	30800	90800	32800	23200	28100	84600	57800	59800	ko00300,ko00310,ko00380,ko00680,ko01100,ko01120,ko01130,ko01210,ko01230
CdM901	pme1692	Negative	347	78.8	1.18	348.047	[M-H]-	-50	-30	C00130	Inosine 5'-monophosphate	Nucleotide and its derivates	0.0849233	74300	70700	67200	60700	281000	28100	31100	26300	151000	48400	67000	30800	102000	41600	209000	19700	18400	28900	37000	47100	22500	46700	ko00230,ko01060,ko01065,ko01070,ko01100,ko01110,ko01130,ko01523,ko04742
CdM903	pme1063	Negative	243.1	110	1.19	244.07	[M-H]-	-50	-30	C00299	Uridine	Nucleotide and its derivates	0.0494196	2350000	2430000	2180000	2230000	4480000	747000	2480000	1100000	3480000	1190000	2980000	447000	3240000	966000	2900000	1410000	207000	194000	596000	1150000	556000	1660000	ko00240,ko01100
CdM904	pme2559	Negative	174	88	1.19	175.048	[M-H]-	-50	-30	C01042	N-Acetylaspartate	Amino acid derivatives	0.0486302	373000	384000	405000	415000	346000	294000	151000	464000	154000	229000	269000	321000	197000	397000	241000	1080000	77700	222000	613000	850000	234000	124000	C01042	ko00250,ko01100
CdM910	pme3970	Negative	243	153.1	1.2	244.07	[M-H]-	-50	-30	C02067	β-Pseudouridine	Nucleotide and its derivates	0.0466033	503000	559000	547000	524000	514000	592000	444000	769000	643000	585000	540000	475000	448000	444000	636000	735000	156000	203000	204000	459000	233000	387000	ko00240
CdM915	pme2651	Negative	742.1	620.2	1.22	743.075	[M-H]-	-50	-30	C00006	NADP	Others	0.048967	467000	428000	473000	437000	610000	173000	2030000	547000	1450000	145000	673000	280000	2440000	1320000	521000	394000	411000	134000	629000	1030000	198000	1070000	C00006	ko00195,ko00480,ko00760,ko01100,ko04918,ko04925
CdM916	pme1104	Negative	130.1	130.1	1.23	131.095	[M-H]-	-50	-30	C00407	L-Isoleucine	Amino acids	0.0574703	152000	142000	148000	133000	112000	43200	166000	84600	164000	107000	274000	104000	109000	50600	409000	160000	138000	81600	140000	166000	63100	7690	ko00280,ko00290,ko00460,ko00960,ko00966,ko00970,ko01060,ko01064,ko01100,ko01110,ko01130,ko01210,ko01230,ko02010,ko04974,ko04978,ko05230
CdM919	pme3188	Negative	323	78.8	1.23	324.036	[M-H]-	-50	-30	C00105	Uridine 5'-monophosphate	Nucleotide and its derivates	0.0695793	537000	485000	454000	496000	1430000	188000	294000	122000	906000	225000	748000	43300	1350000	250000	1960000	184000	93100	39800	689000	88400	156000	124000	C00105	ko00240,ko01100
CdM931	pme1830	Negative	117.03	99.9	1.31	118.027	[M-H]-	-50	-30	C00042	Succinic acid	Organic acids	0.0352674	103000000	95100000	99100000	96500000	203000000	47000000	132000000	47300000	190000000	49300000	196000000	28000000	196000000	38000000	273000000	58100000	78500000	51400000	230000000	46700000	57300000	33600000	ko00020,ko00190,ko00250,ko00350,ko00360,ko00361,ko00620,ko00630,ko00640,ko00650,ko00720,ko00760,ko00920,ko01060,ko01061,ko01062,ko01063,ko01064,ko01065,ko01066,ko01070,ko01100,ko01110,ko01120,ko01130,ko01200,ko01220,ko02020,ko04024,ko04727,ko04922,ko05230
CdM932	pme0486	Negative	117.02	100	1.32	118.027	[M-H]-	-50	-30	C02170	Methylmalonic acid	Organic acids	0.02544	103000000	97200000	100000000	102000000	203000000	50100000	139000000	48800000	180000000	48300000	223000000	27600000	208000000	39700000	277000000	60800000	81700000	50600000	237000000	44600000	55700000	29900000	ko00240,ko00280,ko00640
CdM933	pme3096	Negative	118	73.9	1.32	119.022	[M-H]-	-50	-30	C00872	Aminomalonic acid	Organic acids	0.0278636	3870000	3680000	3710000	3630000	7620000	1480000	5250000	1680000	7760000	1570000	8580000	847000	8260000	1370000	12000000	2320000	2810000	1900000	9580000	1670000	2080000	1190000	--
CdM941	pme0207	Negative	103.047	103	1.39	104.047	[M-H]-	-50	-30	-	3-Hydroxybutyrate	Organic acids	0.148369	475000	355000	489000	501000	178000	521000	864000	9	9	9	420000	1410000	2400000	9	9	9	9	9	9	9	9	9	--	--
CdM942	pme1107	Negative	150	132.9	1.4	151.049	[M-H]-	-50	-30	C00242	Guanine	Nucleotide and its derivates	0.0745284	58300	49900	55700	50800	124000	25100	84800	29600	108000	16400	153000	14900	77400	32200	89300	60800	11500	19500	27500	21600	19000	42600	ko00230,ko01100
CdM944	pme2914	Negative	161	56.8	1.4	162.053	[M-H]-	-50	-30	C03761	3-Hydroxy-3-methylpentane-1,5-dioic acid	Amino acid derivatives	0.0507396	1680000	1690000	1520000	1690000	612000	2510000	330000	1550000	456000	1280000	749000	263000	378000	610000	999000	731000	2700000	2240000	956000	911000	3220000	3080000	--
CdM947	pme3982	Negative	267.08	135.1	1.43	268.081	[M-H]-	-50	-30	-	Hypoxanthine-9-β-D-arabinofuranoside	Nucleotide and its derivates	0.0445243	1430000	1390000	1320000	1300000	10300000	628000	1970000	136000	3860000	574000	1930000	104000	641000	1140000	679000	182000	168000	193000	97300	164000	456000	157000	--	--
CdM949	pme1175	Negative	282.092	150.1	1.47	283.092	[M-H]-	-50	-30	C00387	Guanosine	Nucleotide and its derivates	0.0407198	9080000	8730000	8460000	8270000	19700000	3570000	11600000	4860000	16200000	3870000	21800000	2120000	11300000	4140000	12800000	6450000	1710000	1220000	3960000	4380000	2720000	5980000	C00387	ko00230,ko01100
CdM954	pmb3099	Negative	153	78.9	1.61	154	[M-H]-	-50	-30	C06608	Diethyl phosphate	Organic acids	0.0392014	939000	866000	873000	918000	1020000	729000	313000	1530000	1560000	439000	2410000	1120000	374000	91800	1340000	1110000	1470000	90000	626000	1170000	875000	307000	ko00627
CdM960	pme2594	Negative	182.05	138.1	1.67	183.053	[M-H]-	-50	-30	C00847	4-Pyridoxic acid	Pyridine derivatives	0.0165266	371000	371000	368000	382000	67800	439000	33500	56800	101000	118000	83000	244000	164000	241000	91800	871000	611000	1460000	50400	912000	475000	679000	ko00750,ko01100,ko01120
CdM961	pme1181	Negative	266.097	150.1	1.69	267.097	[M-H]-	-50	-30	C00330	Deoxyguanosine	Nucleotide and its derivates	0.0330702	351000	332000	333000	325000	513000	25300	469000	26900	959000	26400	4040000	46400	411000	59000	356000	95600	18700	15600	106000	40500	89400	19900	C00330	ko00230,ko01100
CdM964	pme1294	Negative	283	151.1	1.77	284.076	[M-H]-	-50	-30	C01762	Xanthosine	Nucleotide and its derivates	0.0378475	3710000	3470000	3560000	3400000	5180000	2020000	4600000	1200000	14900000	2980000	8050000	2160000	2230000	2710000	3370000	1570000	658000	410000	953000	661000	1370000	1070000	C01762	ko00230,ko00232,ko01065,ko01100,ko01110
CdM968	pmb2684	Negative	328.1	134.2	1.84	329.1	[M-H]-	-50	-30	C00575	Cyclic AMP	Nucleotide and its derivates	0.0443109	82700	89200	88300	81800	199000	33500	115000	93600	164000	103000	233000	53900	102000	53400	154000	219000	22200	14500	32000	128000	24600	36000	C00575	ko00230,ko01522,ko02025,ko02026,ko04010,ko04014,ko04015,ko04020,ko04022,ko04024,ko04062,ko04072,ko04111,ko04113,ko04114,ko04211,ko04213,ko04261,ko04270,ko04340,ko04371,ko04540,ko04611,ko04670,ko04710,ko04713,ko04720,ko04723,ko04724,ko04725,ko04726,ko04727,ko04728,ko04740,ko04742,ko04750,ko04910,ko04911,ko04912,ko04913,ko04914,ko04915,ko04916,ko04918,ko04919,ko04921,ko04922,ko04923,ko04924,ko04925…
CdM969	pmb2685	Negative	213.1	154.9	1.85	214.1	[M-H]-	-50	-30	C00673	2-Deoxyribose 5'-phosphate	Carbohydrates	0.0405177	206000	223000	223000	225000	41100	1120000	581000	263000	279000	294000	9	9	9	9	9	9	9	9	9	227000	190000	473000	C00673	ko00030
CdM970	pme0130	Negative	165.1	165.1	1.86	166.049	[M-H]-	-50	-30	C16357	3-Methylxanthine	Nucleotide and its derivates	0.0595204	135000	126000	144000	142000	193000	29000	183000	40200	95100	17600	186000	242000	297000	30700	43700	60100	21400	15700	9930	11000	60000	24800	ko00232,ko01100,ko01110,ko01120
CdM973	pmb2871	Negative	315.1	152.1	1.9	316.1	[M-H]-	-50	-30	-	2,5-dihydroxy benzoic acid O-hexside	Benzoic acid derivatives	0.0938741	3690000	3550000	4260000	3490000	1600000	721000	403000	399000	668000	678000	1150000	1040000	3890000	3170000	1450000	2970000	1900000	3930000	2370000	11200000	4730000	6780000	--
CdM977	pmb3142	Negative	299.1	137.2	1.92	300.1	[M-H]-	-50	-30	-	Salicylic acid O-glucoside	Phytohormones	0.0158899	95600000	97400000	93700000	95900000	98800000	10100000	232000000	14600000	122000000	9780000	249000000	9520000	204000000	10900000	305000000	64900000	15800000	7570000	128000000	16900000	8820000	7640000	--
CdM983	pme0020	Negative	164.1	147.1	1.97	165.079	[M-H]-	-50	-30	C00079	L-Phenylalanine	Amino acids	0.0314947	31400000	30100000	29100000	30500000	74100000	3700000	30900000	3020000	46600000	11100000	100000000	10100000	29800000	4200000	121000000	11900000	33100000	10400000	62700000	10400000	7180000	332000	ko00360,ko00400,ko00460,ko00940,ko00960,ko00966,ko00970,ko01060,ko01061,ko01063,ko01064,ko01070,ko01100,ko01110,ko01130,ko01210,ko01230,ko02010,ko04974,ko04978,ko05230
CdM986	pme0165	Negative	165.1	165.1	2.02	166.049	[M-H]-	-50	-30	C16358	1-Methylxanthine	Nucleotide and its derivates	0.0766974	564000	570000	663000	618000	190000	966000	179000	794000	144000	217000	434000	336000	250000	2310000	175000	761000	884000	82800	254000	1300000	600000	1890000	ko00232,ko01100,ko01110,ko01120
CdM988	pme0267	Negative	131.042	86.9	2.08	132.042	[M-H]-	-50	-30	-	2-Methylsuccinic acid	Organic acids	0.0198188	11000000	10600000	10900000	11100000	15400000	883000	17400000	564000	23800000	2000000	31500000	326000	20300000	1100000	12700000	562000	8030000	1220000	20700000	549000	2470000	710000	--
CdM989	pmb2928	Negative	331	313.7	2.09	332	[M-H]-	-50	-30	-	Gallic acid O-Hexoside	Benzoic acid derivatives	0.283656	46900	32200	23200	36400	9	9	9	9	9	9	9	9	9	22200	17500	12800	9	9	9	9	9	9	--
CdM991	pme1711	Negative	117.1	99.9	2.09	118.063	[M-H]-	-50	-30	-	3-Hydroxy-3-methyl butyric acid	Organic acids	0.0313379	1940000	1820000	1820000	1890000	4360000	129000	4370000	139000	4990000	184000	4720000	211000	2270000	165000	5160000	224000	35900	31100	7620000	421000	194000	110000	--
CdM998	pmb2933	Negative	311.1	149.2	2.19	312.1	[M-H]-	-50	-30	-	Caftaric acid	Hydroxycinnamoyl derivatives	0.0320492	1600000	1490000	1590000	1550000	715000	898000	2990000	1820000	929000	1180000	3770000	1300000	583000	498000	1940000	623000	828000	1620000	3160000	1480000	659000	1720000	--	--
CdM1001	pmb2554	Negative	529.1	355.9	2.23	530.1	[M-H]-	-50	-30	-	5-O-Feruloyl quinic acid glucoside	Quinate and its derivatives	0.139801	12700	11500	10500	9090	9	9	9	9910	7520	5130	9	9	9	9	9	9	9	9	9	9	9	9	--
CdM1002	pmb2819	Negative	665.1	323.4	2.23	666.1	[M-H]-	-50	-30	-	O-Caffeoyl maltotriose	Hydroxycinnamoyl derivatives	0.0639284	17700	15200	16400	16000	7280	7420	13900	15100	5040	13200	31500	68900	11900	10000	25800	23700	17000	14600	25500	21700	25100	6030	--
CdM1003	pmb2833	Negative	529	329.3	2.23	530	[M-H]-	-50	-30	-	3-O-Feruloyl quinic acid glucoside	Quinate and its derivatives	0.228399	12700	7680	9840	8460	9	9	9	12800	11000	9170	9	9	9	9	9	9	9	9	9	9	9	9	--
CdM1004	pme1292	Negative	167.1	122.1	2.26	168.042	[M-H]-	-50	-30	C00544	Homogentisic acid	Organic acids	0.0561859	208000	211000	188000	213000	334000	109000	264000	376000	198000	141000	294000	117000	153000	194000	173000	192000	144000	108000	481000	265000	361000	101000	ko00130,ko00350,ko00643,ko01100,ko01120
CdM1006	pmb2970	Negative	625.2	463.3	2.29	626.2	[M-H]-	-50	-30	-	Hesperetin O-hexosyl-O-hexoside	Flavanone	0.17505	134000	89800	114000	99900	27600	52400	44900	68000	26900	78100	47600	21100	74000	94600	18200	293000	176000	161000	31300	118000	447000	168000	--
CdM1009	pme3965	Negative	310	178.1	2.32	311.123	[M-H]-	-50	-30	-	2-(dimethylamino)guanosine	Nucleotide and its derivates	0.050913	639000	615000	693000	640000	803000	1330000	666000	624000	982000	1010000	2370000	226000	706000	267000	2140000	598000	53400	25600	1200000	34600	104000	140000	--
CdM1010	pmb3107	Negative	359.1	197.1	2.34	360.1	[M-H]-	-50	-30	-	Syringic acid O-glucoside	Benzoic acid derivatives	0.0387224	1770000	1740000	1660000	1630000	841000	1120000	645000	917000	1270000	1180000	1210000	1790000	1130000	1340000	421000	2590000	1230000	2690000	1850000	2280000	3730000	1980000	--	--
CdM1011	pmb2556	Negative	345.1	167.2	2.35	346.1	[M-H]-	-50	-30	-	Syringaldehyde O-glucoside	Others	0.0972344	68100	82000	66300	72200	23000	24300	21600	40000	42000	43900	35600	41200	38400	9	9	9	15100	221000	28600	166000	41300	239000	--	--
CdM1015	pmb2561	Negative	190.1	84	2.43	191.1	[M-H]-	-50	-30	C02712	N-Acetylmethionine	Amino acid derivatives	0.13058	499000	362000	436000	456000	111000	317000	195000	876000	107000	354000	131000	577000	50200	368000	245000	510000	170000	887000	297000	1040000	386000	763000	--	--
CdM1016	pme2598	Negative	167.1	139	2.43	168.042	[M-H]-	-50	-30	-	3,4-Dihydroxybenzeneacetic acid	Organic acids	0.053811	338000	305000	346000	331000	131000	459000	161000	239000	114000	195000	403000	136000	163000	835000	180000	501000	531000	215000	140000	304000	341000	668000	--	--
CdM1018	pmb4486	Negative	579.1	423.5	2.44	580.1	[M-H]-	-50	-30	C08308	Hordatine B	Phenolamides	0.111377	43500	55900	55000	54200	105000	39700	52700	35100	38000	19400	47300	45800	92100	42400	23700	20600	114000	53000	63200	21600	22500	47100	--	--
CdM1021	pmb3064	Negative	499.2	173.2	2.45	500.2	[M-H]-	-50	-30	-	3-O-p-coumaroyl quinic acid O-hexoside	Quinate and its derivatives	0.0280783	91600	94500	97800	93100	197000	10400	260000	13000	195000	14200	166000	295000	423000	6420	376000	191000	10900	148000	286000	17200	23900	10500	--
CdM1024	pmb2986	Negative	709.1	547.3	2.49	710.1	[M-H]-	-50	-30	-	Chrysoeriol O-hexosyl-O-malonylhexoside	Flavone	0.269585	10600	11700	8810	16300	9	9	9	4010	5770	7520	9	9	9	11900	29600	47200	9	9	9	29700	16900	60400	--	--
CdM1026	pme3375	Negative	359.2	179.1	2.5	360.129	[M-H]-	-50	-30	-	Aminophylline	Alkaloids	0.0642709	1200000	1140000	1290000	1120000	9	9	9	121000	168000	214000	332000	160000	246000	112000	145000	129000	91400	11200000	5650000	680000	4440000	557000
CdM1028	pmb3066	Negative	481.1	445.4	2.52	482.1	[M-H]-	-50	-30	-	5-O-p-coumaroyl shikimic acid O-hexoside	Quinate and its derivatives	0.0976444	35800	37600	44700	39300	14500	134000	254000	9	9	9	114000	67700	21300	9	9	9	9	9	9	9	9	9	--
CdM1029	pmb2831	Negative	315.1	153.2	2.53	316.1	[M-H]-	-50	-30	-	Protocatechuic acid O-glucoside	Catechin derivatives	0.0447838	2600000	2710000	2610000	2860000	4600000	6460000	1410000	3670000	1900000	124000	2720000	3090000	1190000	1350000	4330000	4190000	3140000	5230000	4400000	3480000	354000	810000	--
CdM1030	pmb2954	Negative	771.1	609.5	2.53	772.1	[M-H]-	-50	-30	-	Luteolin O-hexosyl-O-hexosyl-O-hexoside	Flavone	0.152551	17200	12900	13800	17500	82300	51800	21200	3220	120000	61600	9	9	9	9	9	9	9	9	9	9	9	9	--
CdM1032	pme0094	Negative	447.3	284.1	2.55	448.3	[M-H]-	-50	-30	C08604	Cyanidin 3-O-glucoside (Kuromanin)	Anthocyanins	0.143352	26800	35600	34800	28200	36000	16400	52800	15400	53100	18400	47200	66000	33600	7930	18000	17800	6170	32900	19600	34200	20600	224000	ko00942
CdM1034	pmb2987	Negative	487.1	283.2	2.57	488.1	[M-H]-	-50	-30	-	Acacetin O-acetyl hexoside	Flavone	0.0184545	612000	614000	631000	604000	504000	148000	1280000	82500	810000	99800	1940000	23900	955000	178000	2150000	165000	69600	40200	1150000	99600	169000	227000	--
CdM1035	pme0272	Negative	149.032	76.9	2.57	150.032	[M-H]-	-50	-30	C02137	Benzoylformic acid	Organic acids	0.0790375	298000	311000	351000	345000	405000	89800	270000	76600	198000	40800	475000	32300	969000	300000	215000	197000	47400	132000	216000	288000	113000	884000	C02137	ko00360,ko00627,ko01120
CdM1036	pme1814	Negative	153	108.1	2.57	154.027	[M-H]-	-50	-30	C00628	2,5-dihydroxybenzoic acid (Gentisic acid)	Benzoic acid derivatives	0.167348	52200	58000	46000	39000	60500	19900	54800	22500	57900	95000	78400	56700	35000	30600	89100	98700	27900	46600	50000	39600	36700	20300	ko00350,ko00362,ko00626,ko01100,ko01120
CdM1037	pme1816	Negative	353	191.1	2.58	354.095	[M-H]-	-50	-30	C17147	Neochlorogenic acid (5-O-Caffeoylquinic acid)	Quinate and its derivatives	0.210224	87900	75700	66800	52600	225000	83700	197000	57000	119000	66900	89900	51200	66400	33800	51600	42700	53800	78600	46600	28900	50200	38900	--	--
CdM1038	pme2427	Negative	222.1	163	2.61	223.085	[M-H]-	-50	-30	-	N-Acetyl-L-tyrosine	Amino acid derivatives	0.0147048	3330000	3290000	3350000	3240000	1390000	1200000	1080000	3330000	1410000	601000	808000	7510000	1020000	1720000	1500000	3000000	2750000	5820000	4490000	10800000	1100000	1110000	--
CdM1039	pme0056	Negative	145.1	101	2.63	146.058	[M-H]-	-50	-30	-	2,3-dimethylsuccinic acid	Amino acid derivatives	0.0996726	1020000	927000	891000	1110000	2080000	1790000	1500000	9	9	9	2150000	1710000	1260000	9	9	9	9	9	9	9	9	9	--	--
CdM1040	pme0245	Negative	145.058	80.9	2.63	146.058	[M-H]-	-50	-30	C06104??	Adipic acid	Organic acids	0.0249935	1180000	1130000	1130000	1180000	2570000	2200000	1820000	9	9	9	2740000	2170000	1590000	1420000	2620000	228000	347000	243000	2520000	252000	279000	225000	--
CdM1041	pme3309	Negative	145.06	101.1	2.63	146.058	[M-H]-	-50	-30	-	2-Methylglutaric acid	Organic acids	0.0785074	1150000	1040000	1020000	1200000	2420000	2050000	1680000	9	9	9	2430000	1900000	1360000	9	9	9	9	9	9	9	9	9	--
CdM1042	pme3346	Negative	131.08	70.8	2.63	132.079	[M-H]-	-50	-30	-	5-hydroxyhexanoic acid	Organic acids	0.0672004	4120000	3860000	3610000	3570000	999000	548000	916000	549000	1130000	1270000	630000	71700	9380000	6950000	9330000	8400000	828000	785000	1500000	352000	431000	1140000	--	--
CdM1043	pme2706	Negative	153.2	109	2.64	154.027	[M-H]-	-50	-30	C00196	2,3-Dihydroxybenzoic acid	Organic acids	0.040437	1320000	1290000	1320000	1210000	1910000	1330000	1090000	319000	1130000	765000	1180000	43300	1910000	431000	1030000	480000	1300000	1120000	1370000	123000	1070000	910000	C00196	ko00362,ko00627,ko01053,ko01061,ko01110,ko01120,ko01130
CdM1045	pme2603	Negative	152	108.1	2.67	153.043	[M-H]-	-50	-30	C00632	3-Hydroxyanthranilic acid	Organic acids	0.211963	111000	127000	131000	78800	9	9	9	9	9	9	9	9	9	163000	167000	170000	9	9	9	350000	282000	214000	ko00380,ko00627,ko01100,ko01120
CdM1047	pme0233	Negative	188.043	144.1	2.71	189.043	[M-H]-	-50	-30	C01717	Kynurenic acid	Organic acids	0.0689074	81200	85600	76200	89500	44800	40200	121000	55500	91300	19700	398000	210000	22200	56000	238000	24500	61100	155000	200000	51600	51300	70300	ko00380,ko01100
CdM1048	pme3428	Negative	339.1	177.1	2.71	340.079	[M-H]-	-50	-30	C09264	Esculin (6,7-Dihydroxycoumarin-6-glucoside)	Coumarins	0.0427141	2060000	1890000	1930000	1880000	1600000	31200	7480000	30600	2160000	17200	24400000	327000	584000	17200	5380000	229000	106000	137000	2690000	86000	63900	88400	--	--
CdM1050	pme3246	Negative	341	179.1	2.72	342.132	[M-H]-	-50	-30	C00761	Coniferin	Hydroxycinnamoyl derivatives	0.0232893	135000000	137000000	132000000	130000000	133000000	15000000	188000000	63200000	126000000	37300000	211000000	28300000	230000000	23700000	229000000	169000000	24200000	31500000	165000000	62700000	70700000	93900000	ko00940
CdM1051	pmb3101	Negative	175.1	131.3	2.74	176.1	[M-H]-	-50	-30	C02504	2-Isopropylmalate	Organic acids	0.0595738	50300000	46500000	44700000	44200000	12300000	6700000	10300000	6750000	13400000	16200000	7050000	769000	114000000	95400000	119000000	112000000	9110000	8100000	17800000	3330000	5050000	12400000	C02504	ko00290,ko00620,ko01100,ko01110,ko01210,ko01230
CdM1053	pme3478	Negative	277.13	146.2	2.75	278.13	[M-H]-	-50	-30	C00831	Pantetheine	Vitamins	0.039282	450000	430000	422000	410000	242000	85300	909000	1500000	306000	61400	2190000	354000	171000	67800	287000	13500	31700	162000	518000	239000	176000	895000	C00831	ko00332,ko00770,ko01130
CdM1054	pme1434	Negative	371.1	209.2	2.76	372.142	[M-H]-	-50	-30	C01533	Syringin	Hydroxycinnamoyl derivatives	0.00394206	5480000	5490000	5450000	5500000	9	9	9	3370000	4560000	5740000	9	9	9	1030000	1500000	1960000	1250000	17700000	9480000	8740000	9760000	15900000	C01533	ko00940
CdM1055	pme2746	Negative	784.2	437.2	2.78	785.157	[M-H]-	-50	-30	C00016	Flavin adenine dinucleotide (FAD)	Nucleotide and its derivates	0.10628	2770000	2150000	2600000	2430000	1590000	1100000	9670000	3160000	8770000	973000	6600000	2310000	7820000	4610000	4340000	1630000	1750000	1530000	2070000	2910000	929000	4780000	ko00740,ko01100,ko01110,ko04977
CdM1056	pmb3071	Negative	673.1	482.3	2.83	674.1	[M-H]-	-50	-30	-	O-p-Coumaroyl quinacyl quinic acid O-hexoside	Quinate and its derivatives	0.162952	378000	268000	390000	381000	64500	1430000	153000	372000	98400	256000	116000	124000	52100	55100	41000	27300	161000	555000	63800	1250000	201000	1030000	--
CdM1057	pmb3068	Negative	337.1	155.8	2.84	338.1	[M-H]-	-50	-30	-	1-O-p-Coumaroyl quinic acid	Quinate and its derivatives	0.102978	22500	18500	22300	19000	22100	18200	39500	3190	36300	19700	40700	26700	19700	9	9	9	9	9	9	9	9	9	--	--
CdM1058	pme1473	Negative	296	134	2.85	297.09	[M-H]-	-50	-30	C00170	5'-Deoxy-5'-(methylthio)adenosine	Nucleotide and its derivates	0.0144517	1330000	1310000	1310000	1350000	2260000	672000	2430000	1390000	2210000	1200000	3610000	281000	3090000	1280000	4730000	1310000	1130000	136000	4160000	181000	682000	293000	C00170	ko00270,ko00908,ko01060,ko01100
CdM1059	pme3198	Negative	153	109	2.85	154.027	[M-H]-	-50	-30	-	2,4-Dihydroxybenzoic acid	Benzoic acid derivatives	0.0762151	1830000	1680000	1650000	1520000	1850000	4090000	6320000	9	9	9	1350000	1840000	2330000	9	9	9	9	9	9	9	9	9	--	--
CdM1060	pmb2961	Negative	547.1	503.4	2.87	548.1	[M-H]-	-50	-30	-	Peonidin O-malonylhexoside	Anthocyanins	0.0740802	309000	358000	341000	309000	112000	300000	302000	111000	191000	284000	595000	475000	242000	148000	220000	620000	98400	504000	164000	495000	348000	189000
CdM1064	pme0118	Negative	110.1	65.9	2.88	111.032	[M-H]-	-50	-30	C05942	Pyrrole-2-carboxylic acid	Amino acid derivatives	0.126524	14200	18800	17700	18900	15400	17400	19400	16300	15600	16000	22700	16100	23700	11500	45000	83300	9	9	9	9	9	9	C05942	ko00330
CdM1067	pme2362	Negative	151	105	2.91	152.047	[M-H]-	-50	-30	C01984	Mandelic acid	Organic acids	0.0548481	186000	175000	200000	186000	618000	66000	3400000	9	9	9	569000	358000	146000	9	9	9	9	9	9	9	9	9	ko00627,ko01120
CdM1069	pme0282	Negative	165.027	76.9	2.98	166.027	[M-H]-	-50	-30	C01606	Phthalic acid	Organic acids	0.0629837	168000	154000	178000	160000	116000	117000	309000	295000	48000	96700	158000	73000	110000	121000	165000	85000	98300	163000	306000	307000	191000	245000	ko00624,ko01100,ko01120,ko01220,ko02010
CdM1070	pme0205	Negative	289.079	125	2.99	290.079	[M-H]-	-50	-30	C06562	Catechin	Catechin derivatives	0.126355	53400	40300	42900	44100	9	9	9	9	9	9	10100	23300	16700	9	9	9	113000	21000	22000	13500	14600	12300	ko00941,ko01061,ko01110
CdM1071	pme0281	Negative	165.027	121.1	3	166.027	[M-H]-	-50	-30	C06337	Terephthalic acid	Organic acids	0.118396	2370000	2480000	1870000	2250000	1160000	2900000	2470000	2860000	1360000	1330000	1580000	829000	1710000	1770000	2470000	1330000	1440000	2120000	2480000	2880000	1500000	2480000	ko00624,ko00627,ko01100,ko01120,ko01220
CdM1072	pma6561	Negative	341	179.2	3.01	342	[M-H]-	-50	-30	-	Caffeic acid O-glucoside	Hydroxycinnamoyl derivatives	0.039757	8300000	7740000	7680000	7630000	3110000	1520000	4570000	1580000	2010000	1340000	9720000	6180000	1680000	1000000	2390000	5700000	5240000	17200000	5630000	16600000	12000000	16900000	--	--
CdM1073	pme2478	Negative	137.1	137	3.05	138.032	[M-H]-	-50	-30	C16700	Protocatechuic aldehyde	Catechin derivatives	0.0607069	1420000	1250000	1310000	1410000	1010000	1070000	729000	1090000	465000	2040000	598000	339000	840000	2390000	1570000	2540000	643000	1470000	1460000	1190000	1290000	1180000	C16700	ko00950,ko01063
CdM1079	pmb3072	Negative	481.1	319.3	3.13	482.1	[M-H]-	-50	-30	-	3-O-p-coumaroyl shikimic acid O-hexoside	Quinate and its derivatives	0.0750829	77100	83000	71000	71300	9	9	9	46600	82300	118000	9	9	9	9	9	9	9	9	9	82700	19300	153000	--
CdM1080	pmb2940	Negative	385.1	223.2	3.15	386.1	[M-H]-	-50	-30	-	1-O-beta-D-Glucopyranosyl sinapate	Hydroxycinnamoyl derivatives	0.0728594	42500	41800	37900	36600	143000	91200	39400	64000	53900	74000	76800	161000	245000	72200	351000	212000	9	9	9	9	9	9	--
CdM1081	pme0176	Negative	263.1	145.1	3.16	264.111	[M-H]-	-50	-30	C04148	Phenylacetyl-L-glutamine	Amino acid derivatives	0.0851361	45200	52200	45700	43000	75100	4250	173000	128000	248000	7660	18800	29900	41000	16500	130000	7980	11700	4210	8240	6360	4650	11100	C04148	ko00360
CdM1086	pme3416	Negative	177	133.1	3.19	178.027	[M-H]-	-50	-30	C09263	Esculetin (6,7-dihydroxycoumarin)	Coumarins	0.121118	258000	304000	339000	335000	148000	198000	248000	427000	150000	77000	924000	1110000	370000	1300000	1280000	1310000	57500	34500	260000	328000	78600	175000	C09263	ko01061
CdM1087	pmb2965	Negative	619.1	531.3	3.2	620.1	[M-H]-	-50	-30	-	Cyanidin O-diacetyl-hexoside-O-glyceric acid	Anthocyanins	0.0478734	22800	24900	25300	23600	9	9	9	22100	13900	5610	9	9	9	58800	91900	125000	9	9	9	43900	69200	18600
CdM1088	pme2263	Negative	243.09	166.1	3.21	244.088	[M-H]-	-50	-30	C00120	Biotin	Vitamins	0.049351	30800	34500	31700	31900	34700	15300	40900	16300	67000	20100	41300	14800	39300	26100	84200	5900	37500	28600	87500	21000	39800	18200	ko00780,ko01100,ko02010,ko04977
CdM1091	pme1820	Negative	151	107.1	3.25	152.047	[M-H]-	-50	-30	C00642	p–Hydroxyphenyl acetic acid	Organic acids	0.0450332	182000	196000	201000	200000	683000	63600	3110000	9	9	9	819000	481000	142000	9	9	9	9	9	9	9	9	9	ko00350,ko00360,ko01120,ko01220
CdM1096	pmb3023	Negative	449.1	329.3	3.3	450.1	[M-H]-	-50	-30	-	Eriodictyol C-hexoside	Flavone C-glycosides	0.0615952	358000	409000	385000	363000	38600	869000	1700000	9	9	9	990000	803000	615000	33200	666000	447000	9	9	9	9	9	9	--
CdM1098	pmb3024	Negative	447.1	327.3	3.37	448.1	[M-H]-	-50	-30	-	Luteolin C-hexoside	Flavone C-glycosides	0.305196	17500	30700	18900	31700	83800	75500	35000	19300	34400	13500	5680	13400	53900	9	9	9	9	9	9	9	9	9
CdM1101	pme0252	Negative	172.105	130	3.41	173.105	[M-H]-	-50	-30	C02710	N-Acetyl-l-leucine	Amino acid derivatives	0.0224673	22200000	21100000	21400000	21300000	6940000	13500000	12400000	31700000	14200000	7990000	7270000	26700000	7620000	16200000	18600000	23500000	6800000	33000000	23600000	110000000	11100000	9770000	--
CdM1103	pme3484	Negative	479.09	317.3	3.43	480.09	[M-H]-	-50	-30	-	Myricetin 3-O-galactoside	Flavonol	0.104416	58900	72600	74100	65000	13800	43500	73100	33900	59400	8400	94600	138000	182000	5460	339000	99900	44200	6630	85400	29000	23400	23900	--
CdM1108	pmb3074	Negative	337.1	190.9	3.46	338.1	[M-H]-	-50	-30	-	3-O-p-Coumaroyl quinic acid	Quinate and its derivatives	0.315252	12600	16100	10200	7490	57800	18100	108000	9	9	9	81600	76300	70900	16500	78400	47500	9	9	9	9	9	9	--	--
CdM1109	pme2895	Negative	319.05	193	3.47	320.053	[M-H]-	-50	-30	C02906	Dihydromyricetin	Flavonol	0.133555	135000	137000	115000	103000	9	9	9	9	9	9	39600	454000	247000	78000	30900	125000	842000	641000	25400	734000	45200	165000
CdM1110	pme0286	Negative	131.079	85	3.48	132.079	[M-H]-	-50	-30	-	2-Hydroxyisocaproic acid	Organic acids	0.089006	29700	31100	25700	31400	89300	34600	40700	25700	37000	31400	72200	75600	79000	9	9	9	9	9	9	9	9	9	--	--
CdM1114	pme2129	Negative	131.08	68.9	3.51	132.079	[M-H]-	-50	-30	-	(S)-(-)-2-Hydroxyisocaproic acid	Organic acids	0.102337	110000	136000	126000	139000	432000	132000	249000	93100	205000	85000	325000	39500	240000	57100	368000	36800	130000	35400	119000	99100	43400	39000	--
CdM1115	pme3208	Negative	445	282.1	3.51	446.121	[M-H]-	-50	-30	C16195	Glycitin	Isoflavone	0.138218	46300	42300	33000	39900	9	9	9	9	9	9	9	9	9	9	9	9	9	9	9	101000	139000	66900	ko00943
CdM1121	pmb2976	Negative	755.1	311.4	3.64	756.1	[M-H]-	-50	-30	-	Chrysoeriol C-pentosyl-O-hexosyl-O-hexoside	Flavone C-glycosides	0.129965	14100	17300	17900	19400	20300	5180	37500	3060	10600	15600	9890	2960	3290	1220	9050	38800	17300	62300	12400	24700	12000	5570	--
CdM1123	pme1605	Negative	593.159	285.1	3.66	594.159	[M-H]-	-50	-30	-	Kaempferol 3-O-robinobioside (Biorobin)	Flavonol	0.0909059	36800	29600	34100	32400	150000	107000	64500	9	9	9	29500	48900	68200	9	9	9	9	9	9	9	9	9	--
CdM1127	pmb2873	Negative	214.1	134.2	3.69	215.1	[M-H]-	-50	-30	-	3-(2-Naphthyl)-D-alanine	Amino acid derivatives	0.0913561	251000	284000	230000	243000	109000	185000	398000	121000	97600	83400	559000	337000	170000	489000	202000	414000	206000	142000	207000	257000	387000	276000	--
CdM1130	pme0374	Negative	431.106	431.1	3.7	432.106	[M-H]-	-50	-30	C01714	Isovitexin	Flavone C-glycosides	0.166812	32400	26800	28100	21400	12400	60600	81700	51200	59400	62900	4340	39000	21300	4210	34700	19500	17500	35200	12500	21700	17000	47400	ko00944
CdM1132	pmb2991	Negative	739.1	269.3	3.72	740.1	[M-H]-	-50	-30	-	Apigenin O-hexosyl-O-rutinoside	Flavone	0.0663904	182000	192000	189000	165000	38400	53200	45800	158000	25000	51500	149000	281000	16500	78800	32400	432000	888000	631000	10500	360000	852000	218000	--	--
CdM1135	pmb3041	Negative	521.1	329.3	3.74	522.1	[M-H]-	-50	-30	-	Tricin O-saccharic acid	Flavone	0.043527	6710000	6870000	6550000	6200000	6870000	10200000	1250000	13800000	2040000	4460000	3850000	21600000	1370000	1780000	3330000	1150000	22900000	11400000	2240000	10700000	16500000	16700000	--
CdM1143	pme0369	Negative	593.159	285.1	3.79	594.159	[M-H]-	-50	-30	-	Kaempferol 3-O-rutinoside (Nicotiflorin)	Flavonol	0.11387	32200	41000	39300	34100	149000	97300	45600	9	9	9	9	9	9	9	9	9	9	9	9	9	9	9	--
CdM1148	pme1598	Negative	463.132	301.1	3.81	464.132	[M-H]-	-50	-30	-	Hesperetin 5-O-glucoside	Flavanone	0.0697461	867000	1000000	929000	865000	751000	7380000	14000000	9	9	9	9	9	9	9	9	9	9	9	9	9	9	9	--
CdM1149	pme3211	Negative	463	301.1	3.81	464.096	[M-H]-	-50	-30	C05623	Quercetin 3-O-glucoside (Isotrifoliin)	Flavonol	0.0336208	871000	938000	884000	882000	737000	7270000	13800000	9	9	9	9	9	9	9	9	9	9	9	9	9	9	9	ko00944,ko01100,ko01110
CdM1152	pmb2591	Negative	245	203.2	3.83	246	[M-H]-	-50	-30	C03137	Acetyl tryptophan	Amino acid derivatives	0.087773	3750000	3300000	3080000	3200000	116000	359000	120000	377000	196000	91900	118000	2270000	83300	2930000	127000	3910000	2330000	16300000	550000	25900000	3860000	11400000	--
CdM1153	pme1436	Negative	163.047	119	3.83	164.047	[M-H]-	-50	-30	C00811	p-Coumaric acid	Hydroxycinnamoyl derivatives	0.0154905	11200000	11100000	11000000	10800000	20600000	458000	50000000	16800000	33500000	145000	14600000	176000	7650000	226000	33900000	709000	532000	342000	4720000	461000	208000	141000	ko00130,ko00350,ko00360,ko00940,ko00950,ko01061,ko01100,ko01110,ko01220
CdM1155	pme3123	Negative	209	179.1	3.83	210.089	[M-H]-	-50	-30	C02325	Sinapyl alcohol	Hydroxycinnamoyl derivatives	0.187118	89400	116000	86500	126000	13400	151000	15500	126000	24900	201000	8350	95800	16400	201000	11900	142000	142000	637000	37500	215000	472000	313000	ko00940,ko01061,ko01100,ko01110
CdM1157	pme3083	Negative	164.04	92	3.84	165.043	[M-H]-	-50	-30	-	2-(Formylamino)benzoic acid	Organic acids	0.0253623	1130000	1130000	1170000	1100000	1990000	44600	4840000	27900	3250000	42300	1420000	98100	763000	41600	3360000	93200	142000	119000	490000	58800	97400	24400	--
CdM1158	pme1637	Negative	179.079	146.1	3.86	180.079	[M-H]-	-50	-30	C00590	Coniferyl alcohol	Hydroxycinnamoyl derivatives	0.127956	57900	48000	63600	50800	9	9	9	9	9	9	9	9	9	49300	43300	55300	75500	929000	26900	9	9	9	ko00940,ko01061,ko01100,ko01110
CdM1162	pmb2977	Negative	739.2	740	3.9	740.2	[M-H]-	-50	-30	-	Chrysoeriol 8-C-pentosyl-O-rutinoside	Flavone C-glycosides	0.106082	180000	218000	184000	173000	36200	46400	21100	141000	28100	49700	12400	287000	17500	101000	16800	451000	797000	689000	14100	315000	761000	220000	--
CdM1164	pmb3026	Negative	505.1	301.2	3.91	506.1	[M-H]-	-50	-30	-	Quercetin O-acetylhexoside	Flavonol	0.154852	152000	175000	215000	164000	168000	2130000	4090000	9	9	9	9	9	9	9	9	9	9	9	9	9	9	9	--
CdM1173	pme0413	Negative	151.047	136.1	3.97	152.047	[M-H]-	-50	-30	C00755	Vanillin	Benzoic acid derivatives	0.0188062	1570000	1500000	1530000	1540000	1060000	1470000	856000	2440000	845000	1690000	1580000	1980000	1170000	265000	1850000	1240000	2270000	970000	1190000	2150000	2590000	1710000	ko00360,ko00627,ko01061,ko01063,ko01100,ko01110,ko01120
CdM1174	pmb3043	Negative	637.1	269.3	3.98	638.1	[M-H]-	-50	-30	-	Tricin 5-O-rutinoside	Flavone	0.0609724	2240000	2520000	2580000	2420000	411000	2810000	263000	1780000	408000	2680000	173000	1770000	460000	1940000	747000	5330000	5680000	5540000	3340000	5710000	5830000	3310000	--	--
CdM1175	pmb2979	Negative	549.2	387.3	3.99	550.2	[M-H]-	-50	-30	-	Hesperetin O-malonylhexoside	Flavanone	0.0585517	2560000	2450000	2750000	2770000	828000	2220000	859000	6470000	288000	5600000	2080000	1660000	376000	2340000	2780000	5410000	8420000	7530000	857000	4120000	3670000	1670000
CdM1179	pmb2835	Negative	181.1	151.1	4.02	182.1	[M-H]-	-50	-30	-	Syringaldehyde	Hydroxycinnamoyl derivatives	0.0675202	80800	77600	77400	68800	67200	53700	37200	62100	53700	108000	45600	54800	60500	132000	33400	182000	42100	29900	94300	113000	143000	102000	--
CdM1183	pme0305	Negative	193.058	134.1	4.03	194.058	[M-H]-	-50	-30	C01494	Ferulic acid	Hydroxycinnamoyl derivatives	0.0883272	168000	140000	169000	152000	118000	75700	168000	16900	314000	50000	345000	17800	201000	37900	1140000	451000	31900	96800	136000	83400	76800	38200	ko00940,ko01061,ko01100,ko01110
CdM1184	pme0422	Negative	193.058	134.1	4.03	194.058	[M-H]-	-50	-30	-	3-Hydroxy-4-methoxycinnamic acid	Hydroxycinnamoyl derivatives	0.082925	179000	152000	181000	182000	127000	73800	178000	18800	320000	37200	388000	18600	231000	37400	1190000	470000	42900	43300	148000	68200	85800	14800	--	--
CdM1186	pmb3005	Negative	621.1	299.4	4.08	622.1	[M-H]-	-50	-30	-	Chrysoeriol O-rhamnosyl-O-glucuronic acid	Flavone	0.0433417	723000	748000	745000	680000	2440000	8760	1230000	14600	2140000	356000	6070000	20200	1290000	15700	1610000	813000	9	9	9	9	9	9	--
CdM1189	pme1521	Negative	303.058	125.1	4.09	304.058	[M-H]-	-50	-30	C01617	Dihydroquercetin (Taxifolin)	Flavonol	0.291826	31400	24700	19400	16100	9800	112000	214000	9	9	9	60000	37200	14300	9	9	9	9	9	9	9	9	9	ko00941,ko01061,ko01100,ko01110
CdM1192	pme1657	Negative	137	92.8	4.12	138.032	[M-H]-	-50	-30	C00805	Salicylic acid (SA)	Phytohormones	0.147484	255000	185000	220000	256000	176000	172000	190000	868000	160000	206000	334000	307000	183000	173000	228000	339000	200000	181000	184000	180000	188000	138000
CdM1193	pmb3045	Negative	505.1	330.3	4.14	506.1	[M-H]-	-50	-30	-	Tricin O-glucuronic acid	Flavone	0.206283	16900	20000	26800	19100	9	9	9	43300	47500	51600	9	9	9	9	9	9	9	9	9	34900	62600	90200	--
CdM1202	pmb3046	Negative	491.1	431.2	4.21	492.1	[M-H]-	-50	-30	-	Tricin 7-O-hexoside	Flavone	0.110795	8390	10900	10500	9970	7070	26100	45200	9	9	9	9	9	9	9	9	9	9	9	9	9	9	9	--
CdM1203	pme0371	Negative	433.121	122.9	4.21	434.121	[M-H]-	-50	-30	C09099	Naringenin 7-O-glucoside (Prunin)	Flavanone	0.0497705	266000	250000	274000	281000	221000	457000	693000	20900	234000	15800	1020000	35200	235000	165000	324000	56700	9	9	9	9	9	9	ko00941
CdM1206	pmb3013	Negative	519.1	315.3	4.28	520.1	[M-H]-	-50	-30	-	Isorhamnetin O-acetyl-hexoside	Flavonol	0.0980356	2050000	1890000	2330000	1920000	3300000	6230000	9150000	9	9	9	9	9	9	15600	20000	11200	9	9	9	9	9	9
CdM1209	pme3258	Negative	269	241.1	4.32	270.053	[M-H]-	-50	-30	C14314	6-Hydroxydaidzein	Isoflavone	0.203057	17800	19300	12000	14800	16000	100000	184000	9	9	9	49500	26100	2650	9	9	9	9	9	9	9	9	9	ko00943,ko01110
CdM1211	pme1547	Negative	445.085	269	4.33	446.085	[M-H]-	-50	-30	C10025	Baicalein-7-O-glucuronide (Baicalin)	Flavone	0.0908104	19500000	16900000	21000000	18500000	16500000	8400	168000000	32400000	64700000	134000	53600000	28700000	3710000	78700	12800000	284000	11900	6840	1480000	3410	17300	16300	--
CdM1213	pme3263	Negative	269	225	4.37	270.053	[M-H]-	-50	-30	C02495	2'-Hydroxydaidzein	Isoflavone	0.4304	88300	27200	57000	77800	95800	272000	448000	9	9	9	212000	111000	9680	9	9	9	9	9	9	9	9	9	ko00943
CdM1215	pme0250	Negative	187.105	125.1	4.43	188.105	[M-H]-	-50	-30	C08261	Azelaic Acid	Organic acids	0.0340528	1800000	1870000	1840000	1950000	1440000	2350000	1070000	1810000	1590000	3190000	1750000	3600000	1630000	2030000	1140000	3580000	4390000	5180000	1270000	2210000	3050000	2280000	--
CdM1217	pme3443	Negative	207.1	177.1	4.43	208.074	[M-H]-	-50	-30	-	Sinapinaldehyde	Hydroxycinnamoyl derivatives	0.0179542	403000	419000	418000	411000	318000	102000	202000	178000	230000	623000	230000	2610000	308000	1390000	107000	2100000	298000	1060000	377000	909000	687000	538000	--
CdM1225	pme0240	Negative	121.037	77	4.53	122.037	[M-H]-	-50	-30	C00180	Benzoic acid	Benzoic acid derivatives	0.0528693	991000	881000	975000	926000	820000	1440000	401000	1070000	751000	980000	1100000	1720000	906000	529000	571000	2540000	2220000	806000	436000	1650000	1600000	816000	ko00360,ko00362,ko00621,ko00623,ko00627,ko01063,ko01100,ko01110,ko01120,ko01220
CdM1226	pme3502	Negative	429.13	267.1	4.54	430.126	[M-H]-	-50	-30	C10509	Formononetin 7-O-glucoside (Ononin)	Isoflavone	0.265172	78700	73900	40400	64000	9	9	9	9	9	9	38400	27900	17400	29100	23700	34500	16200	663000	15100	96900	200000	106000	ko00943
CdM1227	pmb2849	Negative	347.1	319.3	4.55	348.1	[M-H]-	-50	-30	C01897	Camptothecin	Alkaloids	0.159647	14500	18800	21300	17100	9	9	9	9	9	9	17500	132000	247000	9	9	9	9	9	9	9	9	9
CdM1230	pme2963	Negative	287.06	125.1	4.58	288.063	[M-H]-	-50	-30	C00974	Aromadedrin (Dihydrokaempferol)	Flavonol	0.079209	45400	46600	40400	48900	29400	95700	162000	9	9	9	139000	162000	184000	9	9	9	9	9	9	9	9	9
CdM1231	pme1424	Negative	177.063	177.1	4.59	178.063	[M-H]-	-50	-30	C02666	Coniferylaldehyde	Hydroxycinnamoyl derivatives	0.0330737	572000	578000	591000	546000	498000	174000	294000	369000	592000	549000	398000	2490000	606000	668000	318000	1020000	1160000	1870000	217000	1540000	1480000	1480000	ko00940,ko01061,ko01100,ko01110
CdM1233	pme2636	Negative	301.15	253.2	4.61	302.152	[M-H]-	-50	-30	C18166	Enterodiol	Alcohols and polyols	0.161811	7510	7410	7510	5240	9	9	9	9400	5090	21100	3000	32200	17600	9440	2190	15800	21100	26700	3430	45000	37000	42600	--
CdM1248	pme0428	Negative	237.084	103.1	5	238.084	[M-H]-	-50	-30	-	3,4,5-Trimethoxycinnamic acid	Hydroxycinnamoyl derivatives	0.0316866	197000	193000	194000	183000	12100	15200	6910	19500	26000	12900	1020000	40500	4150	11700	2090000	164000	7300	5620	34200	36000	45000	29700	--
CdM1253	pme0088	Negative	285	133.1	5.04	286	[M-H]-	-50	-30	C01514	Luteolin	Flavone	0.0494492	645000	714000	705000	660000	218000	3540000	6870000	9	9	9	149000	77100	5240	9	9	9	9	9	9	9	9	9	C01514	ko00941,ko00944,ko01100,ko01110
CdM1255	pme2072	Negative	263	153.2	5.05	264.136	[M-H]-	-50	-30	C06082	(+)-cis,trans-Abscisic acid (ABA)	Phytohormones	0.0601268	361000	398000	386000	349000	316000	40300	677000	61200	964000	124000	982000	90500	520000	33900	647000	59700	35600	48500	164000	45100	229000	1680000
CdM1264	pme0100	Negative	491.4	293.1	5.17	492.4	[M-H]-	-50	-30	-	Salvianolicacid C	Others	0.172365	68300	67700	55500	47000	56500	1870	76800	4150	97100	2640	729000	12400	156000	8030	67300	15100	6770	31400	12900	15900	3280	16800	--	--
CdM1265	pme0299	Negative	147.052	61.8	5.22	148.052	[M-H]-	-50	-30	C00423	Cinnamic acid	Hydroxycinnamoyl derivatives	0.0330239	41200	39700	38900	41800	437000	10700	2460	4690	11700	18500	6270	10500	3500	13000	5690	8890	40700	24100	32400	4300	13900	17800	ko00130,ko00360,ko00940,ko01060,ko01070,ko01100,ko01110,ko01120,ko01220
CdM1270	pme1646	Negative	357.142	136.1	5.36	358.142	[M-H]-	-50	-30	-	Pinoresinol	Hydroxycinnamoyl derivatives	0.0369316	190000	201000	199000	186000	192000	18400	198000	56000	441000	63100	70300	189000	50600	49700	267000	101000	252000	384000	227000	118000	504000	332000	--
CdM1271	pmb2795	Negative	177	145.2	5.43	178	[M-H]-	-50	-30	-	4-Methoxycinnamic acid	Hydroxycinnamoyl derivatives	0.0272904	127000	132000	130000	124000	22800	417000	49900	1520000	40900	37700	79300	25000	33400	49600	141000	403000	14000	8050	26700	143000	40800	122000	--	--
CdM1272	pme2957	Negative	271.07	151.1	5.45	272.069	[M-H]-	-50	-30	C06561	Naringenin chalcone	Flavanone	0.00816326	1230000	1230000	1230000	1210000	857000	19400	5060000	9510	824000	24000	4400000	10800	294000	8970	1740000	58700	10900	7870	184000	10900	13400	9910	ko00941,ko01061,ko01100,ko01110
CdM1273	pmb2620	Negative	207.1	192.1	5.49	208.1	[M-H]-	-50	-30	-	3,4-Dimethoxycinnamic acid	Hydroxycinnamoyl derivatives	0.0295764	36100	36700	34600	37000	10900	43400	7920	86700	7820	14900	29700	19900	9560	32100	65600	374000	3910	2560	9710	86800	27400	76100	--
CdM1276	pme0376	Negative	271.069	151	5.54	272.068	[M-H]-	-50	-30	C00509	Naringenin	Flavanone	0.0257096	1220000	1260000	1250000	1190000	849000	12900	5220000	11200	1280000	19600	3360000	11800	226000	6470	1380000	50800	12100	9030	148000	7260	12700	5870
CdM1281	pme2661	Negative	383	281.1	5.61	384.339	[M-H]-	-50	-30	C05443	Vitamin D3	Vitamins	0.129251	13900	11200	14700	11800	12600	50200	31400	23000	9650	54100	9	9	9	34400	30600	26800	40000	26300	21200	18200	26700	17300	C05443	ko00100,ko01100,ko04977,ko05323
CdM1290	pme3461	Negative	301.1	151	5.71	302.279	[M-H]-	-50	-30	C09756	Homoeriodictyol	Flavanone	0.0843093	29400	25300	28900	25100	54200	58800	63400	28200	33200	23200	97900	60200	22500	9	9	9	9	9	9	9	9	9	ko00941
CdM1292	pme1654	Negative	209	58.7	5.75	210.126	[M-H]-	-50	-30	C08491	(+)-Jasmonic acid (JA)	Phytohormones	0.134377	107000	84900	79700	86300	107000	94700	82300	9	9	9	9	9	9	73900	81400	88900	72000	172000	122000	142000	631000	82700
CdM1297	pme1588	Negative	315.058	300.1	5.81	316.058	[M-H]-	-50	-30	C10084	Isorhamnetin	Flavonol	0.195366	5950	6240	6610	8920	16200	16600	16900	9	9	9	9	9	9	9	9	9	9	9	9	9	9	9	--
CdM1298	pmb3894	Negative	329.1	314.3	5.86	330.1	[M-H]-	-50	-30	-	Di-O-methylquercetin	Flavonol	0.0212091	6580000	6700000	6500000	6370000	6590000	234000	8320000	288000	14200000	251000	22600000	14700000	4890000	3360000	8810000	1760000	239000	334000	451000	244000	614000	348000
CdM1312	pme2069	Negative	331.4	331.3	6.26	332.162	[M-H]-	-50	-30	C11864?	Gibberellin A4 (GA4)	Phytohormones	0.112803	4950	5930	6510	5630	9060	5730	2400	9	9	9	5020	7610	10200	9	9	9	9	9	9	9	9	9	ko00904,ko01110,ko04075
CdM1313	pme1496	Negative	267.074	252.1	6.27	268.074	[M-H]-	-50	-30	C00858	Formononetin (4'-O-methyldaidzein)	Isoflavone	0.0651339	11200	11100	10000	11700	3830	8420	4270	4130	6320	6960	7830	8480	5200	4730	20600	19600	14100	11000	6950	6860	10900	5550	ko00943,ko01061,ko01110
CdM1317	pme2074	Negative	322.401	130.1	6.57	323.401	[M-H]-	-50	-30	-	N-[(-)-Jasmonoyl]-(L)-Isoleucine (JA-L-Ile)	Phytohormones	0.0523164	9550	9460	8860	8560	10000	16900	23700	2750	20500	11600	12200	7550	1490	1710	2310	6520	6220	5770	6000	19200	24400	4980	--
CdM1320	pmc1990	Negative	299.1	74.8	6.74	300.1	[M-H]-	-50	-30	-	4'-Hydroxy-5,7-dimethoxyflavanone	Flavanone	0.255342	354000	215000	338000	417000	172000	205000	157000	158000	144000	147000	163000	228000	203000	171000	207000	266000	197000	226000	191000	240000	243000	219000	--
CdM1321	pme2181	Negative	513.2	453.2	6.74	514.22	[M-H]-	-50	-30	C08773	Nomilin	Terpenoids	0.195356	42000	31300	28700	42100	90200	165000	15300	9	9	9	25700	25100	24500	39900	30700	49000	140000	92900	45800	10400	27500	44500	--
CdM1322	pme2827	Negative	239	223	6.74	240.245	[M-H]-	-50	-30	C00517	Palmitaldehyde	Lipids_Fatty acids	0.257518	8070000	5180000	8110000	10100000	4080000	4760000	3480000	3710000	3350000	3690000	4040000	5520000	4780000	4090000	4840000	6840000	4630000	5610000	4630000	6010000	5960000	5250000
CdM1323	pme3464	Negative	285.08	164	6.81	286.084	[M-H]-	-50	-30	C05334	Isosakuranetin (4'-Methylnaringenin)	Flavanone	0.119532	3320	2710	2690	2570	2650	2900	1950	1800	1580	2960	3760	2710	2460	2400	3570	2310	2880	3930	3180	3150	3430	3240	--
CdM1325	pme3292	Negative	283	268.1	6.95	284.069	[M-H]-	-50	-30	C10521	Prunetin	Isoflavone	0.128584	40000	52800	51300	53600	14600	144000	273000	9	9	9	363000	190000	17000	9	9	9	9	9	9	9	9	9
CdM1326	pme1541	Negative	283.069	268	6.98	284.069	[M-H]-	-50	-30	C01470	Acacetin	Flavone	0.0966555	41300	50000	47800	41700	15000	138000	260000	9	9	9	331000	173000	15500	9	9	9	9	9	9	9	9	9	C01470	ko00944
CdM1333	pmd0158	Negative	424.2	285.8	7.37	425.2	[M-H]-	-50	-30	-	LysoPE 14:0 (2n isomer)	Lipids_Glycerophospholipids	0.123701	343000	410000	428000	335000	753000	307000	1480000	304000	899000	42300	894000	407000	589000	165000	872000	639000	165000	111000	657000	307000	260000	349000	--	--
CdM1334	pme3039	Negative	329.2	257.1	7.41	330.183	[M-H]-	-50	-30	C14162	GIBBERELLIN A15	Phytohormones	0.0293067	22100	21300	21600	20600	9	9	9	15900	25300	6470	14100	33300	52500	12900	81600	47300	9	9	9	9	9	9	--
CdM1336	pmb2791	Negative	309.1	291.4	7.5	310.1	[M-H]-	-50	-30	-	9-HpOTrE	Lipids_Fatty acids	0.0648819	498000	564000	539000	493000	685000	384000	458000	400000	468000	163000	245000	475000	940000	495000	2730000	467000	215000	260000	431000	194000	245000	1200000	--
CdM1339	pmb2792	Negative	293	193.2	7.77	294	[M-H]-	-50	-30	-	13-HOTrE(r)	Lipids_Fatty acids	0.0458256	1470000	1550000	1440000	1390000	2050000	974000	1020000	1140000	1580000	514000	754000	2240000	2110000	397000	7240000	1320000	1020000	461000	1360000	762000	946000	1960000	--
CdM1340	pmb2789	Negative	309	291.5	7.8	310	[M-H]-	-50	-30	-	13-HpOTrE(r)	Lipids_Fatty acids	0.10263	969000	966000	782000	979000	763000	725000	680000	761000	926000	199000	518000	946000	805000	488000	5090000	873000	442000	381000	689000	411000	387000	1590000	--
CdM1341	pmb2804	Negative	311.1	293.4	7.82	312.1	[M-H]-	-50	-30	C04717	13-HPODE	Lipids_Fatty acids	0.124249	128000	152000	153000	119000	111000	34900	162000	50600	162000	30300	296000	120000	210000	84500	187000	153000	79100	60800	51800	95500	82400	84100	ko00591,ko01100
CdM1344	pmb2786	Negative	293	275.4	8.37	294	[M-H]-	-50	-30	-	9-HOTrE	Lipids_Fatty acids	0.112487	49100	42200	41800	37500	22300	15800	49900	10700	49500	5550	75600	32200	56000	58000	101000	73100	19400	10200	15200	30300	27800	20200	--
CdM1345	pmd0160	Negative	452.3	255.3	8.55	453.3	[M-H]-	-50	-30	-	LysoPE 16:0 (2n isomer)	Lipids_Glycerophospholipids	0.134348	44900000	35700000	36000000	33500000	36300000	39300000	270000000	36900000	264000000	1600000	158000000	93200000	68500000	30000000	85200000	55500000	33000000	6750000	8560000	88200000	13800000	69400000	--	--
CdM1349	pmb2778	Negative	295	183.3	8.92	296	[M-H]-	-50	-30	-	9,10-EODE	Lipids_Fatty acids	0.0798205	2690000	2260000	2450000	2660000	2410000	824000	3800000	753000	4270000	212000	6950000	2060000	3390000	2130000	4410000	3650000	1160000	761000	1310000	1960000	1260000	1430000	--
CdM1351	pmb2787	Negative	293.2	249.9	9.12	294.2	[M-H]-	-50	-30	-	9-KODE	Lipids_Fatty acids	0.10171	54900	48200	43900	45300	40700	6780	108000	11700	144000	77900	93900	13300	20400	11500	98000	49400	8850	3740	17100	23700	35800	45600
CdM1353	pmb2640	Negative	199	181.3	9.62	200	[M-H]-	-50	-30	C02679	Lauric acid (C12:0)	Lipids_Fatty acids	0.107568	41200	32500	34300	38400	32100	33400	39400	35600	35500	18000	45500	32100	38400	26200	50900	84900	29600	35200	31200	41000	33800	36800
CdM1355	pmb2799	Negative	295	277.5	9.7	296	[M-H]-	-50	-30	-	12,13-EODE	Lipids_Fatty acids	0.142879	561000	430000	412000	495000	372000	65400	931000	68500	1430000	749000	1800000	79100	183000	54400	1410000	338000	64100	47200	119000	266000	127000	319000	--
CdM1357	pmb2643	Negative	225	207.2	10	226	[M-H]-	-50	-30	C08322	Myristoleic acid (C14:1)	Lipids_Fatty acids	0.147685	22500	18000	16900	22500	14700	20500	20400	12400	15900	6980	18200	13900	21400	11500	15700	53300	14400	16000	19100	30100	16700	20600
CdM1361	mws1150	Negative	785.4	623.2	3.19	786.258	[M-H]-	-50	-30	C10450	echinacoside	Phenolic Acids	0.0398408	196000000	196000000	184000000	182000000	35000000	12600000	7490000	10900000	12300000	176000000	14700000	12100000	31300000	51200000	37000000	235000000	71600000	330000000	41700000	293000000	124000000	118000000	--
CdM1362	mws1151	Negative	799.2	161	3.42	800.755	[M-H]-	-50	-30	-	cistanoside A	Phenylpropanoids	0.0536667	208000000	210000000	191000000	190000000	43000000	109000000	2370000	68900000	2330000	146000000	341000	122000000	2710000	50600000	2120000	158000000	191000000	290000000	57800000	337000000	272000000	229000000	--	--
CdM1363	mws1154	Negative	623.2	160.9	3.71	624.205	[M-H]-	-50	-30	-	Isoacteoside	phenylethanoid glycosides	0.0496823	347000000	353000000	323000000	320000000	195000000	46800000	316000000	27600000	247000000	396000000	358000000	6420000	372000000	195000000	365000000	415000000	99600000	362000000	341000000	346000000	109000000	82600000	--
CdM1364	mws1149	Negative	623.1	160.7	3.88	624.205	[M-H]-	-50	-30	C10501	acteoside	phenylpropanoid glycsoides	0.0557276	324000000	338000000	306000000	299000000	171000000	38900000	293000000	23600000	231000000	394000000	344000000	5610000	357000000	174000000	346000000	462000000	89100000	358000000	328000000	334000000	92400000	76800000
CdM1365	mws1153	Negative	665.2	160.9	4.15	666.624	[M-H]-	-50	-30	-	2'-Acetylacteoside	phenylethanoid glycosides	0.122577	281000000	223000000	220000000	264000000	256000000	121000000	262000000	193000000	253000000	233000000	265000000	10100000	268000000	157000000	333000000	366000000	17900000	154000000	254000000	129000000	89000000	125000000
CdM1366	mws1152	Negative	429.1	266.8	4.57	430.126	[M-H]-	-50	-30	C10509??	ononin	Others	0.103212	42700	42000	51200	50000	9	9	9	9	9	9	39100	29900	20600	9	9	9	294000	569000	19300	72500	176000	97500	--	--
